# Supplementary material for: Ligand activation mechanisms of human KCNQ2 channel
Source: Springer Nature journal article supplement (doi:10.1038/s41467-023-42416-x), 2023-10-19
Supplement: MOESM1 [file 41467_2023_42416_MOESM1_ESM.pdf]

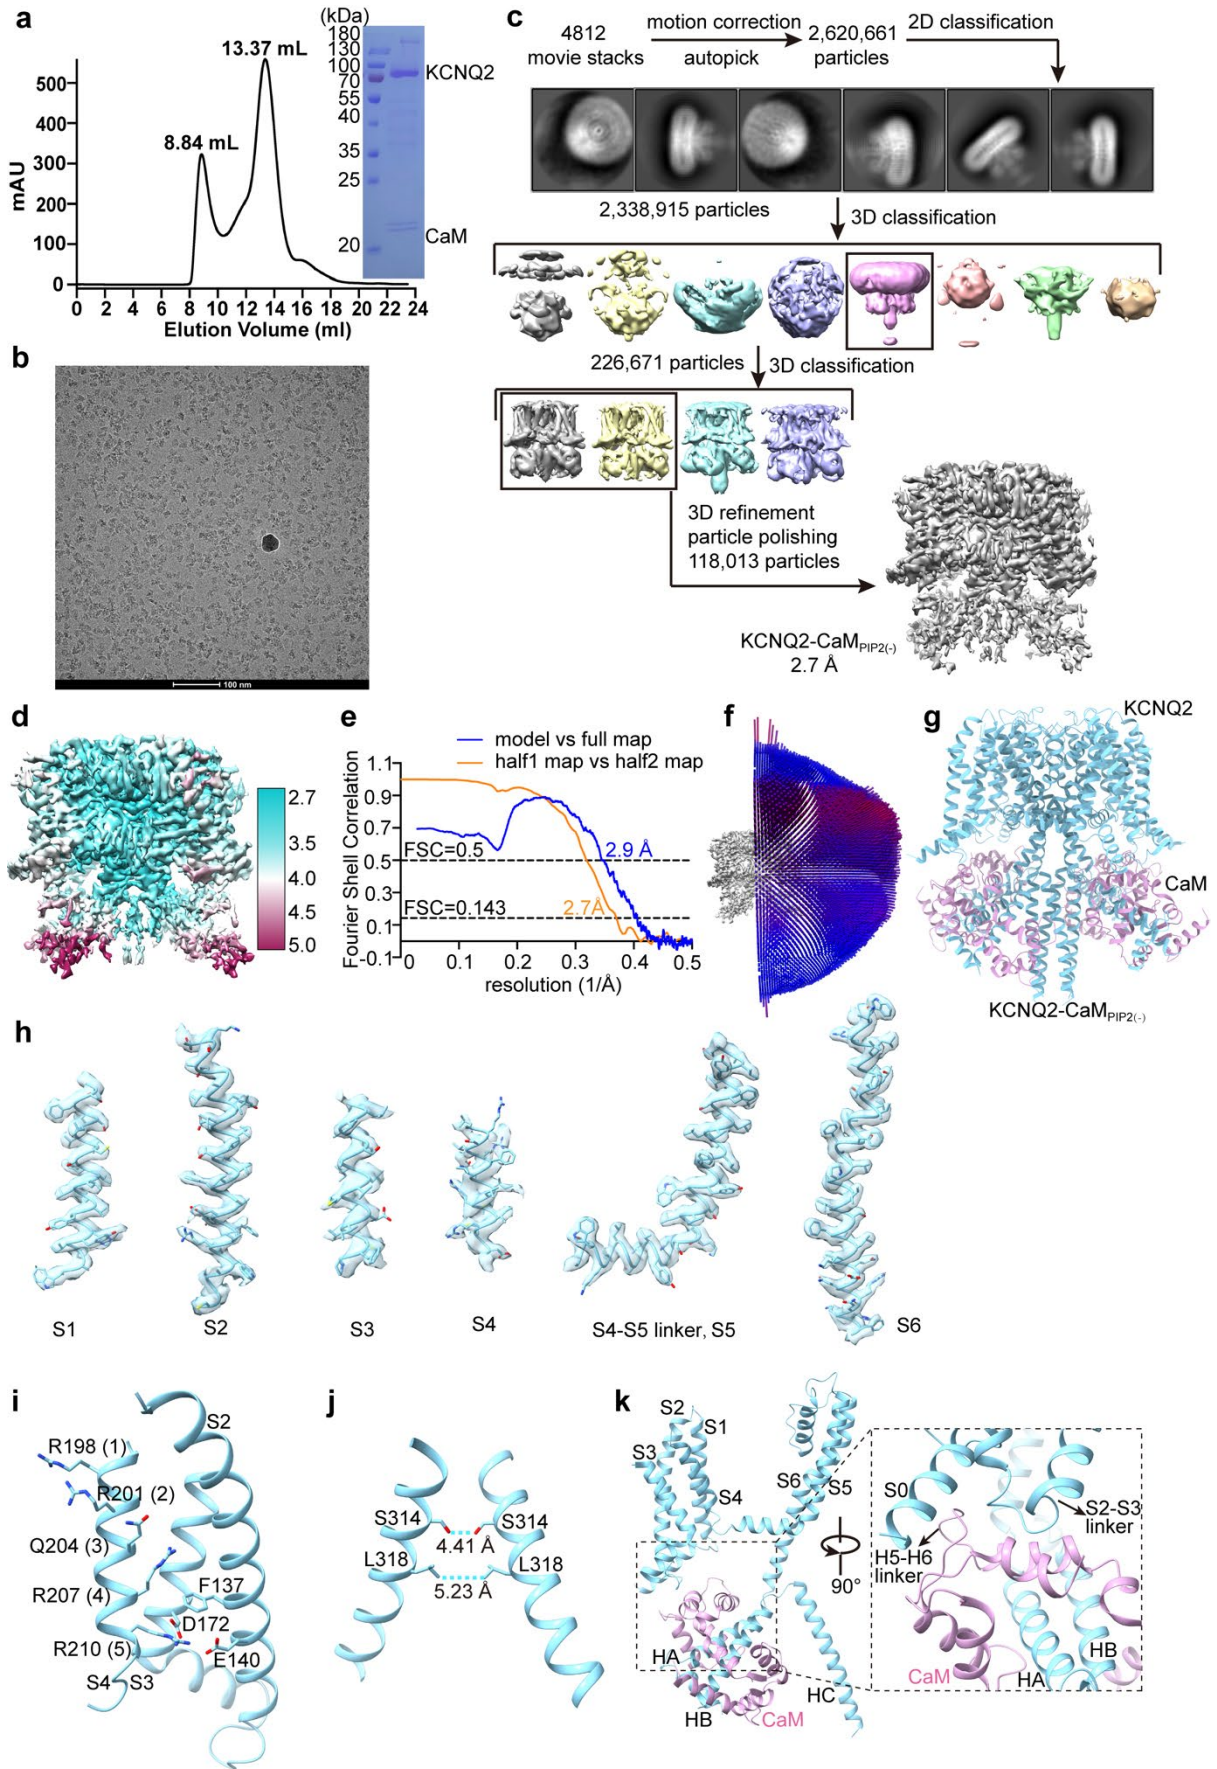

**Supplementary Fig. 1 Structure determination of KCNQ2-CaM<sub>PIP2(-)</sub>. a** Size-exclusion

chromatography of KCNQ2-CaM on Superose 6 (GE Healthcare) and SDS-PAGE analysis of the final sample for KCNQ2-CaM<sub>PIP2(-)</sub>. The y axis is in mili absorption unit (mAU). Source data are provided in the Source Data file. **b** Representative cryo-EM micrograph of KCNQ2-CaM<sub>PIP2(-)</sub>. **c** Flowchart of image processing for KCNQ2-CaM<sub>PIP2(-)</sub> particles. **d** The density map of KCNQ2-CaM<sub>PIP2(-)</sub> colored by local resolution. The local resolution was estimated with RELION 3.1 and generated in Chimera. **e** The Gold-standard Fourier shell correlation (FSC) curves of the final 3D reconstruction of KCNQ2-CaM<sub>PIP2(-)</sub>, and the FSC curve for cross-validation between the map and the model of KCNQ2-CaM<sub>PIP2(-)</sub>. **f** Euler angle distribution of KCNQ2-CaM<sub>PIP2(-)</sub> particles used in the final 3D reconstruction, with the heights of the cylinders corresponding to the number of particles. **g** The cartoon model of KCNQ2-CaM<sub>PIP2(-)</sub> in the side view. **h** Sample maps of the KCNQ2-CaM<sub>PIP2(-)</sub> structure. **i** The activated VSD of KCNQ2-CaM<sub>PIP2(-)</sub> in the side view with S1 omitted for clarity. **j** The closed activation gate of KCNQ2-CaM<sub>PIP2(-)</sub>. The dashed lines show diagonal atom-to-atom distance (in Å) at the constriction-lining residues Ser314 and Leu318. **k** Interactions between the VSD of KCNQ2 and CaM.

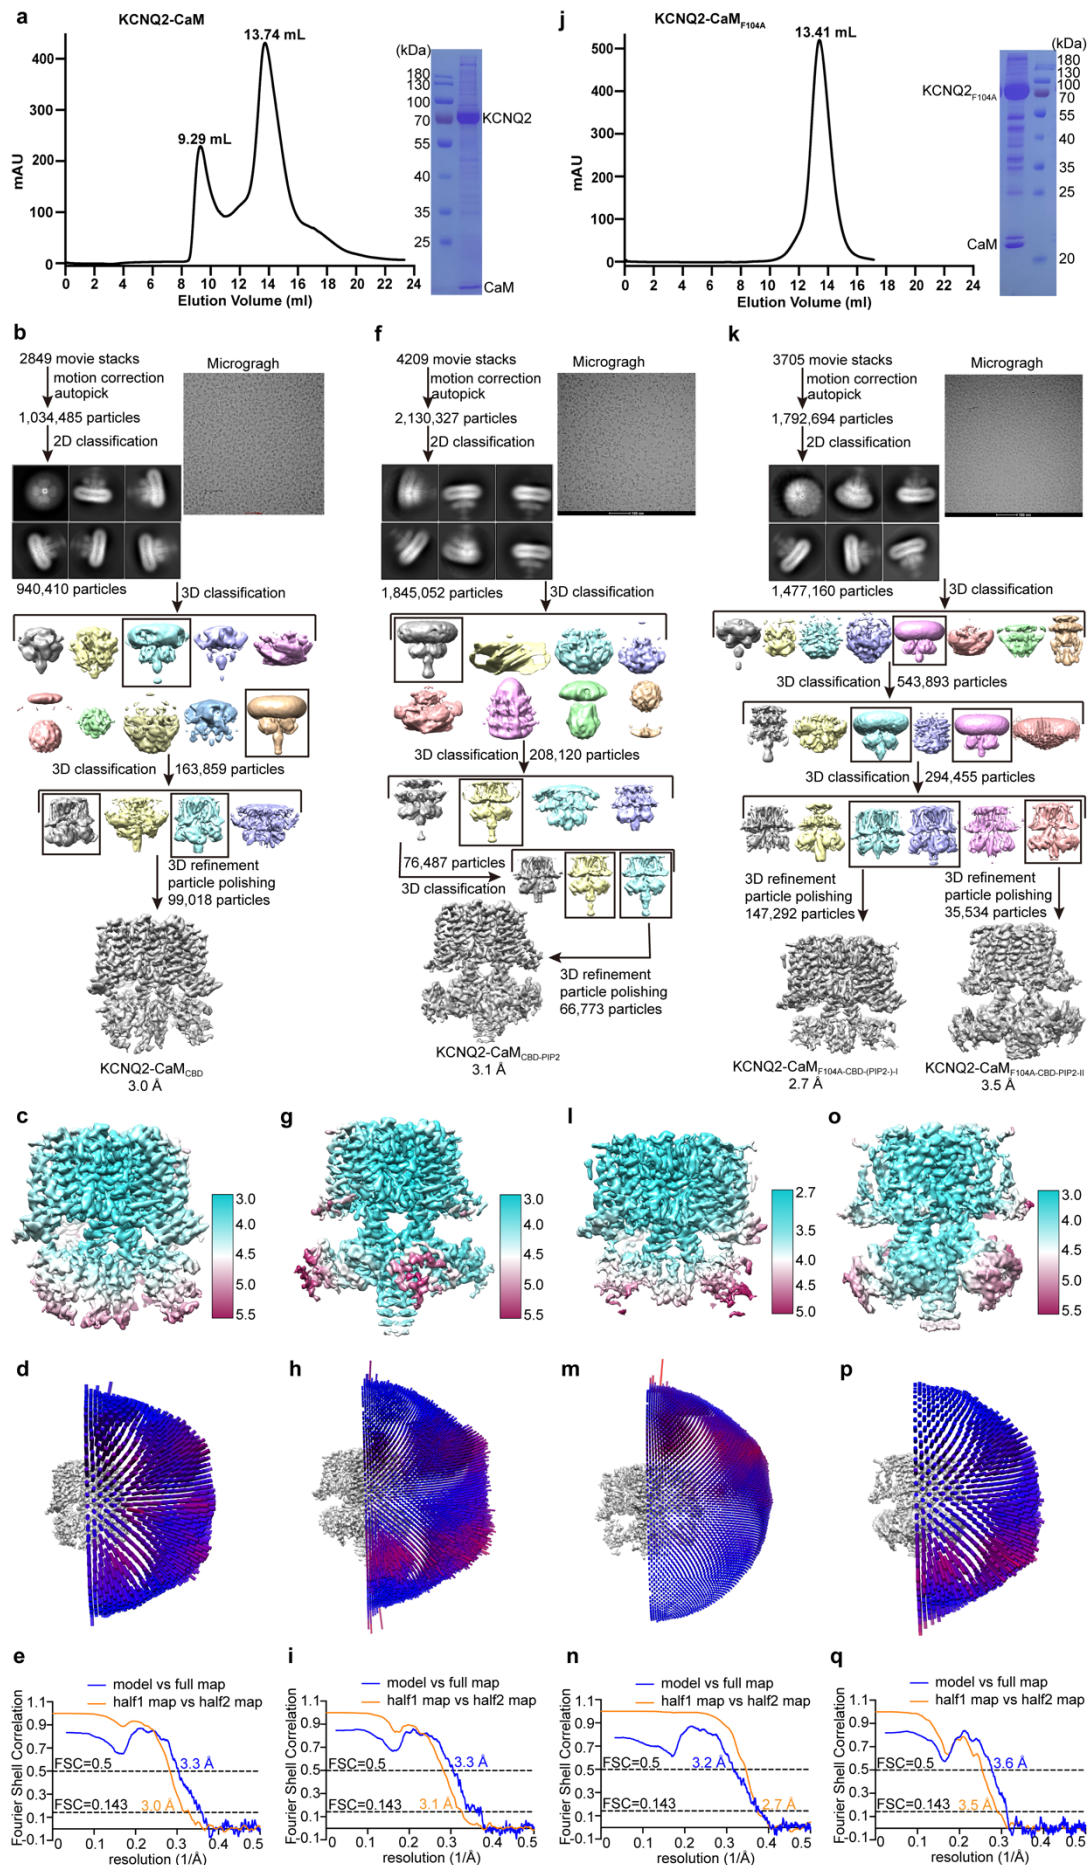

**Supplementary Fig. 2 Structure determination of KCNQ2-CaM<sub>CBD</sub>, KCNQ2-CaM<sub>CBD</sub>-PIP<sub>2</sub>, KCNQ2-CaM<sub>F104A</sub>-CBD-PIP<sub>2</sub>(-)-I, and CaM<sub>F104A</sub>-CBD-PIP<sub>2</sub>-II.** **a** Size-exclusion chromatography of KCNQ2-CaM on Superose 6 (GE Healthcare) and SDS-PAGE analysis of the final sample for KCNQ2-CaM<sub>CBD</sub> and KCNQ2-CaM<sub>PIP<sub>2</sub></sub>-CBD. The y axis is in mili absorption unit (mAU). **b, f, k** Flowchart of image processing for KCNQ2-CaM<sub>CBD</sub>, KCNQ2-CaM<sub>CBD</sub>-PIP<sub>2</sub>, and KCNQ2-CaM<sub>F104A</sub>-CBD-PIP<sub>2</sub> particles, respectively. **c, g, l, o** The density map of KCNQ2-CaM<sub>CBD</sub>, KCNQ2-CaM<sub>CBD</sub>-PIP<sub>2</sub>, KCNQ2-CaM<sub>F104A</sub>-CBD-(PIP<sub>2</sub>-)-I, and KCNQ2-CaM<sub>F104A</sub>-CBD-PIP<sub>2</sub>-II colored by local resolution. The local resolution was estimated with RELION 3.1 and generated in Chimera. **d, h, m, p** Euler angle distribution of particles included in the final *C4*-symmetric 3D reconstruction of KCNQ2-CaM<sub>CBD</sub>, KCNQ2-CaM<sub>CBD</sub>-PIP<sub>2</sub>, KCNQ2-CaM<sub>F104A</sub>-CBD-(PIP<sub>2</sub>-)-I, and KCNQ2-CaM<sub>F104A</sub>-CBD-PIP<sub>2</sub>-II, respectively. **e, i, n, q** The Gold-standard Fourier shell correlation (FSC) curves of the final 3D reconstruction of KCNQ2-CaM<sub>CBD</sub>, KCNQ2-CaM<sub>CBD</sub>-PIP<sub>2</sub>, KCNQ2-CaM<sub>F104A</sub>-CBD-(PIP<sub>2</sub>-)-I, and KCNQ2-CaM<sub>F104A</sub>-CBD-PIP<sub>2</sub>-II, and the FSC curve for cross-validation between the map and the model of KCNQ2-CaM<sub>CBD</sub>, KCNQ2-CaM<sub>CBD</sub>-PIP<sub>2</sub>, KCNQ2-CaM<sub>F104A</sub>-CBD-(PIP<sub>2</sub>-)-I, and KCNQ2-CaM<sub>F104A</sub>-CBD-PIP<sub>2</sub>-II, respectively. **j** Size-exclusion chromatography of KCNQ2-CaM<sub>F104A</sub> on Superose 6 (GE Healthcare) and SDS-PAGE analysis of the final sample for KCNQ2-CaM<sub>F104A</sub>-CBD-PIP<sub>2</sub>. The y axis is in mili absorption unit (mAU). For **a** and **j**, source data are provided in the Source Data file.

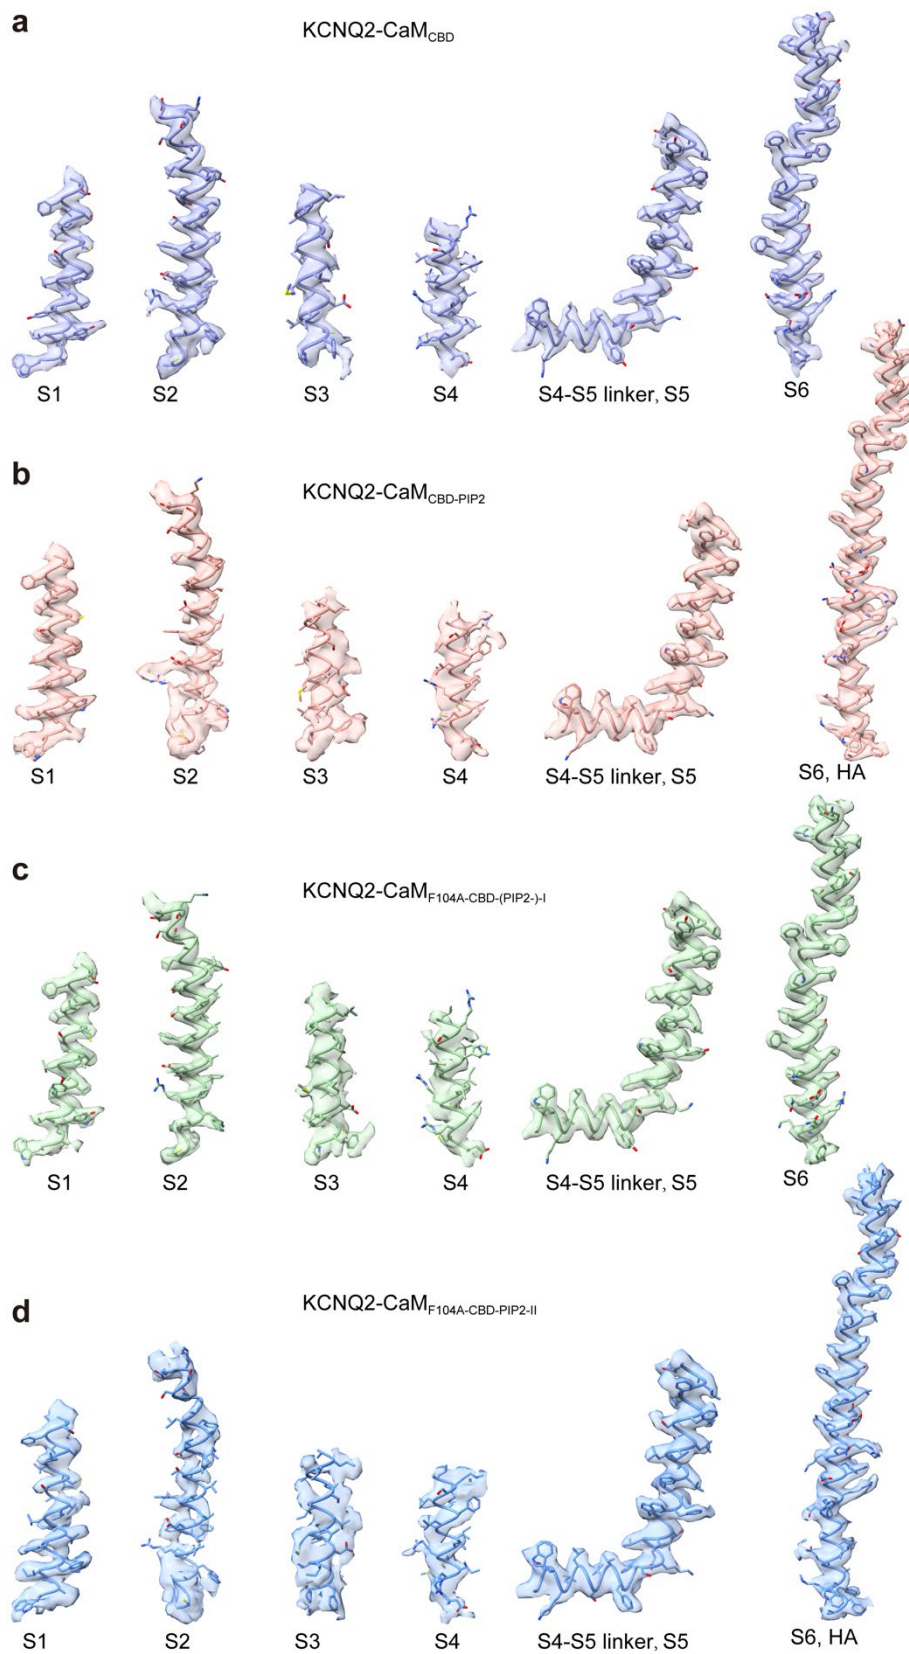

**Supplementary Fig. 3 Sample maps of KCNQ2-CaM structures.** **a-d** Sample maps of the KCNQ2-CaM<sub>CBD</sub>, KCNQ2-CaM<sub>CBD-PIP2</sub>, KCNQ2-CaM<sub>F104A-CBD-PIP2(-)-I</sub>, and KCNQ2-CaM<sub>F104A-CBD-PIP2(-)-II</sub> structures.

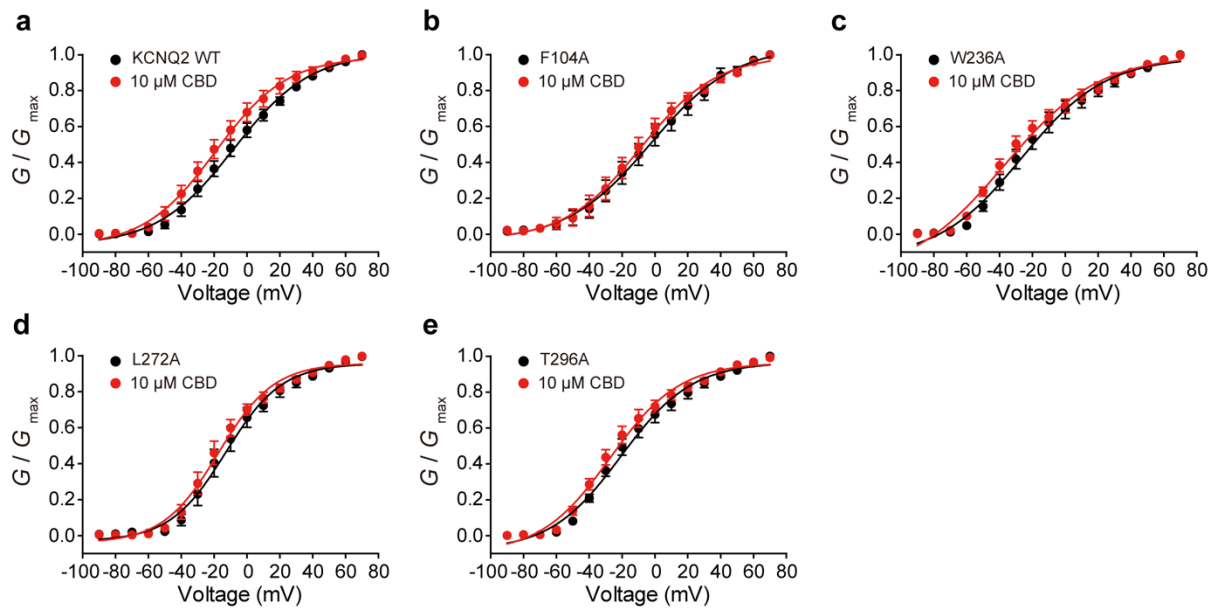

**Supplementary Fig. 4 Voltage-dependent activation curves of WT and mutant KCNQ2 channels before (black) and after (red) application of 10  $\mu\text{M}$  CBD. a-e** Normalized  $G$ - $V$  relations of WT KCNQ2, F104A, W236A, L272A, and T296A mutants. CHO cells transiently expressing the channels were held at -80 mV and depolarizing voltage steps from -90 mV to +70 mV with 10 mV increments were applied for 1500 ms, followed by a hyperpolarizing step to -120 mV for 500 ms. The conductance was normalized to the maximal conductance of each treatment ( $G / G_{\max}$ ) and the voltage-dependent activation curve fitted with the Boltzmann equation. Data are presented as mean  $\pm$  SEM. For W236A,  $n = 3$  individual cells; for WT and all the other mutants,  $n = 5$  individual cells. Source data are included in the Source Data file.



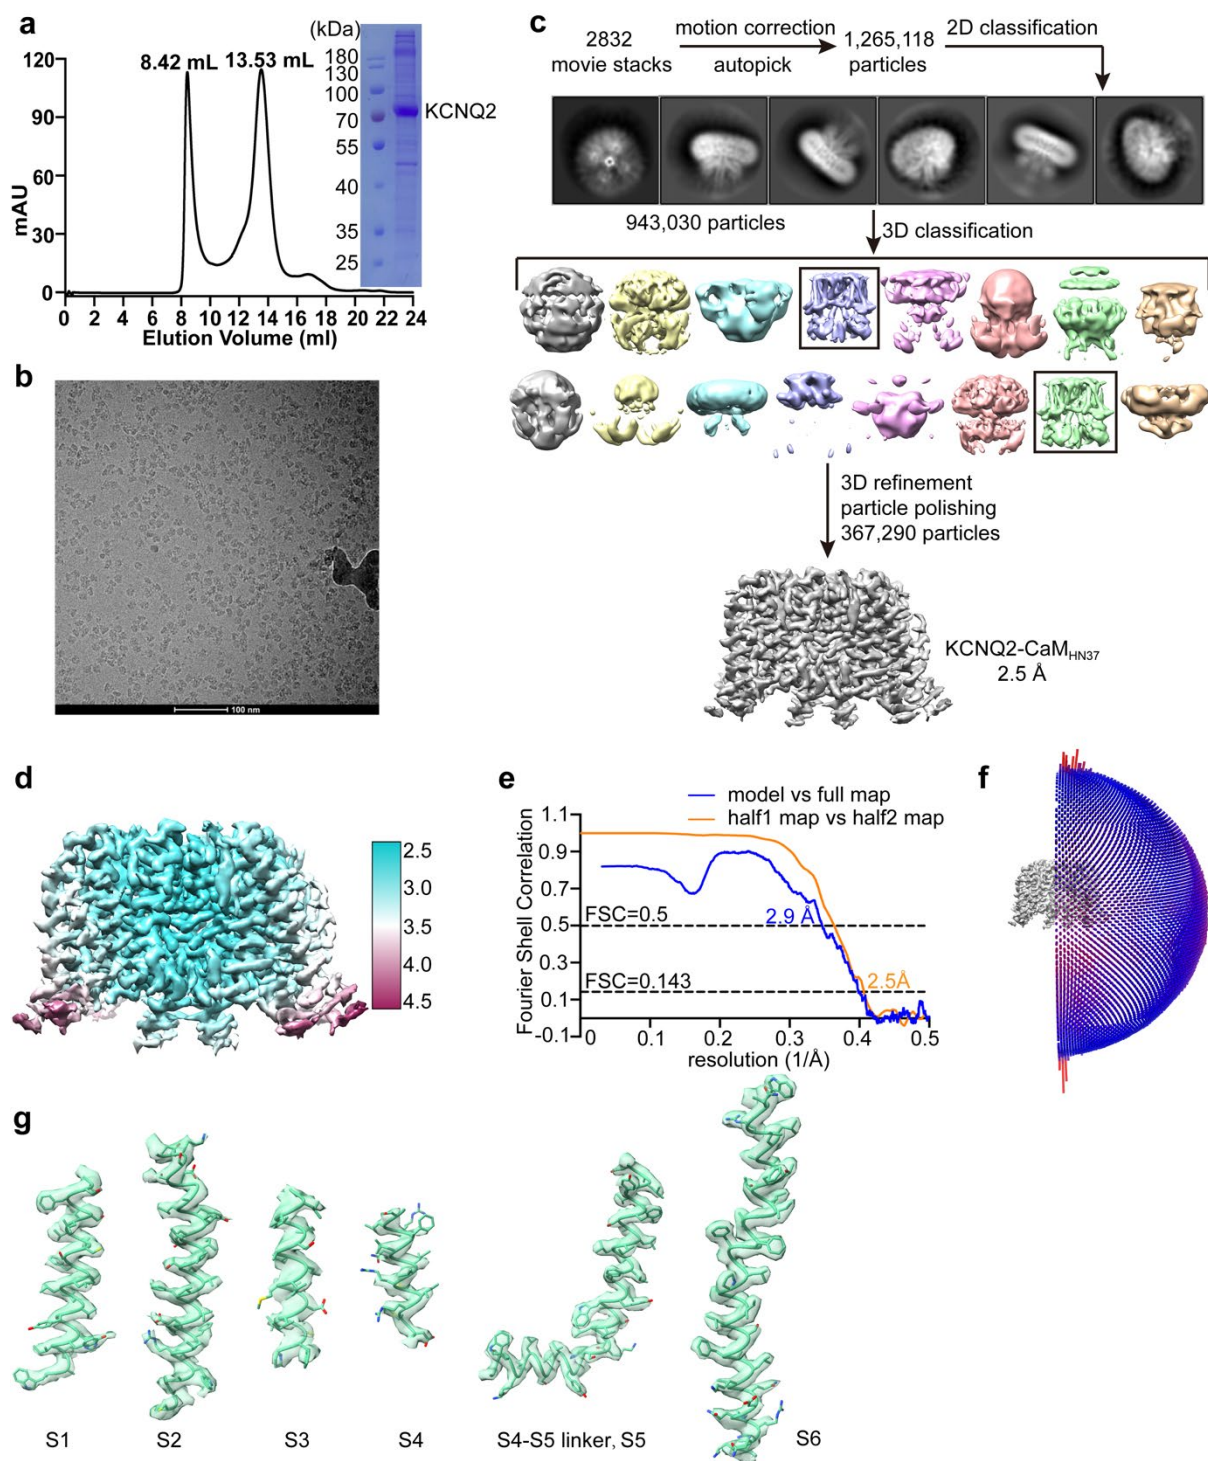

**Supplementary Fig. 6 Structure determination of KCNQ2-CaM<sub>HN37</sub>.** **a** Size-exclusion chromatography of KCNQ2-CaM on Superose 6 (GE Healthcare) and SDS-PAGE analysis of the final sample for KCNQ2-CaM<sub>HN37</sub>. The y axis is in mili absorption unit (mAU). Source data are included in the Source Data file. **b** Representative cryo-EM micrograph of KCNQ2-CaM<sub>HN37</sub>. **c** Flowchart of image processing for KCNQ2-CaM<sub>HN37</sub> particles. **d** The density map

of KCNQ2-CaM<sub>HN37</sub> colored by local resolution. The local resolution was estimated with RELION 3.1 and generated in Chimera. **e** The Gold-standard Fourier shell correlation (FSC) curves of the final 3D reconstruction of KCNQ2-CaM<sub>HN37</sub>, and the FSC curve for cross-validation between the map and the model of KCNQ2-CaM<sub>HN37</sub>. **f** Euler angle distribution of KCNQ2-CaM<sub>HN37</sub> particles used in the final 3D reconstruction, with the heights of the cylinders corresponding to the number of particles. **g** Sample maps of the KCNQ2-CaM<sub>HN37</sub> structure.

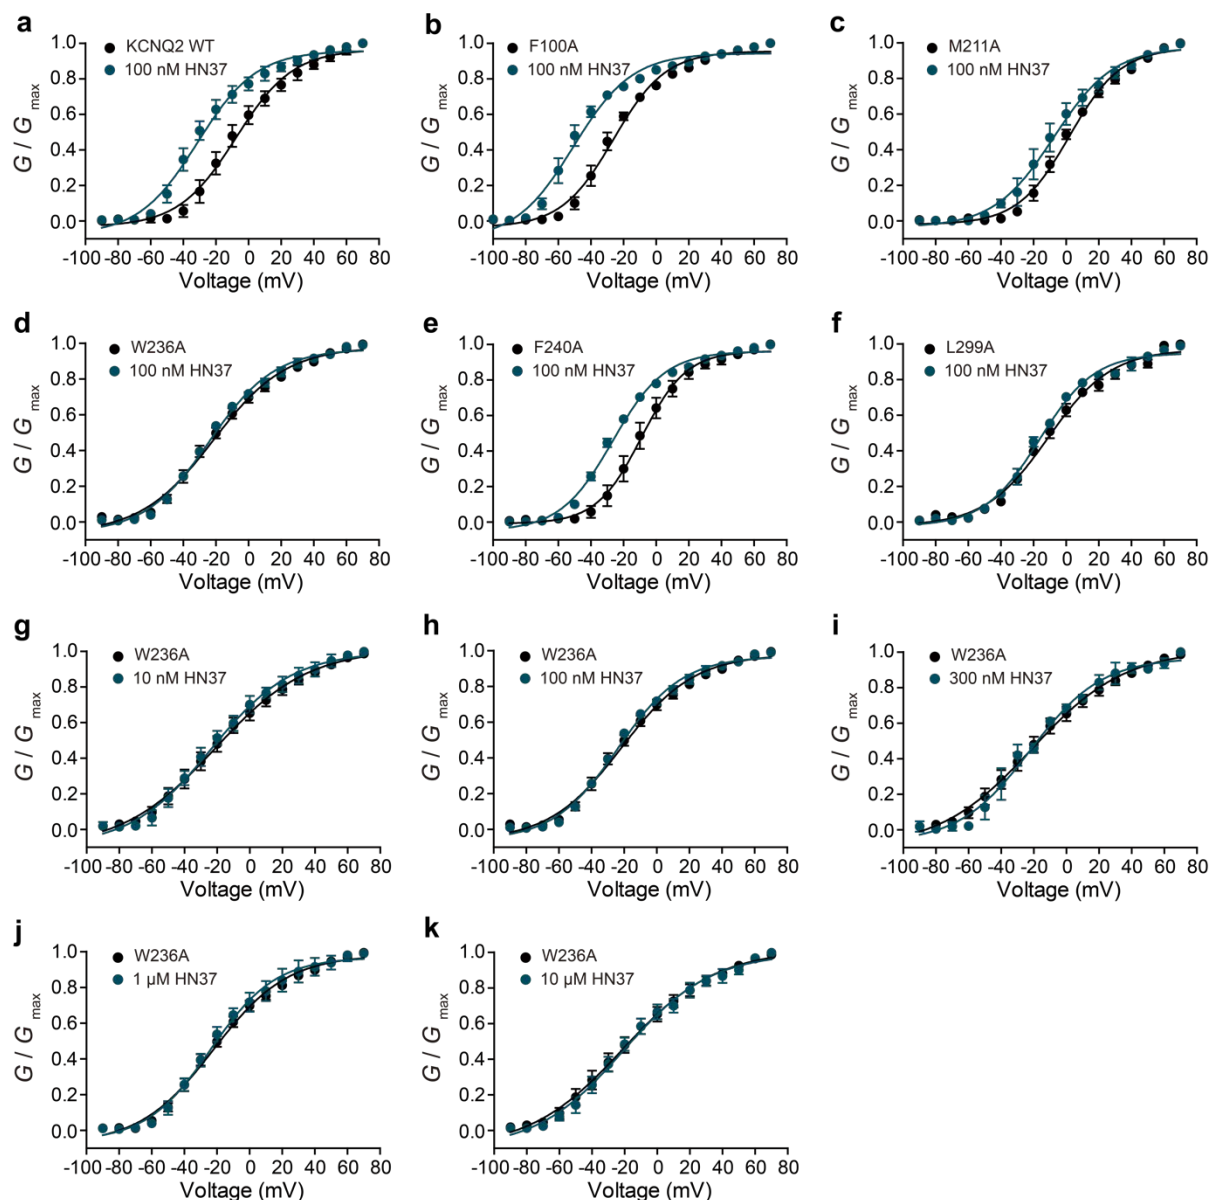

**Supplementary Fig. 7 Voltage-dependent activation curves of WT and mutant KCNQ2 channels before (black) and after (blue) application of 100 nM HN37. a-f** Normalized  $G$ - $V$  relations of WT KCNQ2 ( $n = 5$ ), F100A ( $n = 4$ ), M211A ( $n = 4$ ), W236A ( $n = 4$ ), F240A ( $n = 5$ ), and L299A ( $n = 3$ ) mutants. CHO cells transiently expressing the channels were held at  $-100$  mV and depolarizing voltage steps from  $-100$  mV or  $-90$  mV to  $+70$  mV with  $10$  mV increments were applied for  $1500$  ms, followed by a hyperpolarizing step to  $-120$  mV for  $500$  ms. The conductance was normalized to the maximal conductance of each treatment ( $G / G_{\max}$ ) and the voltage-dependent activation curve fitted with the Boltzmann equation. Data are presented as means  $\pm$  SEM.  $n$  indicates the number of experiments from individual cells. **g-k**

The sensitivity of the KCNQ2 W236A mutant to HN37. CHO cells transiently expressing W236A mutant were held at -100 mV and depolarizing voltage steps from -90 mV to +70 mV with 10 mV increments were applied for 1500 ms, followed by a hyperpolarizing step to -120 mV for 500 ms. The conductance values before (black) and after (red) application of HN37 at indicated concentration were separately normalized to the maximal conductance of each treatment ( $G / G_{\max}$ ) and then the voltage-dependent activation curve fitted with the Boltzmann equation. Data are presented as means  $\pm$  SEM. n values are 5 for 10 nM HN37, 6 for 100 nM HN37, 3 for 300 nM HN37, 6 for 1  $\mu$ M HN37, and 5 for 10  $\mu$ M HN37. n indicates the number of experiments from individual cells. Source data are included as a Source Data file.

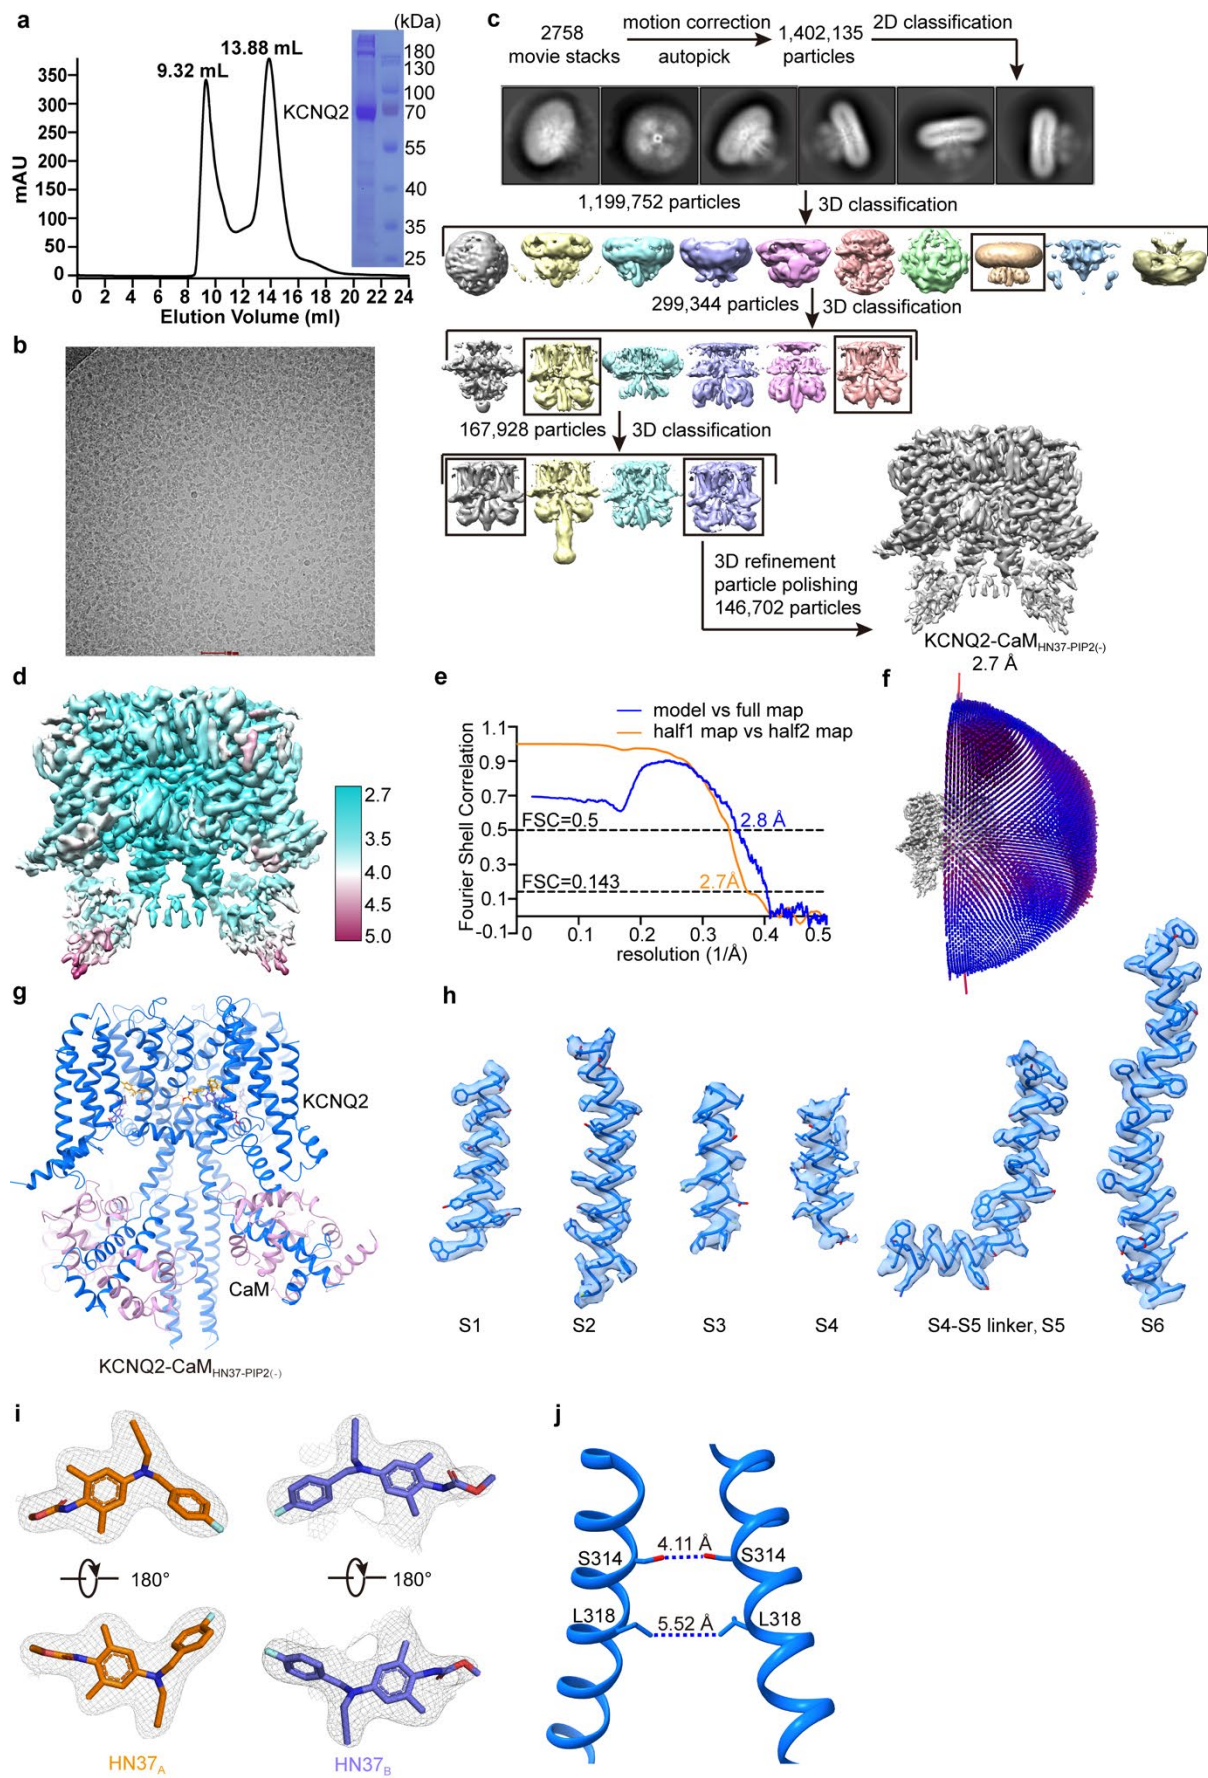

**Supplementary Fig. 8 Structure determination of KCNQ2-CaM<sub>HN37-PIP2(-)</sub>. a Size-**

exclusion chromatography of KCNQ2-CaM on Superose 6 (GE Healthcare) and SDS-PAGE analysis of the final sample for KCNQ2-CaM<sub>HN37-PIP2(-)</sub>. The y axis is in mili absorption unit (mAU). Source data are included in the Source Data file. **b** Representative cryo-EM micrograph of KCNQ2-CaM<sub>HN37-PIP2(-)</sub>. **c** Flowchart of image processing for KCNQ2-CaM<sub>HN37-PIP2(-)</sub> particles. **d** The density map of KCNQ2-CaM<sub>HN37-PIP2(-)</sub> colored by local resolution. The local resolution was estimated with RELION 3.1 and generated in Chimera. **e** The Gold-standard Fourier shell correlation (FSC) curves of the final 3D reconstruction of KCNQ2-CaM<sub>HN37-PIP2(-)</sub>, and the FSC curve for cross-validation between the map and the model of KCNQ2-CaM<sub>HN37-PIP2(-)</sub>. **f** Euler angle distribution of KCNQ2-CaM<sub>HN37-PIP2(-)</sub> particles used in the final 3D reconstruction, with the heights of the cylinders corresponding to the number of particles. **g** The cartoon model of KCNQ2-CaM<sub>HN37-PIP2(-)</sub> in the side view. **h** Sample maps of the KCNQ2-CaM<sub>HN37-PIP2(-)</sub> structure. **i** The density maps of two HN37 molecules in different orientations at the contour level of 4.5  $\sigma$ . **j** The closed activation gate of KCNQ2-CaM<sub>HN37-PIP2(-)</sub>. The dashed lines show diagonal atom-to-atom distance (in Å) at the constriction-lining residues Ser314 and Leu318.

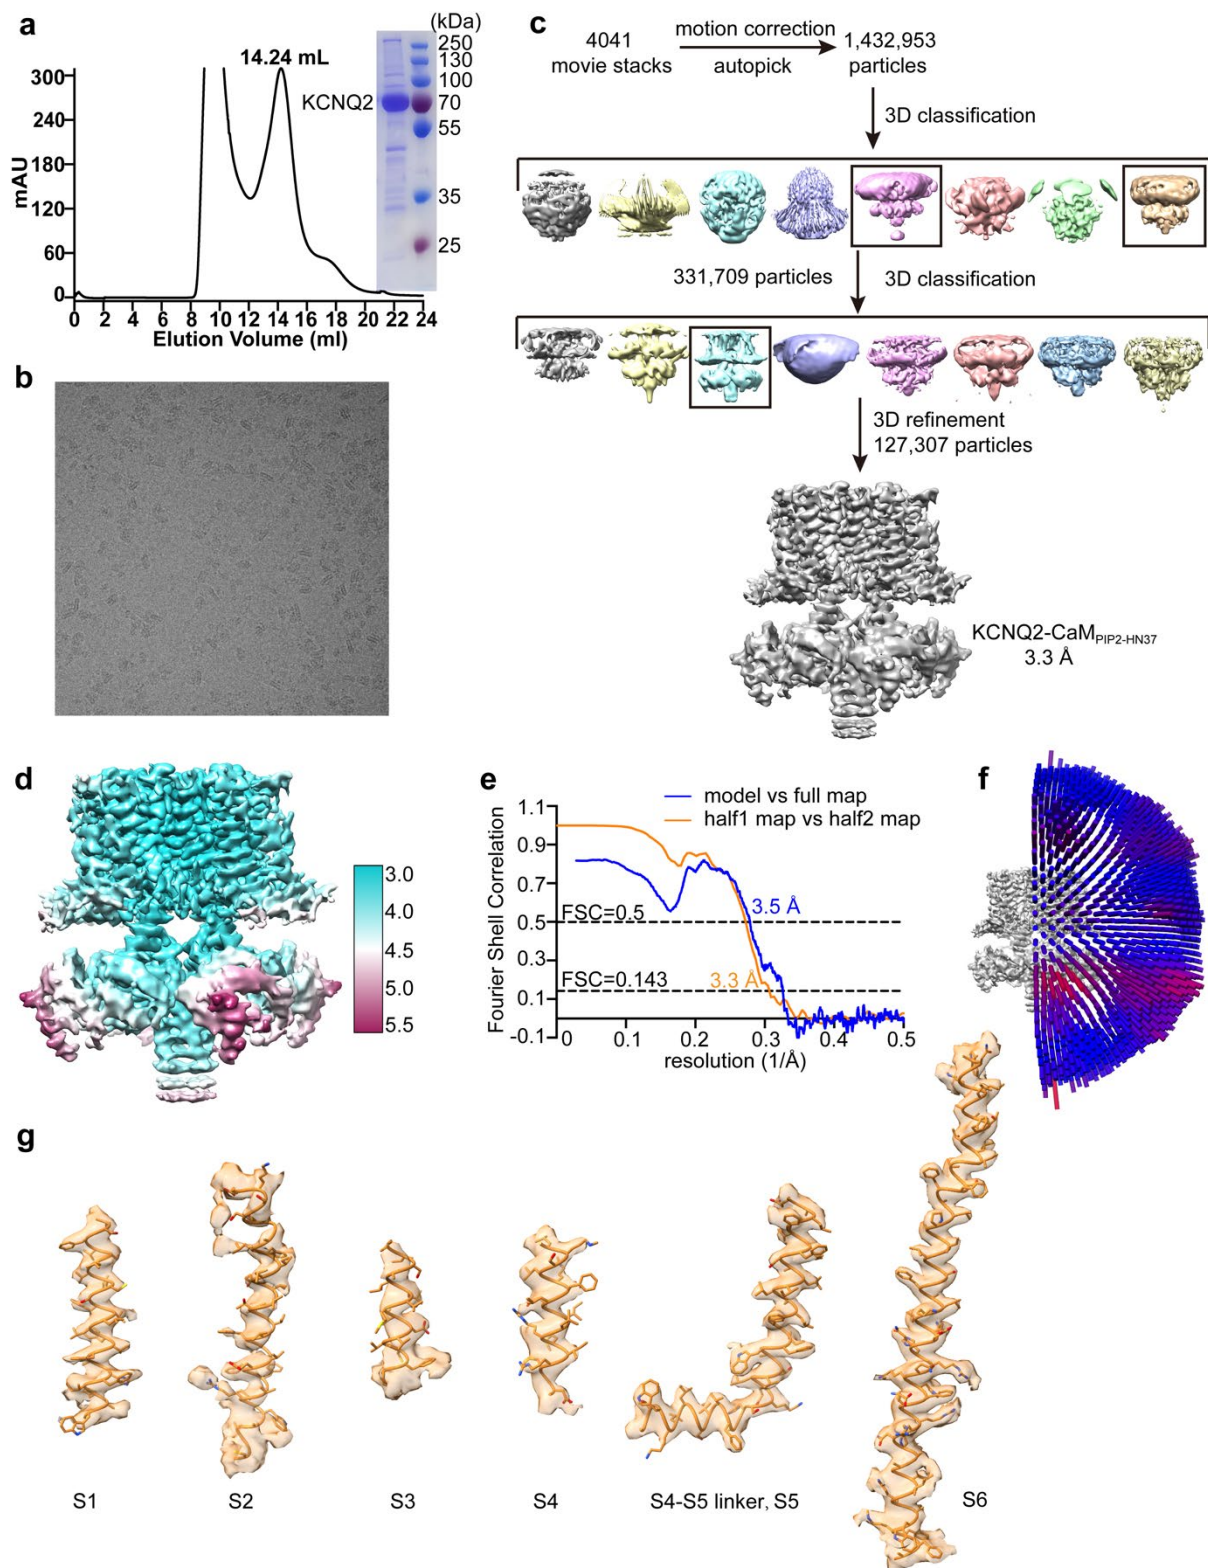

**Supplementary Fig. 9 Structure determination of KCNQ2-CaM<sub>PIP2-HN37</sub>.** **a** Size-exclusion chromatography of KCNQ2-CaM on Superose 6 (GE Healthcare) and SDS-PAGE analysis of the final sample for KCNQ2-CaM<sub>PIP2-HN37</sub>. The y axis is in mili absorption unit (mAU). Source data are included in the Source Data file. **b** Representative cryo-EM micrograph of KCNQ2-

CaM<sub>PIP2-HN37</sub>. **c** Flowchart of image processing for KCNQ2-CaM<sub>PIP2-HN37</sub> particles. **d** The density map of KCNQ2-CaM<sub>PIP2-HN37</sub> colored by local resolution. The local resolution was estimated with RELION 3.1 and generated in Chimera. **e** The Gold-standard Fourier shell correlation (FSC) curves of the final 3D reconstruction of KCNQ2-CaM<sub>PIP2-HN37</sub>, and the FSC curve for cross-validation between the map and the model of KCNQ2-CaM<sub>PIP2-HN37</sub>. **f** Euler angle distribution of KCNQ2-CaM<sub>PIP2-HN37</sub> particles used in the final 3D reconstruction, with the heights of the cylinders corresponding to the number of particles. **g** Sample maps of the KCNQ2-CaM<sub>PIP2-N37</sub> structure.

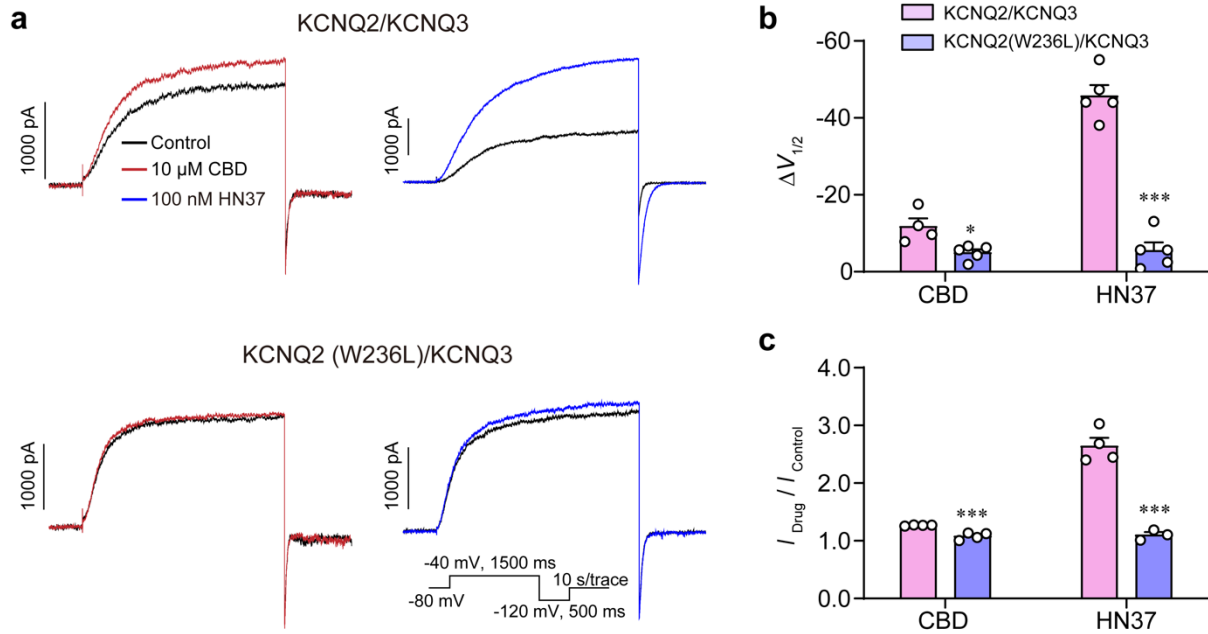

**Supplementary Fig. 10 The activation effects of CBD and HN37 on the KCNQ2/KCNQ3 and KCNQ2(W236L)/KCNQ3 hetero-tetramers.** **a** Representative current traces of KCNQ2/KCNQ3 and KCNQ2(W236L)/KCNQ3 hetero-tetramers before and after application of 10 μM CBD or 100 nM HN37. *Inset*, the recording protocol. **b** The half-maximal activation voltage shift ( $\Delta V_{1/2}$ ) for CBD or HN37 on the hetero-tetramers calculated from the panel **a**. Data are presented as mean  $\pm$  SEM. An unpaired two-tailed t-test was used to make a comparison between the KCNQ2/KCNQ3 and KCNQ2(W236L)/KCNQ3. *p* and *n* values are \**p* = 0.0143 and *n* = 4 or 5 for CBD, \*\*\**p* = 0.0001 and *n* = 5 for HN37. *n* represents the number of experiments from individual cells. **c** The activation efficacy ( $I_{Drug} / I_{Control}$ ) for CBD or HN37 on the hetero-tetramers calculated from the panel **a**. Data are presented as mean  $\pm$  SEM. An unpaired two-tailed t-test was used to make a comparison between the KCNQ2/KCNQ3 and KCNQ2(W236L)/KCNQ3. *p* and *n* values are \*\*\**p* = 0.0009 and *n* = 4 for CBD, \*\*\**p* = 0.0003 and *n* = 3 or 4 for HN37. *n* indicates the number of experiments from individual cells. Source data are included in the Source Data file.

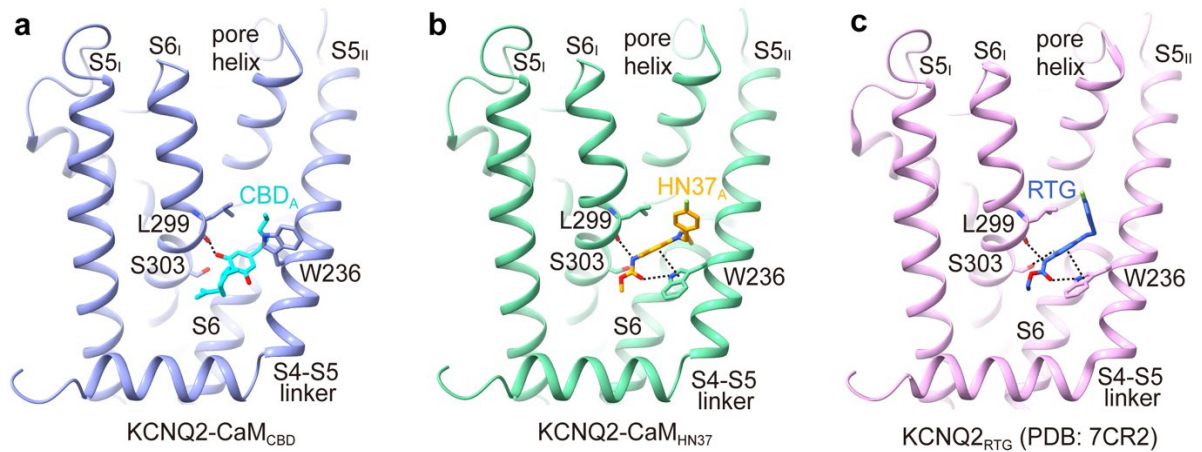

**Supplementary Fig. 11 Comparison of ligand binding sites in KCNQ2.** **a** The  $\text{CBD}_A$  binding site in  $\text{KCNQ2-CaM}_{\text{CBD}}$ . The side chains of Trp236, Lue299, and Ser303 are shown as sticks. **b** The  $\text{HN37}_A$  binding site in  $\text{KCNQ2-CaM}_{\text{HN37}}$ . The side chains of Trp236, Lue299, and Ser303 are shown as sticks. **c** The RTG binding site in  $\text{KCNQ2}_{\text{RTG}}$  (PDB:7CR2). The side chains of Trp236, Lue299, and Ser303 are shown as sticks.

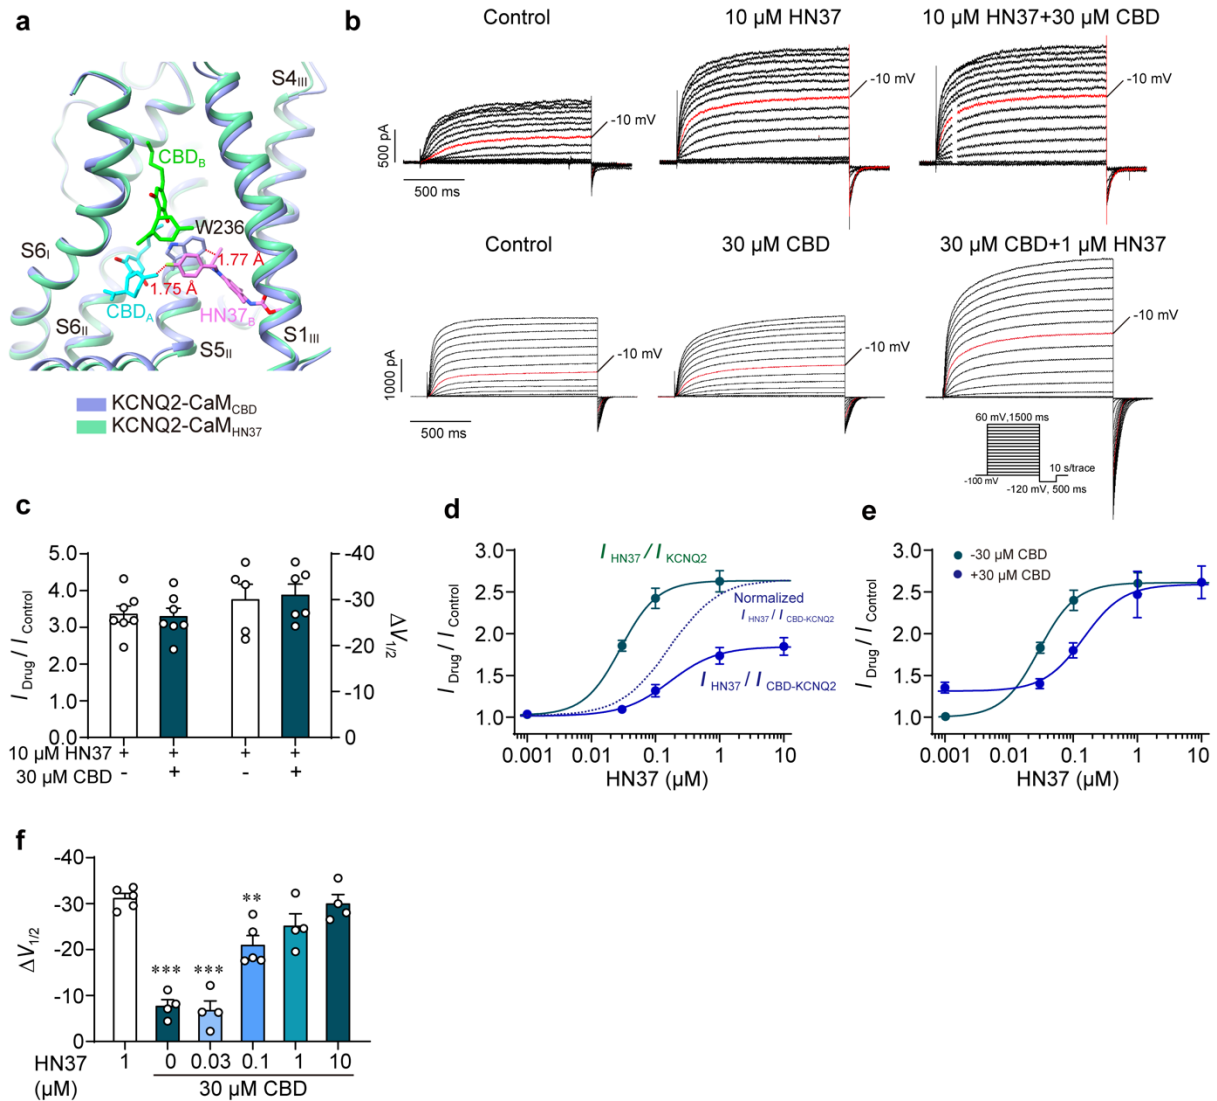

**Supplementary Fig. 12 The competitive binding of HN37 and CBD.** **a** Structural alignment of KCNQ2-CaM<sub>CBD</sub> and KCNQ2-CaM<sub>HN37</sub>. **b** Representative current traces of KCNQ2 channels after sequential perfusion of 10  $\mu$ M HN37 and 30  $\mu$ M CBD + 10  $\mu$ M HN37 (up), 30  $\mu$ M CBD and 30  $\mu$ M CBD + 1  $\mu$ M HN37 (down). **c** The activation efficacy ( $I_{Drug} / I_{Control}$ ) and half maximal activation voltage shift ( $\Delta V_{1/2}$ ) for 10  $\mu$ M HN37 on KCNQ2 channels with or without 30  $\mu$ M CBD. Data are presented as mean  $\pm$  SEM. An unpaired two-tailed t-test was used to make a comparison between the 10  $\mu$ M HN37 and 10  $\mu$ M HN37 + 30  $\mu$ M CBD. For  $I_{drug} / I_{control}$ ,  $p = 0.8433$  for 10  $\mu$ M HN37 + 30  $\mu$ M CBD ( $n = 7$ ) compared to 10  $\mu$ M HN37 ( $n = 7$ ); for  $\Delta V_{1/2}$ ,  $p = 0.8074$  for 10  $\mu$ M HN37 + 30  $\mu$ M CBD ( $n = 6$ ) compared to 10  $\mu$ M HN37 ( $n = 5$ ).  $n$  indicates the number of experiments from individual cells. **d** Dose-response curves of the activation efficacy measured at -10 mV for HN37 on KCNQ2 or CBD-bound KCNQ2

channel. The maximal activation efficacy of HN37 on CBD-bound KCNQ2 channel ( $I_{\text{HN37}} / I_{\text{CBD-KCNQ2}}$ ) dramatically decreased in the comparison of native KCNQ2 channel ( $I_{\text{HN37}} / I_{\text{KCNQ2}}$ ). Dara are presented as mean  $\pm$  SEM. n = 3-8 for  $I_{\text{HN37}} / I_{\text{CBD-KCNQ2}}$  and 5-8 for  $I_{\text{HN37}} / I_{\text{KCNQ2}}$ . n indicates the number of experiments from individual cells. **e** Dose-response curves of the activation efficacy for HN37 on KCNQ2 in the absence and presence of 30  $\mu\text{M}$  CBD. Dara are presented as mean  $\pm$  SEM. For in the absence of 30  $\mu\text{M}$  CBD, n = 5-8; for in the presence of 30  $\mu\text{M}$  CBD, n = 3-8. n indicates the number of experiments from individual cells. **f** The  $\Delta V_{1/2}$  for HN37 on KCNQ2 channels with or without 30  $\mu\text{M}$  CBD. Dara are presented as mean  $\pm$  SEM. One-way ANOVA with Dunnett's multiple comparisons test was applied. *p* and n values compared to 1  $\mu\text{M}$  HN37 (n = 5) were \*\*\**p* = 0.0001 and n = 4 for 30  $\mu\text{M}$  CBD, \*\*\**p* = 0.0001 and n = 4 for 0.03  $\mu\text{M}$  HN37 + 30  $\mu\text{M}$  CBD, \*\**p* = 0.0025 and n = 5 for 0.1  $\mu\text{M}$  HN37 + 30  $\mu\text{M}$  CBD, *p* = 0.1246 and n = 4 for 1  $\mu\text{M}$  HN37 + 30  $\mu\text{M}$  CBD, and *p* = 0.9897 and n = 4 for 10  $\mu\text{M}$  HN37 + 30  $\mu\text{M}$  CBD. n indicates the number of experiments from individual cells. For **c-f**, source data are included in the Source Data file.

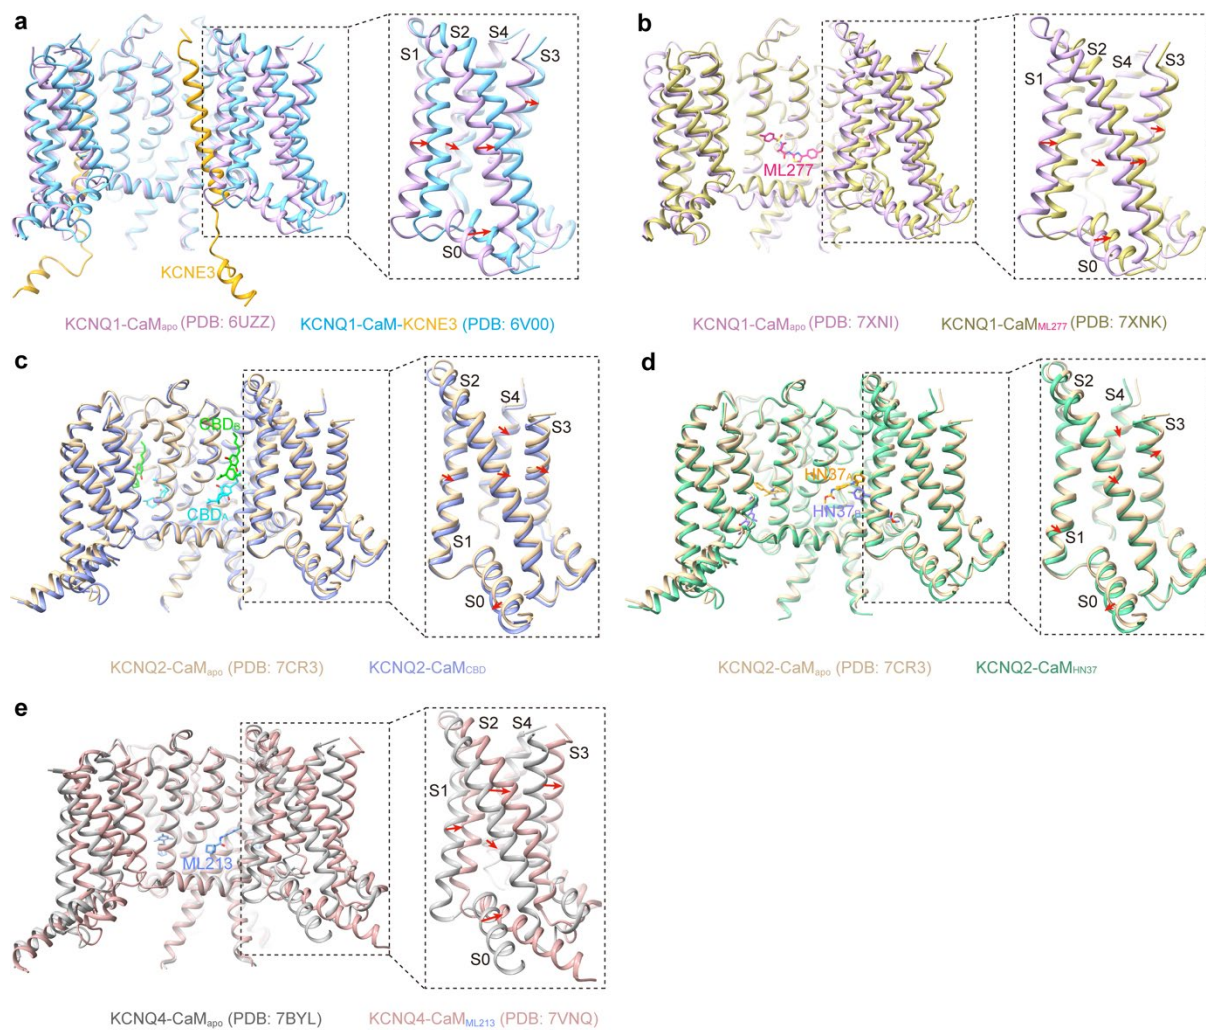

**Supplementary Fig. 13 Analyses of the modulation of KCNQ channels by KCNE and ligands.** **a** Structural comparison of KCNQ1-CaM<sub>apo</sub> (PDB: 6UZZ) and KCNQ1-CaM-KCNE3 (PDB: 6V00). Red arrows indicate the shift of VSD upon the KCNE3 binding. **b** Structural comparison of KCNQ1-CaM<sub>apo</sub> (PDB: 7XNI) and KCNQ1-CaM<sub>ML277</sub> (PDB: 7XNK). Red arrows indicate the shift of VSD upon the ML277 binding. **c** Structural comparison of KCNQ2-CaM<sub>apo</sub> (PDB: 7CR3) and KCNQ2-CaM<sub>CBD</sub>. Red arrows indicate the shift of VSD upon the CBD binding. **d** Structural comparison of KCNQ2-CaM<sub>apo</sub> (PDB: 7CR3) and KCNQ2-CaM<sub>HN37</sub>. Red arrows indicate the shift of VSD upon the HN37 binding. **e** Structural comparison of KCNQ4-CaM<sub>apo</sub> (PDB: 7BYL) and KCNQ4-CaM<sub>ML213</sub>. Red arrows indicate the shift of VSD upon the ML213 binding.

**Supplementary Table 1. Data collection and refinement statistics.**

|                                           | KCNQ2-<br>CaM <sub>PIP2(-)</sub><br>(EMD-35884)<br>(PDB 8J05) | KCNQ2-<br>CaM <sub>CBD</sub><br>(EMD-35879)<br>(PDB 8J00) | KCNQ2-<br>CaM <sub>CBD-PIP2</sub><br>(EMD-35880)<br>(PDB 8J01) | KCNQ2-<br>CaM <sub>F104A-CBD-<br/>PIP2(-)-I</sub><br>(EMD-35882)<br>(PDB 8J03) | KCNQ2-<br>CaM <sub>F104A-CBD-<br/>PIP2-II</sub><br>(EMD-35881)<br>(PDB 8J02) |
|-------------------------------------------|---------------------------------------------------------------|-----------------------------------------------------------|----------------------------------------------------------------|--------------------------------------------------------------------------------|------------------------------------------------------------------------------|
| <b>Data collection and processing</b>     |                                                               |                                                           |                                                                |                                                                                |                                                                              |
| Magnification                             | 130000                                                        | 130000                                                    | 130000                                                         | 130000                                                                         | 130000                                                                       |
| Voltage (kV)                              | 300                                                           | 300                                                       | 300                                                            | 300                                                                            | 300                                                                          |
| Electron exposure (e-/Å <sup>2</sup> )    | ~ 52                                                          | ~ 52                                                      | ~ 52                                                           | ~ 52                                                                           | ~ 52                                                                         |
| Defocus range (µm)                        | -0.8 to -1.5                                                  | -0.8 to -1.5                                              | -0.8 to -1.5                                                   | -0.8 to -1.5                                                                   | -0.8 to -1.5                                                                 |
| Pixel size (Å)                            | 0.93                                                          | 0.93                                                      | 0.93                                                           | 0.93                                                                           | 0.93                                                                         |
| Symmetry imposed                          | <i>C4</i>                                                     | <i>C4</i>                                                 | <i>C4</i>                                                      | <i>C4</i>                                                                      | <i>C4</i>                                                                    |
| Initial particle images (no.)             | 2,620,661                                                     | 1,034,485                                                 | 2,130,327                                                      | 1,792,694                                                                      | 1,792,694                                                                    |
| Final particle images (no.)               | 118,013                                                       | 99,018                                                    | 66,773                                                         | 147,292                                                                        | 35,534                                                                       |
| Map resolution (Å)                        | 2.7                                                           | 3.0                                                       | 3.1                                                            | 2.7                                                                            | 3.5                                                                          |
| FSC threshold                             | 0.143                                                         | 0.143                                                     | 0.143                                                          | 0.143                                                                          | 0.143                                                                        |
| <b>Refinement</b>                         |                                                               |                                                           |                                                                |                                                                                |                                                                              |
| Initial model used (PDB code)             | 7CR3                                                          | 7CR3                                                      | 7CR3                                                           | 7CR3                                                                           | 7CR3                                                                         |
| Model resolution (Å)                      | 2.9                                                           | 3.3                                                       | 3.3                                                            | 3.2                                                                            | 3.6                                                                          |
| FSC threshold                             | 0.5                                                           | 0.5                                                       | 0.5                                                            | 0.5                                                                            | 0.5                                                                          |
| Map sharpening B factor (Å <sup>2</sup> ) | -40                                                           | -40                                                       | -30                                                            | -40                                                                            | -40                                                                          |
| Model composition                         |                                                               |                                                           |                                                                |                                                                                |                                                                              |
| Non-hydrogen atoms                        | 15876                                                         | 15240                                                     | 16248                                                          | 15232                                                                          | 16132                                                                        |
| Protein residues                          | 1960                                                          | 1876                                                      | 1988                                                           | 1892                                                                           | 1988                                                                         |
| ligands                                   | 0                                                             | 8                                                         | 12                                                             | 4                                                                              | 8                                                                            |
| B factors (Å <sup>2</sup> )               |                                                               |                                                           |                                                                |                                                                                |                                                                              |
| Protein                                   | 154.57                                                        | 164.94                                                    | 115.94                                                         | 182.16                                                                         | 140.46                                                                       |
| R.m.s. deviations                         |                                                               |                                                           |                                                                |                                                                                |                                                                              |
| Bond lengths (Å)                          | 0.003                                                         | 0.003                                                     | 0.003                                                          | 0.003                                                                          | 0.003                                                                        |
| Bond angles (°)                           | 0.469                                                         | 0.559                                                     | 0.548                                                          | 0.522                                                                          | 0.579                                                                        |
| Validation                                |                                                               |                                                           |                                                                |                                                                                |                                                                              |
| MolProbity score                          | 1.71                                                          | 1.67                                                      | 1.71                                                           | 2.16                                                                           | 2.01                                                                         |
| Clashscore                                | 8.75                                                          | 9.81                                                      | 10.36                                                          | 11.83                                                                          | 15.74                                                                        |
| Rotamer outliers (%)                      | 0.72                                                          | 0.00                                                      | 0.60                                                           | 1.39                                                                           | 0.48                                                                         |
| Ramachandran plot                         |                                                               |                                                           |                                                                |                                                                                |                                                                              |
| Favored (%)                               | 96.37                                                         | 97.13                                                     | 96.98                                                          | 95.65                                                                          | 95.50                                                                        |
| Allowed (%)                               | 3.63                                                          | 2.87                                                      | 3.02                                                           | 4.35                                                                           | 4.50                                                                         |
| Outliers (%)                              | 0.00                                                          | 0.00                                                      | 0.00                                                           | 0.00                                                                           | 0.00                                                                         |

**Supplementary Table 1. Data collection and refinement statistics (continued).**

|                                           | KCNQ2-CaM <sub>HN37</sub><br>(EMD-35877)<br>(PDB 8IZY) | KCNQ2-CaM <sub>HN37</sub> -PIP2(-)<br>(EMD-35883)<br>(PDB 8J04) | KCNQ2-CaM <sub>PIP2</sub> -HN37<br>(EMD-37270)<br>(PDB 8W4U) |
|-------------------------------------------|--------------------------------------------------------|-----------------------------------------------------------------|--------------------------------------------------------------|
| <b>Data collection and processing</b>     |                                                        |                                                                 |                                                              |
| Magnification                             | 130000                                                 | 130000                                                          | 130000                                                       |
| Voltage (kV)                              | 300                                                    | 300                                                             | 300                                                          |
| Electron exposure (e-/Å <sup>2</sup> )    | ~ 64                                                   | ~ 52                                                            | ~ 52                                                         |
| Defocus range (µm)                        | -1.1 to -1.3                                           | -0.8 to -1.5                                                    | -0.8 to -1.5                                                 |
| Pixel size (Å)                            | 1.014                                                  | 0.93                                                            | 0.93                                                         |
| Symmetry imposed                          | <i>C4</i>                                              | <i>C4</i>                                                       | <i>C4</i>                                                    |
| Initial particle images (no.)             | 1,265,118                                              | 1,402,135                                                       | 1,432,953                                                    |
| Final particle images (no.)               | 367,290                                                | 146,702                                                         | 127,307                                                      |
| Map resolution (Å)                        | 2.5                                                    | 2.7                                                             | 3.3                                                          |
| FSC threshold                             | 0.143                                                  | 0.143                                                           | 0.143                                                        |
| <b>Refinement</b>                         |                                                        |                                                                 |                                                              |
| Initial model used (PDB code)             | 7CR3                                                   | 7CR3                                                            | 7CR3                                                         |
| Model resolution (Å)                      | 2.9                                                    | 2.8                                                             | 3.5                                                          |
| FSC threshold                             | 0.5                                                    | 0.5                                                             | 0.5                                                          |
| Map sharpening B factor (Å <sup>2</sup> ) | -70                                                    | -30                                                             | -75                                                          |
| Model composition                         |                                                        |                                                                 |                                                              |
| Non-hydrogen atoms                        | 8416                                                   | 15580                                                           | 16148                                                        |
| Protein residues                          | 1004                                                   | 1900                                                            | 1988                                                         |
| ligands                                   | 8                                                      | 8                                                               | 8                                                            |
| B factors (Å <sup>2</sup> )               |                                                        |                                                                 |                                                              |
| Protein                                   | 81.26                                                  | 166.13                                                          | 148.83                                                       |
| R.m.s. deviations                         |                                                        |                                                                 |                                                              |
| Bond lengths (Å)                          | 0.003                                                  | 0.003                                                           | 0.003                                                        |
| Bond angles (°)                           | 0.529                                                  | 0.507                                                           | 0.590                                                        |
| Validation                                |                                                        |                                                                 |                                                              |
| MolProbity score                          | 1.61                                                   | 1.72                                                            | 1.83                                                         |
| Clashscore                                | 7.39                                                   | 8.92                                                            | 14.12                                                        |
| Rotamer outliers (%)                      | 0.71                                                   | 0.99                                                            | 0.54                                                         |
| Ramachandran plot                         |                                                        |                                                                 |                                                              |
| Favored (%)                               | 96.76                                                  | 96.41                                                           | 97.03                                                        |
| Allowed (%)                               | 3.24                                                   | 3.59                                                            | 2.97                                                         |
| Outliers (%)                              | 0.00                                                   | 0.00                                                            | 0.00                                                         |
