# Supplementary material for: Ligand activation mechanisms of human KCNQ2 channel
Source: Nat Commun. 2023 Oct 19;14:6632. doi: 10.1038/s41467-023-42416-x (PMC10587151; doi:10.1038/s41467-023-42416-x)
Supplement: Supplementary file 4 — Supplementary Data 1 [file 41467_2023_42416_MOESM4_ESM.xlsx]

## Sheet: Sheet1
	mutation	primers
	hKCNQ2-R87A	5'-cagccgcgcggcgcctccagcacgtt-3'
		5'-aacgtgctggaggcgccgcgcggctg-3'
	hKCNQ2-R89A	5'-cgcccagccggccggccgctcc-3'
		5'-ggagcggccggccggctgggcg-3'
	hKCNQ2-F100A	5'-ggagaaaaccaggagggccacgtaggcgtggtag-3'
		5'-ctaccacgcctacgtggccctcctggttttctcc-3'
	hKCNQ2-F104A	5'-gcacgaggcaggaggcaaccaggaggaacacg-3'
		5'-cgtgttcctcctggttgcctcctgcctcgtgc-3'
	hKCNQ2-M211A	5'-tccccgccggtccgcgcggatcatccgc-3'
		5'-gcggatgatccgcgcggaccggcgggga-3'
	hKCNQ2-R214A	5'-caggtgcctcccgcccggtccatgcg-3'
		5'-cgcatggaccgggcgggaggcacctg-3'
	hKCNQ2-W236A	5'-aggaagccgatgtacgcggcagtgaccagctc-3
		5'-gagctggtcactgccgcgtacatcggcttcct-3'
	hKCNQ2-W236L	5'-ggaagccgatgtacaaggcagtgaccagc-3'
		5'-gctggtcactgccttgtacatcggcttcc-3'
	hKCNQ2-F240A	5'-ccaggatgagacaaagggcgccgatgtaccaggcag-3'
		5'-ctgcctggtacatcggcgccctttgtctcatcctgg-3'
	hKCNQ2-L272A	5'-tggtcagcgtgatcgcgccccaccagagtg-3'
		5'-cactctggtggggcgcgatcacgctgacca-3'
	hKCNQ2-T296A	5'-gagggtgaaggctgccgcaaggagcc-3
		5'-ggctccttgcggcagccttcaccctc-3'
	hKCNQ2-L299A	5'-aaggagacaccgatggcggtgaaggttgccgc-3'
		5'-gcggcaaccttcaccgccatcggtgtctcctt-3'
	hKCNQ2-K327A	5'-cctcttctcaaagtgcgcctgcctgtgctgctcc-3'
		5'-ggagcagcacaggcaggcgcactttgagaagagg-3'
