# Supplementary material for: Ligand activation mechanisms of human KCNQ2 channel
Source: Nat Commun. 2023 Oct 19;14:6632. doi: 10.1038/s41467-023-42416-x (PMC10587151; doi:10.1038/s41467-023-42416-x)
Supplement: Supplementary file 9 — Source Data [file 41467_2023_42416_MOESM9_ESM.xlsx]

## Sheet: Fig 1f-h
Fig 1f	CBD (uM)	IDrug / IControl
	0.1	1.01314	0.99695	1.00225
	1	1.07333	0.933626	1.02464
	3	1.19428	1.61792	1.03875	1.4182	1.08648
	10	1.56552	1.42071	1.82222	1.42891	1.52357
	30	1.33623	1.95129	1.86508	1.70143
Fig 1g	Voltage (mV)	Control					10 μM CBD
	-90	0.000155	0.005705	0.001082	0.000528	0.002126	0.001049	0.009642	0.005228	0.000742	0.004497
	-80	0.000401	0.004117	0.001371	1.2e-05	0.004011	0.002816	0.015777	0.004551	0.000863	0.002816
	-70	0.00075	0.013074	0.002752	0.000765	0.005249	0.001046	0.00231	0.018276	0.001832	0.008626
	-60	0.001889	0.019841	0.03082	0.002768	0.017143	0.016608	0.028079	0.107601	0.004695	0.043477
	-50	0.019302	0.03555	0.130659	0.012661	0.068989	0.087361	0.060757	0.249863	0.037745	0.135819
	-40	0.10657	0.091636	0.25768	0.055591	0.165728	0.227606	0.145638	0.373694	0.108835	0.270542
	-30	0.261977	0.179858	0.368615	0.13943	0.314834	0.377201	0.277065	0.477118	0.199669	0.427943
	-20	0.413237	0.289091	0.465322	0.239663	0.417453	0.499907	0.404058	0.556416	0.309785	0.599896
	-10	0.550138	0.391932	0.550378	0.347336	0.557539	0.60708	0.517979	0.639384	0.420987	0.717697
	0	0.657145	0.51884	0.628914	0.455202	0.639974	0.680347	0.630505	0.714815	0.529789	0.844788
	10	0.741547	0.617866	0.688212	0.565248	0.70595	0.741971	0.727769	0.783044	0.618985	0.902508
	20	0.803064	0.738428	0.75032	0.666238	0.751732	0.79865	0.805929	0.84764	0.705556	0.969561
	30	0.857026	0.849266	0.80235	0.751656	0.844776	0.847512	0.860079	0.904427	0.788456	0.976372
	40	0.918306	0.899864	0.862907	0.830546	0.895341	0.890586	0.90187	0.937829	0.844572	0.974114
	50	0.952186	0.946724	0.924445	0.883832	0.933157	0.92814	0.949946	0.954792	0.891952	0.989524
	60	0.986685	0.978769	0.946874	0.94281	0.950971	0.959068	0.985195	0.986803	0.950615	1
	70	1	1	1	1	1	1	1	1	1	0.978487
Fig 1h		DV1/2 (mV)
	WT	-8.05	-11.35	-12.68	-7.08	-11.38
	F104A	-3.45	-3.59	-2.14	-3.59	-7.97
	W236A	-5.92	-7.01	-4.51
	L272A	-7.75	-6.87	-3.39	-2.17	-4.04
	T296A	-5.05	-8.08	-1.61	-15.13	-7.33

## Sheet: Fig 2c-d
Fig 2c	Voltage (mV)	WT													K327A											R87A								R214A										R89A
	-90	0.008876	0.019815	0.002144	0.004364	0.004361	0.000945	0.003046	0.001291	0.005729	0.001975	0.00967	0.000185		0.002506	0.002027	0.001539	0.003634	0.004741	0.001592	0.000417	0.004218	0.003103	1.628e-05		0.002548	0.015723	0.00183	0.01945	0.001451	0.001046	0.005287		0.055187	0.00841	0.013613	0.012047	0.009993	0.005448	0.031971	0.007357	0.008219		0.030444	0.028035	0.031643	0.011361	0.007935	0.021107
	-80	0.009518	0.009576	0.005075	0.004233	0.000624	0.002313	0.002584	0.003237	0.003739	0.00156	0.003162	0.000315		0.005166	0.024654	0.005781	0.00828	0.007999	0.001044	0.005902	0.074556	0.002651	0.0074422		0.004628	0.026693	0.001765	0.037961	0.000436	0.002491	0.012031		0.010523	0.0165	0.007958	0.052173	0.012431	0.004181	0.008586	0.008438	0.016923		0.002778	0.019392	0.022267	0.015217	0.02461	0.009142
	-70	0.00898	0.019499	0.002475	0.018888	0.001715	0.011515	0.00377	0.002454	0.010855	0.004511	0.010755	0.000432		0.001519	0.009391	0.003324	0.002576	0.014339	0.005749	0.001479	0.04974	0.002061	0.0064253		0.007785	0.038591	0.000121	0.043787	0.000558	0.00769	0.006341		0.052481	0.002463	0.001207	0.017949	0.001496	0.001818	0.064524	0.014564	0.016711		0.062358	0.037263	0.119069	0.019712	0.009107	0.018003
	-60	0.019478	0.007678	0.007599	0.03104	0.008946	0.004592	0.007336	0.000238	0.00882	1.88e-05	0.026488	0.000497		0.003197	0.013778	0.00073	0.005914	0.001661	0.000645	0.000391	0.00834	0.013796	0.0004287		0.009432	0.048866	0.008568	0.054774	0.008483	0.038251	0.009891		0.034611	0.011293	0.007337	0.018636	0.059168	0.005299	0.138136	0.01504	0.019512		0.109006	0.167459	0.127625	0.041955	0.017846	0.029735
	-50	0.044135	0.077845	0.051389	0.126338	0.056001	0.019731	0.037886	0.007015	0.023555	0.000367	0.006398	0.00837		0.003842	0.013397	0.002637	0.030307	0.013075	0.009115	0.012386	0.042072	0.015818	0.0250487		0.044233	0.073069	0.042239	0.079276	0.045598	0.125714	0.051565		0.050971	0.001993	0.001183	0.052021	0.087986	0.01266	0.252673	0.006819	0.021872		0.195284	0.200433	0.041218	0.062811	0.073791	0.03263
	-40	0.14883	0.190408	0.130909	0.25465	0.147504	0.048463	0.144355	0.065728	0.092595	0.035536	0.057898	0.037522		0.03383	0.010763	0.019365	0.053009	0.01735	0.001706	0.025157	0.013563	0.004223	0.0070791		0.12811	0.124465	0.108959	0.141592	0.117723	0.238438	0.136216		0.106856	0.055504	0.059318	0.131921	0.135834	0.055592	0.340803	0.090474	0.03563		0.22708	0.294979	0.102913	0.128118	0.134563	0.083033
	-30	0.294494	0.313205	0.220103	0.386888	0.24835	0.162542	0.259033	0.214678	0.237103	0.112206	0.101002	0.130227		0.097824	0.062031	0.062397	0.064857	0.073347	0.060324	0.092424	0.092956	0.042541	0.0534707		0.239632	0.226601	0.196917	0.276107	0.21243	0.346107	0.259136		0.265049	0.509953	0.187983	0.316513	0.327071	0.15622	0.438924	0.08654	0.10324		0.394957	0.459365	0.28097	0.285838	0.325826	0.359598
	-20	0.423597	0.467374	0.310407	0.490342	0.339629	0.291041	0.367682	0.383187	0.420157	0.256802	0.265911	0.264508		0.230784	0.142179	0.180665	0.419367	0.155008	0.142331	0.212633	0.212887	0.107945	0.179764		0.349989	0.347931	0.284282	0.395341	0.306356	0.438927	0.410186		0.410078	0.508478	0.361128	0.47613	0.503018	0.291335	0.44558	0.229903	0.277863		0.481158	0.543849	0.395998	0.485751	0.496893	0.659761
	-10	0.537499	0.543151	0.409473	0.585061	0.446786	0.440275	0.476147	0.540904	0.579706	0.387488	0.450664	0.418547		0.35964	0.262014	0.329576	0.362108	0.314007	0.284309	0.337415	0.376801	0.272203	0.360644		0.449028	0.490995	0.39543	0.522382	0.425269	0.523532	0.521199		0.560624	0.571825	0.510445	0.614651	0.647278	0.411462	0.545357	0.419888	0.451999		0.505014	0.705775	0.714346	0.661203	0.63558	0.843957
	0	0.610271	0.630617	0.523163	0.648546	0.53633	0.55849	0.562198	0.670495	0.695554	0.537531	0.585139	0.542187		0.502575	0.418152	0.486721	0.523395	0.504319	0.452944	0.507818	0.523144	0.434514	0.572729		0.555752	0.582211	0.483202	0.615945	0.518398	0.603471	0.645572		0.613754	0.648006	0.65041	0.773609	0.787122	0.525683	0.554827	0.581263	0.621683		0.584771	0.86531	0.714967	0.74884	0.702931	0.938092
	10	0.671979	0.668667	0.628048	0.682157	0.617114	0.676403	0.647969	0.731002	0.767988	0.650994	0.691483	0.651642		0.628505	0.536187	0.641709	0.641199	0.667055	0.555575	0.629131	0.655339	0.579962	0.694467		0.640339	0.655007	0.587392	0.666551	0.627501	0.683091	0.738887		0.739627	0.712578	0.75132	0.793018	0.843829	0.634047	0.553422	0.700529	0.71656		0.699767	0.868628	0.921691	0.823089	0.840463	0.999635
	20	0.744028	0.749602	0.696346	0.73956	0.701656	0.759122	0.690068	0.829621	0.8335	0.74541	0.803804	0.736431		0.699501	0.659433	0.754936	0.749276	0.802633	0.694816	0.756999	0.788036	0.692147	0.794717		0.714196	0.731477	0.676098	0.763615	0.719235	0.750473	0.82078		0.770163	0.72297	0.864185	0.839727	0.859834	0.688917	0.69912	0.776718	0.81753		0.779045	0.885923	0.958162	0.865206	0.884459	0.992756
	30	0.804013	0.80191	0.750379	0.808401	0.770254	0.844671	0.819369	0.870702	0.895737	0.816927	0.888721	0.822232		0.804215	0.76244	0.834357	0.842053	0.847045	0.809694	0.85346	0.848875	0.738734	0.853144		0.783906	0.805839	0.765134	0.804969	0.806065	0.813215	0.868118		0.866683	1	0.912699	0.724583	0.77626	0.757182	0.747653	0.838615	0.882947		0.839208	0.928171	0.981941	0.928509	0.930025	0.969279
	40	0.85197	0.854668	0.806189	0.870655	0.839187	0.898689	0.863707	0.93334	0.920522	0.879378	0.928917	0.882118		0.878489	0.852484	0.911793	0.897955	0.883959	0.84289	0.911284	0.89563	0.899109	0.893458		0.865334	0.864748	0.837587	0.870945	0.871824	0.888581	0.918928		0.872075	0.987007	0.927662	0.899139	0.916856	0.813497	0.970113	0.876439	0.925969		0.877682	0.940028	1	0.918901	0.954199	1
	50	0.927855	0.92672	0.926544	0.912289	0.903591	0.945157	0.897312	0.948218	0.938765	0.926493	0.95355	0.93624		0.928132	0.917823	0.947264	0.930884	0.858822	0.951534	0.975111	0.9217	0.904038	0.890944		0.911538	0.914426	0.878124	0.935755	0.906099	0.952505	0.936923		0.885478	0.947229	0.857208	0.929165	0.883058	0.857102	0.941981	0.938243	0.941822		0.904057	0.990838		0.994413	0.982344
	60	0.958922	0.982427	0.944167	0.974013	0.949188	0.984533	1	0.98922	0.969992	0.959149	0.981987	0.97148		1	0.969453	0.993088	1	0.929798	0.980087	1	1	0.982744	1		0.975667	0.951787	0.951608	0.985074	0.967494	0.981009	0.982658		1	0.863314	1	1	1	0.922827	0.880487	0.972295	0.981136		0.954497	0.983756		0.972008	1
	70	1	1	1	1	1	1		1	1	1	1	1		0.998944	1	1	0.979837	1	1		0.950513	1	0.970012		1	1	1	1	1	1	1		0.984549	0.874793	0.86689	0.96867	0.871377	1	1	1	1		1	1		1	0.966061
Fig 2d		DV1/2 (mV)
	Q2 WT	-12.66	-14.42	-1.277	-21.27	-3.797	-4.492	-6.958	-12.32	-15.1	-2.502	-5.092	-2.926
	R87A	-4.747	-6.337	1.784	-9.01	-2.431	-14.23	-12.73
	R89A	-16.24	-26.89	-15.26	-18.73	-18.71	-24.85	-26.57
	R214A	-12.32	-21.31	-12.78	-19.98	-22.4	-3.162	-23.34	-4.436	-6.578
	K327A	1.308	8.156	1.148	-2.573	-1.51	5.48	0.9097	-1.324	5.963	-3.578
[truncated: 1 more columns]

## Sheet: Fig 5e-h
Fig 5e	HN37 (nM)	IDrug / IControl
	0.1	1.01315	0.994496	1.00044
	1	1.12119	1.15552	1.03349	1.00558	1.02893
	10	1.31892	1.31232	1.40156	1.4256
	30	1.7166	1.83283	1.91472	2.10778
	100	2.62187	2.94379	2.55917	2.84219
	1000	2.99688	2.92732	2.76316	2.53341
Fig 5f	HN37 (nM)	DV1/2 (mV)
	0.1	-2.52	-1.11	0.75
	1	-3.23	-0.79	-1.98
	10	-5.16	-14.33	-7.39	-10.08	-14.62
	30	-15.16	-14.17	-11.86
	100	-23.46	-22.23	-24.69
	1000	-32.94	-29.55	-28.18	-33.55	-31.75
Fig 5g		IDrug / IControl
	WT	2.62187	2.94379	2.55917	2.84219
	F100A	2.61418	2.51399	2.76534	2.37239	2.0947	2.37788
	M211A	2.19076	2.60577	2.72598
	W236A	1.08323	1.00111	0.985392	1.06249	1.05668	0.99239
	F240A	1.70574	2.13058	3.07716	2.02411	2.93062	3.32377
	L299A	0.944444	1.10315	0.930657	0.926569	0.952164
Fig 5h		DV1/2 (mV)
	WT	-22.23	-24.69	-22.67	-20.31	-25.99
	F100A	-26.77	-28.01	-22.14	-21.39
	M211A	-12.98	-6.87	-8.22	-11.15
	W236A	-1.42	-1.35	-0.4	-1.31
	F240A	-17.53	-13.09	-18.33	-20.71	-16.74
	L299A	-5.31	-7.67	-4.54

## Sheet: Supplementary Fig 1a
	Elution volume (ml)	mAU
	0.001	-0.00472
	0.002	-0.0044129
	0.003	-0.0049647
	0.004	-0.0055196
	0.005	-0.0057778
	0.006	-0.0057239
	0.007	-0.0057317
	0.008	-0.0058221
	0.009	-0.0063265
	0.01	-0.0065768
	0.011	-0.006901
	0.012	-0.0071422
	0.013	-0.0070184
	0.014	-0.0077928
	0.015	-0.0087884
	0.016	-0.0094871
	0.017	-0.010033
	0.018	-0.0103815
	0.019	-0.011253
	0.02	-0.0117502
	0.021	-0.0119475
	0.022	-0.012422
	0.023	-0.0130353
	0.024	-0.0135379
	0.025	-0.0133237
	0.026	-0.0127465
	0.027	-0.0129175
	0.028	-0.0138216
	0.029	-0.0134259
	0.031	-0.0118016
	0.032	-0.0113474
	0.033	-0.0113954
	0.034	-0.0102364
	0.035	-0.0092173
	0.036	-0.008941
	0.037	-0.0086385
	0.038	-0.0084473
	0.039	-0.0080037
	0.04	-0.0073212
	0.041	-0.0058316
	0.042	-0.0047275
	0.043	-0.0035672
	0.044	-0.0032931
	0.045	-0.0034361
	0.046	-0.0040188
	0.047	-0.0050686
	0.048	-0.0047059
	0.049	-0.0036359
	0.05	-0.0033869
	0.051	-0.0038517
	0.052	-0.0042313
	0.053	-0.0043576
	0.054	-0.0040044
	0.055	-0.0045537
	0.056	-0.00493
	0.057	-0.0052341
	0.058	-0.0055518
	0.059	-0.0053286
	0.06	-0.0010555
	0.061	0.0165002
	0.062	0.047838
	0.063	0.0791019
	0.064	0.107886
	0.065	0.140808
	0.066	0.174892
	0.067	0.204101
	0.068	0.230848
	0.069	0.257627
	0.07	0.281774
	0.071	0.301984
	0.072	0.322904
	0.073	0.34605
	0.074	0.370999
	0.076	0.396964
	0.077	0.42233
	0.078	0.445507
	0.079	0.466574
	0.08	0.485988
	0.081	0.504349
	0.082	0.522143
	0.083	0.539135
	0.084	0.555268
	0.085	0.571499
	0.086	0.58748
	0.087	0.601584
	0.088	0.614842
	0.089	0.628218
	0.09	0.639599
	0.091	0.649496
	0.092	0.660549
	0.093	0.67086
	0.094	0.681433
	0.095	0.692747
	0.096	0.706557
	0.097	0.719165
	0.098	0.731717
	0.099	0.745997
	0.1	0.759744
	0.101	0.774662
	0.102	0.790223
	0.103	0.806623
	0.104	0.824688
	0.105	0.843106
	0.106	0.860845
	0.107	0.878216
	0.108	0.896136
	0.109	0.912886
	0.11	0.924648
	0.111	0.923275
	0.112	0.909825
	0.113	0.897656
	0.114	0.888649
	0.115	0.876194
	0.116	0.864289
	0.117	0.856955
	0.118	0.850825
	0.119	0.844178
	0.121	0.840401
	0.122	0.83915
	0.123	0.836517
	0.124	0.831014
	0.125	0.823801
	0.126	0.815067
	0.127	0.809018
	0.128	0.805516
	0.129	0.803914
	0.13	0.80191
	0.131	0.800242
	0.132	0.799674
	0.133	0.798703
	0.134	0.798158
	0.135	0.797721
	0.136	0.798082
	0.137	0.798997
	0.138	0.798918
	0.139	0.801523
	0.14	0.804875
	0.141	0.809036
	0.142	0.811794
	0.143	0.816282
	0.144	0.819958
	0.145	0.82268
	0.146	0.822369
	0.147	0.822183
	0.148	0.821195
	0.149	0.819471
	0.15	0.817683
	0.151	0.81514
	0.152	0.811631
	0.153	0.80792
	0.154	0.801781
	0.155	0.794766
	0.156	0.787283
	0.157	0.780344
	0.158	0.773762
	0.159	0.768641
	0.16	0.762288
	0.161	0.754587
	0.162	0.746649
	0.163	0.738216
	0.164	0.728355
	0.166	0.717445
	0.167	0.706317
	0.168	0.694953
	0.169	0.683014
	0.17	0.672042
	0.171	0.66214
	0.172	0.651775
	0.173	0.64148
	0.174	0.630775
	0.175	0.620172
	0.176	0.609645
	0.177	0.596502
	0.178	0.58436
	0.179	0.572638
	0.18	0.56159
	0.181	0.550744
	0.182	0.541569
	0.183	0.532611
	0.184	0.523785
	0.185	0.514737
	0.186	0.504209
	0.187	0.495196
	0.188	0.488577
	0.189	0.479553
	0.19	0.471143
	0.191	0.463039
	0.192	0.456316
	0.193	0.449433
	0.194	0.441763
	0.195	0.434648
	0.196	0.429055
	0.197	0.42347
	0.198	0.417707
	0.199	0.411767
	0.2	0.406664
	0.201	0.401923
	0.202	0.396265
	0.203	0.391093
	0.204	0.387169
	0.205	0.384458
	0.206	0.382528
	0.207	0.380077
	0.208	0.376654
	0.209	0.37281
	0.211	0.37011
	0.212	0.36846
	0.213	0.366916
	0.214	0.365233
	0.215	0.364598
	0.216	0.364719
	0.217	0.36361
	0.218	0.363151
	0.219	0.36432
	0.22	0.365631
	0.221	0.367146
	0.222	0.369915
	0.223	0.373085
	0.224	0.376355
	0.225	0.379159
	0.226	0.383029
	0.227	0.387806
	0.228	0.392084
	0.229	0.396562
	0.23	0.402119
	0.231	0.408985
	0.232	0.413604
	0.233	0.419453
	0.234	0.425164
	0.235	0.430708
	0.236	0.437193
	0.237	0.44433
	0.238	0.450951
	0.239	0.458066
	0.24	0.46549
	0.241	0.471908
	0.242	0.478196
	0.243	0.484826
	0.244	0.49202
	0.245	0.498951
	0.246	0.5059
	0.247	0.51304
	0.248	0.520628
	0.249	0.529239
	0.25	0.537221
	0.251	0.545317
	0.252	0.553977
	0.253	0.562023
	0.254	0.570118
	0.255	0.577619
	0.257	0.584626
	0.258	0.591173
	0.259	0.597575
	0.26	0.604094
	0.261	0.61034
	0.262	0.61709
	0.263	0.623723
	0.264	0.629957
	0.265	0.635755
	0.266	0.641118
	0.267	0.647335
	0.268	0.652744
	0.269	0.657584
	0.27	0.661731
	0.271	0.665592
	0.272	0.669605
	0.273	0.672744
	0.274	0.677098
	0.275	0.681292
	0.276	0.684699
	0.277	0.688477
	0.278	0.6912
	0.279	0.693552
	0.28	0.695517
	0.281	0.696021
	0.282	0.698465
	0.283	0.701042
	0.284	0.703367
	0.285	0.705282
	0.286	0.706607
	0.287	0.707366
	0.288	0.707795
	0.289	0.707964
	0.29	0.707598
	0.291	0.708207
	0.292	0.708344
	0.293	0.708206
	0.294	0.708365
	0.295	0.70858
	0.296	0.708776
	0.297	0.708278
	0.298	0.707325
	0.299	0.706051
	0.3	0.704212
	0.302	0.701755
	0.303	0.69981
	0.304	0.698006
	0.305	0.695821
	0.306	0.694162
	0.307	0.69228
	0.308	0.690397
	0.309	0.688378
	0.31	0.686743
	0.311	0.686203
	0.312	0.683853
	0.313	0.68207
	0.314	0.680684
	0.315	0.678952
	0.316	0.677123
	0.317	0.6747
	0.318	0.672692
	0.319	0.670902
	0.32	0.669798
	0.321	0.668056
	0.322	0.664982
	0.323	0.662782
	0.324	0.659742
	0.325	0.6572
	0.326	0.65455
	0.327	0.65178
	0.328	0.649088
	0.329	0.64667
	0.33	0.644832
	0.331	0.643068
	0.332	0.640539
	0.333	0.637384
	0.334	0.634459
	0.335	0.632096
	0.336	0.629903
	0.337	0.627842
	0.338	0.625763
	0.339	0.623742
	0.34	0.621604
	0.341	0.619123
	0.342	0.616713
	0.343	0.614465
	0.344	0.612568
	0.345	0.610898
	0.347	0.608742
	0.348	0.606876
	0.349	0.605352
	0.35	0.603935
	0.351	0.602534
	0.352	0.602188
	0.353	0.601046
	0.354	0.599619
	0.355	0.597761
	0.356	0.595355
	0.357	0.593602
	0.358	0.59317
	0.359	0.592481
	0.36	0.591066
	0.361	0.588788
	0.362	0.587639
	0.363	0.585713
	0.364	0.583535
	0.365	0.581064
	0.366	0.579658
	0.367	0.579164
	0.368	0.5778
	0.369	0.577038
	0.37	0.574982
	0.371	0.574544
	0.372	0.573662
	0.373	0.572577
	0.374	0.572656
	0.375	0.571624
	0.376	0.569889
	0.377	0.568228
	0.378	0.566998
	0.379	0.566646
	0.38	0.566124
	0.381	0.564523
	0.382	0.562274
	0.383	0.56074
	0.384	0.559395
	0.385	0.558205
	0.386	0.557682
	0.387	0.557231
	0.388	0.555985
	0.389	0.554976
	0.39	0.554819
	0.392	0.554329
	0.393	0.553394
	0.394	0.552956
	0.395	0.552161
	0.396	0.550495
	0.397	0.549605
	0.398	0.549212
	0.399	0.54894
	0.4	0.548369
	0.401	0.547913
	0.402	0.54808
	0.403	0.547518
	0.404	0.547308
	0.405	0.547675
	0.406	0.54775
	0.407	0.547638
	0.408	0.545443
	0.409	0.545055
	0.41	0.544163
	0.411	0.542907
	0.412	0.542374
	0.413	0.541982
	0.414	0.542385
	0.415	0.543202
	0.416	0.542069
	0.417	0.541129
	0.418	0.540473
	0.419	0.539851
	0.42	0.540144
	0.421	0.539343
	0.422	0.539796
	0.423	0.540542
	0.424	0.540161
	0.425	0.539878
	0.426	0.54008
	0.427	0.539884
	0.428	0.540291
	0.429	0.539541
	0.43	0.538131
	0.431	0.537707
	0.432	0.537316
	0.433	0.536611
	0.434	0.535936
	0.435	0.535352
	0.436	0.534152
	0.438	0.533161
	0.439	0.533069
	0.44	0.532616
	0.441	0.531514
	0.442	0.530715
	0.443	0.530032
	0.444	0.529277
	0.445	0.529281
	0.446	0.529764
	0.447	0.528394
	0.448	0.52751
	0.449	0.526633
	0.45	0.52516
	0.451	0.524698
	0.452	0.522443
	0.453	0.521932
	0.454	0.520131
	0.455	0.518797
	0.456	0.518561
	0.457	0.518269
	0.458	0.517692
	0.459	0.516981
	0.46	0.516838
	0.461	0.51705
	0.462	0.516058
	0.463	0.515399
	0.464	0.514325
	0.465	0.513737
	0.466	0.513308
	0.467	0.512213
	0.468	0.511125
	0.469	0.5096
	0.47	0.50817
	0.471	0.506814
	0.472	0.504953
	0.473	0.503571
	0.474	0.502632
	0.475	0.501861
	0.476	0.500616
	0.477	0.500067
	0.478	0.499353
	0.479	0.498137
	0.48	0.497198
	0.481	0.496724
	0.483	0.496512
	0.484	0.496095
	0.485	0.495358
	0.486	0.494431
	0.487	0.493936
	0.488	0.49291
	0.489	0.491012
	0.49	0.489474
	0.491	0.48779
	0.492	0.486289
	0.493	0.48523
	0.494	0.482709
	0.495	0.480022
	0.496	0.478826
	0.497	0.47905
	0.498	0.477819
	0.499	0.476142
	0.5	0.475091
	0.501	0.473257
	0.502	0.471893
	0.503	0.470149
	0.504	0.469093
	0.505	0.468319
	0.506	0.466033
	0.507	0.46401
	0.508	0.462843
	0.509	0.461769
	0.51	0.459671
	0.511	0.458436
	0.512	0.457932
	0.513	0.45723
	0.514	0.455681
	0.515	0.453684
	0.516	0.452909
	0.517	0.45269
	0.518	0.451839
	0.519	0.45109
	0.52	0.450382
	0.521	0.449826
	0.522	0.448443
	0.523	0.446909
	0.524	0.445849
	0.525	0.445016
	0.526	0.444378
	0.528	0.443207
	0.529	0.441854
	0.53	0.441117
	0.531	0.440561
	0.532	0.439788
	0.533	0.438536
	0.534	0.437256
	0.535	0.436793
	0.536	0.436294
	0.537	0.435611
	0.538	0.434737
	0.539	0.433711
	0.54	0.433161
	0.541	0.433503
	0.542	0.433457
	0.543	0.43346
	0.544	0.434446
	0.545	0.43423
	0.546	0.432788
	0.547	0.431699
	0.548	0.431224
	0.549	0.429743
	0.55	0.430271
	0.551	0.4297
	0.552	0.428864
	0.553	0.428946
	0.554	0.428805
	0.555	0.427229
	0.556	0.426637
	0.557	0.426471
	0.558	0.426381
	0.559	0.42546
	0.56	0.425211
	0.561	0.423977
	0.562	0.422865
	0.563	0.422463
	0.564	0.422384
	0.565	0.421744
	0.566	0.420509
	0.567	0.419101
	0.568	0.418379
	0.569	0.417728
	0.57	0.41658
	0.571	0.415515
	0.573	0.415493
	0.574	0.415422
	0.575	0.414811
	0.576	0.41388
	0.577	0.412819
	0.578	0.412444
	0.579	0.412397
	0.58	0.412575
	0.581	0.411793
	0.582	0.411306
	0.583	0.411114
	0.584	0.410959
	0.585	0.410357
	0.586	0.410079
	0.587	0.409479
	0.588	0.409055
	0.589	0.408634
	0.59	0.407731
	0.591	0.407265
	0.592	0.406207
	0.593	0.404133
	0.594	0.404065
	0.595	0.403243
	0.596	0.402496
	0.597	0.401615
	0.598	0.401217
	0.599	0.401319
	0.6	0.399697
	0.601	0.398548
	0.602	0.398573
	0.603	0.397779
	0.604	0.396493
	0.605	0.396108
	0.606	0.395876
	0.607	0.394901
	0.608	0.39417
	0.609	0.393865
	0.61	0.39308
	0.611	0.392675
	0.612	0.391508
	0.613	0.390047
	0.614	0.389422
	0.615	0.388803
	0.616	0.38798
	0.618	0.387441
	0.619	0.386572
	0.62	0.385788
	0.621	0.385161
	0.622	0.384933
	0.623	0.384229
	0.624	0.382557
	0.625	0.381036
	0.626	0.379609
	0.627	0.379462
	0.628	0.378398
	0.629	0.378061
	0.63	0.376283
	0.631	0.375323
	0.632	0.374598
	0.633	0.373998
	0.634	0.372513
	0.635	0.371958
	0.636	0.371362
	0.637	0.370231
	0.638	0.36983
	0.639	0.369704
	0.64	0.369164
	0.641	0.368068
	0.642	0.368461
	0.643	0.368293
	0.644	0.367966
	0.645	0.367631
	0.646	0.367696
	0.647	0.367194
	0.648	0.366677
	0.649	0.365778
	0.65	0.365466
	0.651	0.365609
	0.652	0.364462
	0.653	0.363855
	0.654	0.363858
	0.655	0.364113
	0.656	0.364174
	0.657	0.364136
	0.658	0.363506
	0.659	0.36309
	0.66	0.362573
	0.661	0.361115
	0.662	0.360455
	0.664	0.360001
	0.665	0.359633
	0.666	0.358984
	0.667	0.358405
	0.668	0.357608
	0.669	0.356843
	0.67	0.356403
	0.671	0.35655
	0.672	0.355374
	0.673	0.35439
	0.674	0.354358
	0.675	0.354571
	0.676	0.355354
	0.677	0.354077
	0.678	0.353269
	0.679	0.351136
	0.68	0.350722
	0.681	0.351007
	0.682	0.349789
	0.683	0.348553
	0.684	0.349181
	0.685	0.348006
	0.686	0.347378
	0.687	0.346848
	0.688	0.345598
	0.689	0.344838
	0.69	0.344197
	0.691	0.343445
	0.692	0.342793
	0.693	0.342225
	0.694	0.340163
	0.695	0.339126
	0.696	0.337955
	0.697	0.337554
	0.698	0.336462
	0.699	0.335846
	0.7	0.335163
	0.701	0.334151
	0.702	0.333883
	0.703	0.333854
	0.704	0.33334
	0.705	0.331668
	0.706	0.330567
	0.707	0.330261
	0.709	0.330134
	0.71	0.329353
	0.711	0.328767
	0.712	0.32887
	0.713	0.328751
	0.714	0.328137
	0.715	0.327634
	0.716	0.327588
	0.717	0.326885
	0.718	0.32659
	0.719	0.32634
	0.72	0.326107
	0.721	0.325167
	0.722	0.324846
	0.723	0.324986
	0.724	0.324222
	0.725	0.322725
	0.726	0.322784
	0.727	0.322344
	0.728	0.321595
	0.729	0.321954
	0.73	0.321986
	0.731	0.321667
	0.732	0.321737
	0.733	0.321265
	0.734	0.320191
	0.735	0.319992
	0.736	0.318891
	0.737	0.318735
	0.738	0.319093
	0.739	0.318821
	0.74	0.318479
	0.741	0.317455
	0.742	0.3164
	0.743	0.315859
	0.744	0.315989
	0.745	0.316285
	0.746	0.315657
	0.747	0.314816
	0.748	0.314706
	0.749	0.313776
	0.75	0.312931
	0.751	0.312526
	0.752	0.312026
	0.754	0.310522
	0.755	0.309624
	0.756	0.309982
	0.757	0.309603
	0.758	0.30879
	0.759	0.307776
	0.76	0.306946
	0.761	0.306957
	0.762	0.306308
	0.763	0.305819
	0.764	0.304914
	0.765	0.303708
	0.766	0.302974
	0.767	0.302252
	0.768	0.301525
	0.769	0.301646
	0.77	0.300629
	0.771	0.30076
	0.772	0.301209
	0.773	0.300213
	0.774	0.299524
	0.775	0.299922
	0.776	0.299134
	0.777	0.299209
	0.778	0.299697
	0.779	0.299091
	0.78	0.297869
	0.781	0.296635
	0.782	0.295828
	0.783	0.295867
	0.784	0.295391
	0.785	0.294585
	0.786	0.293989
	0.787	0.293481
	0.788	0.292904
	0.789	0.292091
	0.79	0.292009
	0.791	0.292504
	0.792	0.292355
	0.793	0.291958
	0.794	0.290714
	0.795	0.288663
	0.796	0.28763
	0.797	0.286828
	0.799	0.2867
	0.8	0.28671
	0.801	0.28659
	0.802	0.286564
	0.803	0.286325
	0.804	0.286852
	0.805	0.286572
	0.806	0.285296
	0.807	0.284364
	0.808	0.283513
	0.809	0.282614
	0.81	0.281938
	0.811	0.281608
	0.812	0.281237
	0.813	0.280133
	0.814	0.279633
	0.815	0.279312
	0.816	0.278917
	0.817	0.279015
	0.818	0.278882
	0.819	0.278334
	0.82	0.277948
	0.821	0.276533
	0.822	0.275482
	0.823	0.275946
	0.824	0.276394
	0.825	0.27558
	0.826	0.27487
	0.827	0.274433
	0.828	0.273831
	0.829	0.272779
	0.83	0.272186
	0.831	0.271541
	0.832	0.270376
	0.833	0.269338
	0.834	0.268829
	0.835	0.268336
	0.836	0.268139
	0.837	0.267979
	0.838	0.267632
	0.839	0.266984
	0.84	0.265636
	0.841	0.264245
	0.842	0.263546
	0.844	0.263634
	0.845	0.264679
	0.846	0.264753
	0.847	0.26489
	0.848	0.26481
	0.849	0.263658
	0.85	0.26258
	0.851	0.261608
	0.852	0.260848
	0.853	0.259342
	0.854	0.258168
	0.855	0.257736
	0.856	0.257944
	0.857	0.258242
	0.858	0.257602
	0.859	0.257763
	0.86	0.257585
	0.861	0.256173
	0.862	0.255699
	0.863	0.25568
	0.864	0.255881
	0.865	0.255922
	0.866	0.255637
	0.867	0.254546
	0.868	0.253464
	0.869	0.252519
	0.87	0.252424
	0.871	0.251773
	0.872	0.251678
	0.873	0.250611
	0.874	0.249203
	0.875	0.248528
	0.876	0.247864
	0.877	0.247068
	0.878	0.246462
	0.879	0.246236
	0.88	0.245088
	0.881	0.244124
	0.882	0.24414
	0.883	0.2443
	0.884	0.244214
	0.885	0.244295
	0.886	0.243638
	0.887	0.242367
	0.888	0.241721
	0.89	0.241837
	0.891	0.242386
	0.892	0.242274
	0.893	0.241991
	0.894	0.241275
	0.895	0.240662
	0.896	0.241305
	0.897	0.240437
	0.898	0.240297
	0.899	0.240359
	0.9	0.240685
	0.901	0.240551
	0.902	0.240054
	0.903	0.240272
	0.904	0.239197
	0.905	0.238108
	0.906	0.237005
	0.907	0.23562
	0.908	0.236209
	0.909	0.235016
	0.91	0.234691
	0.911	0.234452
	0.912	0.233219
	0.913	0.232351
	0.914	0.23137
	0.915	0.230574
	0.916	0.230231
	0.917	0.229772
	0.918	0.230367
	0.919	0.230313
	0.92	0.230181
	0.921	0.229585
	0.922	0.228521
	0.923	0.227515
	0.924	0.226701
	0.925	0.226426
	0.926	0.226189
	0.927	0.225397
	0.928	0.224586
	0.929	0.224539
	0.93	0.22512
	0.931	0.225827
	0.932	0.226077
	0.933	0.226358
	0.935	0.226221
	0.936	0.225955
	0.937	0.226239
	0.938	0.227158
	0.939	0.22696
	0.94	0.226096
	0.941	0.225447
	0.942	0.225425
	0.943	0.22483
	0.944	0.225205
	0.945	0.225186
	0.946	0.224252
	0.947	0.224172
	0.948	0.223785
	0.949	0.223352
	0.95	0.222635
	0.951	0.222949
	0.952	0.223257
	0.953	0.222935
	0.954	0.223407
	0.955	0.223944
	0.956	0.223678
	0.957	0.223
	0.958	0.22263
	0.959	0.222713
	0.96	0.22269
	0.961	0.223553
	0.962	0.224337
	0.963	0.224222
	0.964	0.223965
	0.965	0.223435
	0.966	0.223448
	0.967	0.224692
	0.968	0.224589
	0.969	0.224852
	0.97	0.224636
	0.971	0.224245
	0.972	0.224477
	0.973	0.225239
	0.974	0.225874
	0.975	0.225863
	0.976	0.226157
	0.977	0.226632
	0.978	0.22693
	0.98	0.22699
	0.981	0.226743
	0.982	0.226284
	0.983	0.225727
	0.984	0.225335
	0.985	0.2249
	0.986	0.224271
	0.987	0.224192
	0.988	0.223002
	0.989	0.222334
	0.99	0.221001
	0.991	0.220137
	0.992	0.219494
	0.993	0.219072
	0.994	0.217519
	0.995	0.216851
	0.996	0.217653
	0.997	0.217674
	0.998	0.216846
	0.999	0.21602
	1	0.215696
	1.001	0.214339
	1.002	0.213892
	1.003	0.214228
	1.004	0.214008
	1.005	0.213466
	1.006	0.213049
	1.007	0.21325
	1.008	0.211751
	1.009	0.210881
	1.01	0.209932
	1.011	0.209508
	1.012	0.209506
	1.013	0.20938
	1.014	0.209139
	1.015	0.209583
	1.016	0.209028
	1.017	0.207394
	1.018	0.206595
	1.019	0.205893
	1.02	0.205183
	1.021	0.20498
	1.022	0.205177
	1.023	0.205335
	1.025	0.205236
	1.026	0.204677
	1.027	0.204074
	1.028	0.203553
	1.029	0.20213
	1.03	0.201115
	1.031	0.20126
	1.032	0.201458
	1.033	0.201264
	1.034	0.199796
	1.035	0.199522
	1.036	0.198918
	1.037	0.197642
	1.038	0.196834
	1.039	0.197464
	1.04	0.198806
	1.041	0.198369
	1.042	0.197661
	1.043	0.197178
	1.044	0.196225
	1.045	0.195983
	1.046	0.194901
	1.047	0.194003
	1.048	0.194397
	1.049	0.194551
	1.05	0.194074
	1.051	0.194457
	1.052	0.193945
	1.053	0.192967
	1.054	0.192429
	1.055	0.1921
	1.056	0.191582
	1.057	0.191058
	1.058	0.191187
	1.059	0.191371
	1.06	0.19077
	1.061	0.189367
	1.062	0.188759
	1.063	0.188463
	1.064	0.187775
	1.065	0.186612
	1.066	0.186412
	1.067	0.186728
	1.068	0.186023
	1.069	0.185172
	1.071	0.185501
	1.072	0.185364
	1.073	0.184049
	1.074	0.182849
	1.075	0.181514
	1.076	0.180671
	1.077	0.179587
	1.078	0.179219
	1.079	0.17943
	1.08	0.178933
	1.081	0.177818
	1.082	0.175745
	1.083	0.173804
	1.084	0.173319
	1.085	0.17261
	1.086	0.172063
	1.087	0.171892
	1.088	0.171814
	1.089	0.171765
	1.09	0.170736
	1.091	0.170529
	1.092	0.170577
	1.093	0.169723
	1.094	0.169798
	1.095	0.169231
	1.096	0.16819
	1.097	0.167687
	1.098	0.166851
	1.099	0.166262
	1.1	0.166364
	1.101	0.165738
	1.102	0.164688
	1.103	0.163924
	1.104	0.163625
	1.105	0.163132
	1.106	0.162568
	1.107	0.162455
	1.108	0.161697
	1.109	0.161191
	1.11	0.161442
	1.111	0.161504
	1.112	0.161123
	1.113	0.160217
	1.114	0.15925
	1.116	0.158413
	1.117	0.15723
	1.118	0.155877
	1.119	0.155303
	1.12	0.154556
	1.121	0.153583
	1.122	0.153191
	1.123	0.152305
	1.124	0.151503
	1.125	0.151823
	1.126	0.151641
	1.127	0.151425
	1.128	0.151534
	1.129	0.150904
	1.13	0.150771
	1.131	0.149948
	1.132	0.150163
	1.133	0.150938
	1.134	0.150911
	1.135	0.149541
	1.136	0.149625
	1.137	0.149443
	1.138	0.148331
	1.139	0.147028
	1.14	0.14665
	1.141	0.145347
	1.142	0.145195
	1.143	0.144945
	1.144	0.144974
	1.145	0.144532
	1.146	0.144452
	1.147	0.143619
	1.148	0.143539
	1.149	0.143509
	1.15	0.142218
	1.151	0.141162
	1.152	0.141397
	1.153	0.141591
	1.154	0.140492
	1.155	0.139984
	1.156	0.139655
	1.157	0.138847
	1.158	0.138692
	1.159	0.137856
	1.161	0.137468
	1.162	0.136428
	1.163	0.136339
	1.164	0.136783
	1.165	0.13702
	1.166	0.137378
	1.167	0.137845
	1.168	0.138486
	1.169	0.138367
	1.17	0.138398
	1.171	0.137264
	1.172	0.136713
	1.173	0.136489
	1.174	0.136152
	1.175	0.135086
	1.176	0.134712
	1.177	0.134394
	1.178	0.133146
	1.179	0.132897
	1.18	0.132406
	1.181	0.132159
	1.182	0.131517
	1.183	0.130353
	1.184	0.129848
	1.185	0.129846
	1.186	0.129548
	1.187	0.129213
	1.188	0.12968
	1.189	0.129721
	1.19	0.129985
	1.191	0.130485
	1.192	0.130333
	1.193	0.130182
	1.194	0.129889
	1.195	0.12961
	1.196	0.129428
	1.197	0.129799
	1.198	0.12921
	1.199	0.128704
	1.2	0.128762
	1.201	0.128812
	1.202	0.128105
	1.203	0.127394
	1.204	0.12746
	1.206	0.126859
	1.207	0.126616
	1.208	0.126676
	1.209	0.12582
	1.21	0.125522
	1.211	0.125002
	1.212	0.125193
	1.213	0.125061
	1.214	0.125398
	1.215	0.125749
	1.216	0.125971
	1.217	0.125199
	1.218	0.124559
	1.219	0.123726
	1.22	0.123914
	1.221	0.12515
	1.222	0.125826
	1.223	0.12652
	1.224	0.12659
	1.225	0.126534
	1.226	0.125641
	1.227	0.126198
	1.228	0.125562
	1.229	0.125678
	1.23	0.125082
	1.231	0.124946
	1.232	0.12534
	1.233	0.126299
	1.234	0.126444
	1.235	0.126935
	1.236	0.126448
	1.237	0.126063
	1.238	0.125646
	1.239	0.124672
	1.24	0.123977
	1.241	0.123307
	1.242	0.123201
	1.243	0.123312
	1.244	0.122477
	1.245	0.121706
	1.246	0.121346
	1.247	0.12048
	1.248	0.119818
	1.249	0.119408
	1.251	0.11922
	1.252	0.118817
	1.253	0.118466
	1.254	0.117936
	1.255	0.117503
	1.256	0.118075
	1.257	0.118404
	1.258	0.118414
	1.259	0.119032
	1.26	0.118349
	1.261	0.11763
	1.262	0.117401
	1.263	0.116026
	1.264	0.114664
	1.265	0.113839
	1.266	0.112346
	1.267	0.111552
	1.268	0.111014
	1.269	0.111472
	1.27	0.110454
	1.271	0.109582
	1.272	0.108206
	1.273	0.107497
	1.274	0.107173
	1.275	0.107098
	1.276	0.107623
	1.277	0.106523
	1.278	0.106301
	1.279	0.106153
	1.28	0.106155
	1.281	0.105441
	1.282	0.104122
	1.283	0.103254
	1.284	0.102571
	1.285	0.101662
	1.286	0.10116
	1.287	0.100744
	1.288	0.100258
	1.289	0.100652
	1.29	0.100559
	1.291	0.100233
	1.292	0.0990031
	1.293	0.0971916
	1.294	0.0966782
	1.295	0.0962158
	1.297	0.0958729
	1.298	0.0960492
	1.299	0.095649
	1.3	0.0956506
	1.301	0.0953097
	1.302	0.0949582
	1.303	0.0946363
	1.304	0.0949687
	1.305	0.0951744
	1.306	0.0943746
	1.307	0.0935613
	1.308	0.0931398
	1.309	0.0927858
	1.31	0.0929111
	1.311	0.0930012
	1.312	0.0927219
	1.313	0.0920091
	1.314	0.092612
	1.315	0.0930804
	1.316	0.0927895
	1.317	0.09287
	1.318	0.0918456
	1.319	0.0913289
	1.32	0.0916387
	1.321	0.0907012
	1.322	0.0902936
	1.323	0.0898509
	1.324	0.0891418
	1.325	0.0881333
	1.326	0.0873457
	1.327	0.0876233
	1.328	0.0878202
	1.329	0.0874654
	1.33	0.0871974
	1.331	0.0877076
	1.332	0.0886096
	1.333	0.088326
	1.334	0.0873827
	1.335	0.0876257
	1.336	0.0880422
	1.337	0.0877452
	1.338	0.0869528
	1.339	0.0858245
	1.34	0.0851917
	1.342	0.0849467
	1.343	0.0860495
	1.344	0.0867532
	1.345	0.0859277
	1.346	0.0856626
	1.347	0.0854212
	1.348	0.0854437
	1.349	0.0855911
	1.35	0.084835
	1.351	0.0853784
	1.352	0.0850606
	1.353	0.0848063
	1.354	0.084363
	1.355	0.0836092
	1.356	0.0838916
	1.357	0.0834322
	1.358	0.082833
	1.359	0.0817004
	1.36	0.0815053
	1.361	0.0816502
	1.362	0.0814311
	1.363	0.0816861
	1.364	0.0801268
	1.365	0.0793056
	1.366	0.0788556
	1.367	0.0788855
	1.368	0.0791173
	1.369	0.0779218
	1.37	0.0771036
	1.371	0.0773933
	1.372	0.0780837
	1.373	0.0788028
	1.374	0.0787254
	1.375	0.0780723
	1.376	0.07748
	1.377	0.0769251
	1.378	0.0767787
	1.379	0.0772048
	1.38	0.0774044
	1.381	0.0767612
	1.382	0.0760765
	1.383	0.0761641
	1.384	0.0765715
	1.385	0.0760385
	1.387	0.0751725
	1.388	0.0752942
	1.389	0.0759864
	1.39	0.0767517
	1.391	0.0776024
	1.392	0.0778377
	1.393	0.077474
	1.394	0.0779377
	1.395	0.0784591
	1.396	0.0785989
	1.397	0.0784486
	1.398	0.0777997
	1.399	0.0772728
	1.4	0.0777331
	1.401	0.0764793
	1.402	0.0761896
	1.403	0.0755351
	1.404	0.0754541
	1.405	0.0755574
	1.406	0.0751506
	1.407	0.074845
	1.408	0.0751417
	1.409	0.075986
	1.41	0.0757546
	1.411	0.0745363
	1.412	0.0737969
	1.413	0.0733939
	1.414	0.0735852
	1.415	0.0730085
	1.416	0.0729425
	1.417	0.0730652
	1.418	0.0733486
	1.419	0.073828
	1.42	0.074047
	1.421	0.0738689
	1.422	0.0726798
	1.423	0.0716703
	1.424	0.0716845
	1.425	0.071935
	1.426	0.0719949
	1.427	0.0720976
	1.428	0.0713851
	1.429	0.0702933
	1.43	0.0693334
	1.432	0.0688613
	1.433	0.0682951
	1.434	0.068024
	1.435	0.0674526
	1.436	0.0667908
	1.437	0.0664571
	1.438	0.0660061
	1.439	0.0647096
	1.44	0.0639247
	1.441	0.06255
	1.442	0.0616863
	1.443	0.0608718
	1.444	0.0604793
	1.445	0.0600486
	1.446	0.059723
	1.447	0.0583063
	1.448	0.057987
	1.449	0.0579839
	1.45	0.0570821
	1.451	0.0568352
	1.452	0.0577549
	1.453	0.0580013
	1.454	0.0567361
	1.455	0.0558066
	1.456	0.0552547
	1.457	0.0542239
	1.458	0.0532992
	1.459	0.0523191
	1.46	0.0521335
	1.461	0.0523404
	1.462	0.0520456
	1.463	0.0519529
	1.464	0.051596
	1.465	0.0510979
	1.466	0.0506483
	1.467	0.0499353
	1.468	0.0489772
	1.469	0.0481985
	1.47	0.0474986
	1.471	0.0468405
	1.472	0.0465822
	1.473	0.0464287
	1.474	0.0466
	1.475	0.0469202
	1.476	0.0461259
	1.478	0.0449078
	1.479	0.0441049
	1.48	0.0438564
	1.481	0.0442099
	1.482	0.0439071
	1.483	0.0439877
	1.484	0.0441572
	1.485	0.0441046
	1.486	0.0434206
	1.487	0.0433877
	1.488	0.0427345
	1.489	0.0432625
	1.49	0.0430422
	1.491	0.042945
	1.492	0.0424583
	1.493	0.0420982
	1.494	0.0412882
	1.495	0.0409095
	1.496	0.0398546
	1.497	0.0400991
	1.498	0.0396092
	1.499	0.0391815
	1.5	0.0391181
	1.501	0.0390943
	1.502	0.0383101
	1.503	0.0382464
	1.504	0.0390384
	1.505	0.0392944
	1.506	0.0395237
	1.507	0.039388
	1.508	0.0385987
	1.509	0.0386771
	1.51	0.0382691
	1.511	0.0374358
	1.512	0.0376037
	1.513	0.0378002
	1.514	0.0378373
	1.515	0.0380408
	1.516	0.0378568
	1.517	0.0378472
	1.518	0.0382755
	1.519	0.0386354
	1.52	0.0393098
	1.521	0.0397855
	1.523	0.0403405
	1.524	0.0404577
	1.525	0.0401619
	1.526	0.0399786
	1.527	0.0402453
	1.528	0.040572
	1.529	0.0414788
	1.53	0.0411847
	1.531	0.041226
	1.532	0.0407132
	1.533	0.0399221
	1.534	0.038866
	1.535	0.0397168
	1.536	0.0400323
	1.537	0.0399539
	1.538	0.0399294
	1.539	0.0391184
	1.54	0.0385334
	1.541	0.0389977
	1.542	0.0395443
	1.543	0.0388433
	1.544	0.0384062
	1.545	0.0375124
	1.546	0.039077
	1.547	0.0396054
	1.548	0.0400949
	1.549	0.0404048
	1.55	0.0404991
	1.551	0.0409024
	1.552	0.0407674
	1.553	0.0406589
	1.554	0.040674
	1.555	0.0404483
	1.556	0.0398838
	1.557	0.0409048
	1.558	0.0417723
	1.559	0.0418482
	1.56	0.042723
	1.561	0.0434213
	1.562	0.0433066
	1.563	0.0433281
	1.564	0.0437823
	1.565	0.0434152
	1.566	0.0434568
	1.568	0.043212
	1.569	0.0425422
	1.57	0.0418055
	1.571	0.0408198
	1.572	0.0392846
	1.573	0.0379828
	1.574	0.0369861
	1.575	0.036494
	1.576	0.0353115
	1.577	0.0344678
	1.578	0.0342151
	1.579	0.0332106
	1.58	0.0333877
	1.581	0.0333219
	1.582	0.0332838
	1.583	0.0337826
	1.584	0.0335854
	1.585	0.032616
	1.586	0.0325471
	1.587	0.0318645
	1.588	0.0310199
	1.589	0.0305204
	1.59	0.0301454
	1.591	0.029208
	1.592	0.0283813
	1.593	0.028339
	1.594	0.0285677
	1.595	0.0297153
	1.596	0.02964
	1.597	0.0288742
	1.598	0.0281717
	1.599	0.0276535
	1.6	0.0272679
	1.601	0.0263827
	1.602	0.0252127
	1.603	0.0244356
	1.604	0.0235294
	1.605	0.0236277
	1.606	0.0237454
	1.607	0.0234576
	1.608	0.0233216
	1.609	0.0229004
	1.61	0.0222568
	1.611	0.0217122
	1.613	0.0211173
	1.614	0.020123
	1.615	0.0194479
	1.616	0.0195717
	1.617	0.0191368
	1.618	0.0185625
	1.619	0.0188168
	1.62	0.0188957
	1.621	0.0186364
	1.622	0.0192794
	1.623	0.0193838
	1.624	0.0199139
	1.625	0.0203108
	1.626	0.0216139
	1.627	0.0224873
	1.628	0.0224506
	1.629	0.022576
	1.63	0.0223318
	1.631	0.0224825
	1.632	0.0229594
	1.633	0.0227666
	1.634	0.0222678
	1.635	0.0222796
	1.636	0.0231843
	1.637	0.0235166
	1.638	0.0246497
	1.639	0.0250588
	1.64	0.0253917
	1.641	0.0257064
	1.642	0.0260283
	1.643	0.026367
	1.644	0.02644
	1.645	0.0260669
	1.646	0.0254956
	1.647	0.0254733
	1.648	0.0254902
	1.649	0.0251827
	1.65	0.0245459
	1.651	0.0244945
	1.652	0.0247211
	1.653	0.0247791
	1.654	0.0247623
	1.655	0.0242746
	1.656	0.0243004
	1.658	0.0246251
	1.659	0.0249739
	1.66	0.0247458
	1.661	0.0251574
	1.662	0.0250502
	1.663	0.0250253
	1.664	0.0246606
	1.665	0.0240326
	1.666	0.0244131
	1.667	0.0245201
	1.668	0.0245886
	1.669	0.0240189
	1.67	0.0243212
	1.671	0.0243934
	1.672	0.0251818
	1.673	0.0256669
	1.674	0.0259571
	1.675	0.0257674
	1.676	0.0252435
	1.677	0.0248002
	1.678	0.0244091
	1.679	0.024992
	1.68	0.0250169
	1.681	0.0243577
	1.682	0.0244099
	1.683	0.024948
	1.684	0.0254601
	1.685	0.0244484
	1.686	0.022789
	1.687	0.0216501
	1.688	0.0204245
	1.689	0.020401
	1.69	0.0204418
	1.691	0.0200016
	1.692	0.0197244
	1.693	0.0198449
	1.694	0.0199408
	1.695	0.0196163
	1.696	0.0188495
	1.697	0.0182915
	1.698	0.0180441
	1.699	0.0180177
	1.7	0.0183006
	1.701	0.0187136
	1.702	0.0191719
	1.704	0.0197898
	1.705	0.0199956
	1.706	0.0200893
	1.707	0.0200622
	1.708	0.0197478
	1.709	0.0199384
	1.71	0.0204124
	1.711	0.019683
	1.712	0.0200249
	1.713	0.0200482
	1.714	0.0204516
	1.715	0.0199048
	1.716	0.0189271
	1.717	0.0179323
	1.718	0.0177275
	1.719	0.0185476
	1.72	0.0175289
	1.721	0.0166262
	1.722	0.0163143
	1.723	0.0157925
	1.724	0.015117
	1.725	0.0146141
	1.726	0.013569
	1.727	0.0134468
	1.728	0.0131338
	1.729	0.012716
	1.73	0.0118495
	1.731	0.0114204
	1.732	0.0109728
	1.733	0.0104538
	1.734	0.00984714
	1.735	0.0102543
	1.736	0.0103619
	1.737	0.00988878
	1.738	0.0097343
	1.739	0.00918013
	1.74	0.00838767
	1.741	0.00801533
	1.742	0.00783094
	1.743	0.00742971
	1.744	0.00695643
	1.745	0.00647755
	1.746	0.00725901
	1.747	0.0079031
	1.749	0.007799
	1.75	0.00731465
	1.751	0.00707676
	1.752	0.0072762
	1.753	0.00696188
	1.754	0.00621743
	1.755	0.00563984
	1.756	0.0051439
	1.757	0.0049686
	1.758	0.00418633
	1.759	0.00323092
	1.76	0.0023782
	1.761	0.00164115
	1.762	0.00090199
	1.763	0.00076002
	1.764	0.00029236
	1.765	0.00140375
	1.766	0.00094623
	1.767	0.00183772
	1.768	0.00155894
	1.769	0.00081465
	1.77	3.09e-05
	1.771	0.00032046
	1.772	-0.0006306
	1.773	-0.0011418
	1.774	-0.0019127
	1.775	-0.0017499
	1.776	-0.0015543
	1.777	-0.0019898
	1.778	-0.001865
	1.779	-0.0021688
	1.78	-0.0020308
	1.781	-0.0020778
	1.782	-0.0027341
	1.783	-0.0035702
	1.784	-0.0034334
	1.785	-0.0036965
	1.786	-0.003602
	1.787	-0.0025546
	1.788	-0.0014068
	1.789	-0.0012817
	1.79	-0.0011026
	1.791	-0.0009605
	1.792	-0.0011537
	1.794	-0.0015974
	1.795	-0.0023865
	1.796	-0.0026418
	1.797	-0.0032864
	1.798	-0.0041699
	1.799	-0.0042169
	1.8	-0.0043217
	1.801	-0.0047437
	1.802	-0.0057086
	1.803	-0.0060257
	1.804	-0.006112
	1.805	-0.0052871
	1.806	-0.0057649
	1.807	-0.0067111
	1.808	-0.0070187
	1.809	-0.0071839
	1.81	-0.0074187
	1.811	-0.0068819
	1.812	-0.0063506
	1.813	-0.0066075
	1.814	-0.0069517
	1.815	-0.0078202
	1.816	-0.0073672
	1.817	-0.0069723
	1.818	-0.0071801
	1.819	-0.006594
	1.82	-0.0060218
	1.821	-0.0066219
	1.822	-0.0064844
	1.823	-0.0063658
	1.824	-0.0066083
	1.825	-0.0072406
	1.826	-0.0072181
	1.827	-0.0069497
	1.828	-0.0073641
	1.829	-0.0076071
	1.83	-0.0073663
	1.831	-0.0072662
	1.832	-0.0072276
	1.833	-0.0075745
	1.834	-0.0079795
	1.835	-0.0079242
	1.836	-0.0078253
	1.837	-0.0082792
	1.839	-0.0088628
	1.84	-0.0082102
	1.841	-0.0082726
	1.842	-0.008573
	1.843	-0.0084346
	1.844	-0.0089132
	1.845	-0.0087395
	1.846	-0.0079791
	1.847	-0.0082744
	1.848	-0.0084301
	1.849	-0.0088347
	1.85	-0.0091924
	1.851	-0.0082039
	1.852	-0.0077206
	1.853	-0.0075633
	1.854	-0.0075452
	1.855	-0.0071171
	1.856	-0.0071515
	1.857	-0.0067232
	1.858	-0.0073551
	1.859	-0.0079903
	1.86	-0.0084105
	1.861	-0.0090933
	1.862	-0.0096966
	1.863	-0.0098596
	1.864	-0.0091591
	1.865	-0.0095144
	1.866	-0.0097576
	1.867	-0.0116216
	1.868	-0.0122052
	1.869	-0.0133185
	1.87	-0.0136583
	1.871	-0.0137057
	1.872	-0.0141242
	1.873	-0.0148438
	1.874	-0.0150945
	1.875	-0.0149758
	1.876	-0.0150284
	1.877	-0.0151811
	1.878	-0.015349
	1.879	-0.015716
	1.88	-0.0164134
	1.881	-0.0165022
	1.882	-0.0163403
	1.884	-0.0161812
	1.885	-0.0156347
	1.886	-0.0156247
	1.887	-0.0159928
	1.888	-0.0163028
	1.889	-0.0167913
	1.89	-0.0176777
	1.891	-0.0179342
	1.892	-0.0178986
	1.893	-0.0184256
	1.894	-0.0179872
	1.895	-0.0188296
	1.896	-0.0194553
	1.897	-0.0191993
	1.898	-0.0190351
	1.899	-0.0181585
	1.9	-0.0177428
	1.901	-0.0192213
	1.902	-0.0191598
	1.903	-0.0196724
	1.904	-0.0205125
	1.905	-0.0212549
	1.906	-0.0212396
	1.907	-0.022177
	1.908	-0.022378
	1.909	-0.0220738
	1.91	-0.0214771
	1.911	-0.0215096
	1.912	-0.022128
	1.913	-0.0225395
	1.914	-0.0231923
	1.915	-0.0231104
	1.916	-0.0231911
	1.917	-0.0227695
	1.918	-0.0230638
	1.919	-0.0232402
	1.92	-0.0233961
	1.921	-0.0235183
	1.922	-0.0233044
	1.923	-0.0226243
	1.924	-0.0221286
	1.925	-0.0224544
	1.926	-0.0232503
	1.927	-0.023916
	1.928	-0.0240834
	1.93	-0.0240565
	1.931	-0.0240285
	1.932	-0.024896
	1.933	-0.0251969
	1.934	-0.0247828
	1.935	-0.0254864
	1.936	-0.0252083
	1.937	-0.0253297
	1.938	-0.0253215
	1.939	-0.025943
	1.94	-0.0268601
	1.941	-0.0266159
	1.942	-0.0270248
	1.943	-0.0272705
	1.944	-0.0277659
	1.945	-0.0272606
	1.946	-0.0274195
	1.947	-0.0280311
	1.948	-0.0287023
	1.949	-0.0299406
	1.95	-0.0302235
	1.951	-0.0306576
	1.952	-0.031947
	1.953	-0.0323001
	1.954	-0.0323647
	1.955	-0.0327854
	1.956	-0.0332707
	1.957	-0.032859
	1.958	-0.0327447
	1.959	-0.033296
	1.96	-0.033883
	1.961	-0.0344439
	1.962	-0.0341884
	1.963	-0.0339395
	1.964	-0.0341349
	1.965	-0.0343828
	1.966	-0.0346011
	1.967	-0.0349036
	1.968	-0.0353618
	1.969	-0.0356543
	1.97	-0.0353216
	1.971	-0.0351403
	1.972	-0.0351876
	1.973	-0.0359316
	1.975	-0.0366352
	1.976	-0.0367339
	1.977	-0.0357858
	1.978	-0.0352799
	1.979	-0.0354873
	1.98	-0.0361909
	1.981	-0.0364499
	1.982	-0.0362342
	1.983	-0.0363739
	1.984	-0.0367963
	1.985	-0.0367454
	1.986	-0.0373395
	1.987	-0.0375448
	1.988	-0.0374013
	1.989	-0.036975
	1.99	-0.0371259
	1.991	-0.0383827
	1.992	-0.0383015
	1.993	-0.0388481
	1.994	-0.0393689
	1.995	-0.0403708
	1.996	-0.0399839
	1.997	-0.039557
	1.998	-0.03978
	1.999	-0.0401314
	2	-0.0405429
	2.001	-0.0400912
	2.002	-0.0399777
	2.003	-0.0395683
	2.004	-0.0397142
	2.005	-0.0399832
	2.006	-0.0396931
	2.007	-0.0395291
	2.008	-0.0392915
	2.009	-0.0396874
	2.01	-0.0400678
	2.011	-0.0399548
	2.012	-0.0407118
	2.013	-0.0407492
	2.014	-0.039633
	2.015	-0.039278
	2.016	-0.0394882
	2.017	-0.0394008
	2.018	-0.0392209
	2.02	-0.0393067
	2.021	-0.0393205
	2.022	-0.0398243
	2.023	-0.0399816
	2.024	-0.0400933
	2.025	-0.040813
	2.026	-0.0412215
	2.027	-0.0413776
	2.028	-0.042357
	2.029	-0.0421906
	2.03	-0.041516
	2.031	-0.0416166
	2.032	-0.0407862
	2.033	-0.0412299
	2.034	-0.0412696
	2.035	-0.041871
	2.036	-0.0423535
	2.037	-0.0426919
	2.038	-0.0423025
	2.039	-0.04211
	2.04	-0.0415434
	2.041	-0.040995
	2.042	-0.0405512
	2.043	-0.0400652
	2.044	-0.0403727
[truncated: 20,944 more rows]

## Sheet: Supplementary Fig 2a
	Elution volume (ml)	mAU
	0.001	0.0203563
	0.002	0.0218105
	0.003	0.0227476
	0.004	0.0239506
	0.005	0.0247447
	0.006	0.0249015
	0.007	0.0259536
	0.008	0.0271252
	0.009	0.0278442
	0.01	0.028254
	0.011	0.0284208
	0.012	0.0290337
	0.013	0.0301549
	0.014	0.0313391
	0.015	0.0319708
	0.016	0.0322147
	0.017	0.0318677
	0.018	0.0324868
	0.019	0.0342494
	0.02	0.0347988
	0.021	0.0341008
	0.022	0.0336227
	0.023	0.0336552
	0.024	0.0332828
	0.025	0.0331328
	0.026	0.034172
	0.027	0.0342171
	0.028	0.033384
	0.029	0.0331671
	0.03	0.0332299
	0.031	0.0331233
	0.032	0.032998
	0.033	0.0325368
	0.034	0.0319992
	0.035	0.0314138
	0.036	0.0307228
	0.037	0.0298356
	0.038	0.0292492
	0.039	0.0293194
	0.04	0.028691
	0.041	0.0276385
	0.042	0.026175
	0.043	0.0252807
	0.044	0.0254996
	0.045	0.0247943
	0.046	0.0232632
	0.047	0.0222673
	0.048	0.0214027
	0.049	0.0209825
	0.05	0.0206068
	0.051	0.0198588
	0.051	0.0181678
	0.052	0.0169524
	0.053	0.0164149
	0.054	0.0165162
	0.055	0.0183675
	0.056	0.0211926
	0.057	0.0314512
	0.058	0.0540622
	0.059	0.0834253
	0.06	0.113294
	0.061	0.143779
	0.062	0.180905
	0.063	0.228176
	0.064	0.285032
	0.065	0.343601
	0.066	0.399022
	0.067	0.451349
	0.068	0.500011
	0.069	0.546623
	0.07	0.593396
	0.071	0.639678
	0.072	0.682974
	0.073	0.725135
	0.074	0.767858
	0.075	0.808467
	0.076	0.844726
	0.077	0.880139
	0.078	0.915495
	0.079	0.950902
	0.08	0.986619
	0.081	1.01979
	0.082	1.05206
	0.083	1.08442
	0.084	1.11621
	0.085	1.14847
	0.086	1.17961
	0.087	1.20749
	0.088	1.23462
	0.089	1.26192
	0.09	1.28832
	0.091	1.31333
	0.092	1.33664
	0.093	1.35804
	0.094	1.37883
	0.095	1.40005
	0.096	1.42248
	0.097	1.44586
	0.098	1.46789
	0.099	1.49073
	0.1	1.5144
	0.101	1.53741
	0.102	1.55976
	0.103	1.58093
	0.104	1.6015
	0.105	1.62069
	0.106	1.63958
	0.107	1.65023
	0.108	1.64887
	0.109	1.64035
	0.11	1.63295
	0.111	1.62507
	0.112	1.60809
	0.113	1.58113
	0.114	1.54264
	0.115	1.49896
	0.116	1.45975
	0.117	1.42275
	0.118	1.38848
	0.119	1.35732
	0.12	1.32697
	0.121	1.2975
	0.122	1.26958
	0.123	1.24344
	0.124	1.21832
	0.125	1.19443
	0.126	1.17678
	0.127	1.1637
	0.128	1.15282
	0.129	1.14392
	0.13	1.13715
	0.131	1.13435
	0.132	1.13488
	0.133	1.13628
	0.134	1.13901
	0.135	1.14075
	0.136	1.14212
	0.137	1.14773
	0.138	1.15334
	0.139	1.15932
	0.14	1.16488
	0.141	1.17076
	0.142	1.17734
	0.143	1.18518
	0.144	1.19273
	0.145	1.20069
	0.146	1.20634
	0.147	1.2102
	0.148	1.21504
	0.149	1.21905
	0.15	1.22111
	0.151	1.22283
	0.152	1.22474
	0.153	1.22681
	0.154	1.2284
	0.155	1.22953
	0.156	1.22942
	0.157	1.22823
	0.158	1.22757
	0.159	1.22711
	0.16	1.22443
	0.161	1.22223
	0.162	1.22119
	0.163	1.22003
	0.164	1.21938
	0.165	1.22007
	0.166	1.22064
	0.167	1.2206
	0.168	1.22129
	0.169	1.22091
	0.17	1.2205
	0.171	1.21866
	0.172	1.21803
	0.173	1.21781
	0.174	1.21497
	0.175	1.21123
	0.176	1.20698
	0.177	1.20005
	0.178	1.19125
	0.179	1.17781
	0.18	1.16165
	0.181	1.14445
	0.182	1.12427
	0.183	1.10323
	0.184	1.08139
	0.185	1.05934
	0.186	1.03849
	0.187	1.01803
	0.188	0.99606
	0.189	0.974392
	0.19	0.952931
	0.191	0.931496
	0.192	0.911758
	0.193	0.892505
	0.194	0.874647
	0.195	0.855293
	0.196	0.83737
	0.197	0.819891
	0.198	0.802507
	0.199	0.784951
	0.2	0.768072
	0.201	0.752801
	0.202	0.738319
	0.203	0.723908
	0.204	0.710439
	0.205	0.696505
	0.206	0.68307
	0.207	0.670274
	0.208	0.657129
	0.209	0.642811
	0.21	0.630333
	0.211	0.617752
	0.212	0.606689
	0.213	0.595116
	0.214	0.585332
	0.215	0.574821
	0.216	0.563852
	0.217	0.554758
	0.218	0.545198
	0.219	0.535171
	0.22	0.52532
	0.221	0.516297
	0.222	0.50736
	0.223	0.498016
	0.224	0.489969
	0.225	0.482417
	0.226	0.474311
	0.227	0.46647
	0.228	0.458063
	0.229	0.450512
	0.23	0.443754
	0.231	0.436857
	0.232	0.429499
	0.233	0.423119
	0.234	0.416733
	0.235	0.411036
	0.236	0.406222
	0.237	0.400485
	0.238	0.39541
	0.239	0.388675
	0.24	0.38301
	0.241	0.379008
	0.242	0.375518
	0.243	0.371307
	0.244	0.367209
	0.245	0.363231
	0.246	0.359486
	0.247	0.356122
	0.248	0.35153
	0.249	0.348602
	0.25	0.346709
	0.251	0.344315
	0.252	0.34195
	0.253	0.340585
	0.254	0.338722
	0.255	0.33889
	0.256	0.338687
	0.257	0.339078
	0.258	0.340688
	0.259	0.342922
	0.26	0.344623
	0.261	0.345834
	0.262	0.346854
	0.263	0.348323
	0.264	0.350094
	0.265	0.351722
	0.266	0.353827
	0.267	0.356731
	0.268	0.359425
	0.269	0.362032
	0.27	0.363666
	0.271	0.364972
	0.272	0.366385
	0.273	0.367819
	0.274	0.368957
	0.275	0.369602
	0.276	0.370461
	0.277	0.371125
	0.278	0.371577
	0.279	0.372668
	0.28	0.374504
	0.281	0.376176
	0.282	0.377976
	0.283	0.379698
	0.284	0.381198
	0.285	0.381864
	0.286	0.382046
	0.287	0.38279
	0.288	0.384054
	0.289	0.386486
	0.29	0.389011
	0.291	0.390497
	0.292	0.391277
	0.293	0.392034
	0.294	0.3928
	0.295	0.394064
	0.296	0.395544
	0.297	0.396385
	0.298	0.397859
	0.299	0.39846
	0.3	0.3986
	0.301	0.398661
	0.302	0.398418
	0.303	0.397673
	0.304	0.397031
	0.305	0.39522
	0.306	0.392915
	0.307	0.391019
	0.308	0.389023
	0.309	0.386458
	0.31	0.38459
	0.311	0.382334
	0.312	0.379793
	0.313	0.37771
	0.314	0.375078
	0.315	0.372421
	0.316	0.369642
	0.317	0.366317
	0.318	0.363514
	0.319	0.360801
	0.32	0.358451
	0.321	0.356574
	0.322	0.354636
	0.323	0.353094
	0.324	0.351313
	0.325	0.349456
	0.326	0.347651
	0.327	0.345264
	0.328	0.342559
	0.329	0.339945
	0.33	0.336993
	0.331	0.334158
	0.332	0.332138
	0.333	0.329897
	0.334	0.327968
	0.335	0.326501
	0.336	0.324798
	0.337	0.322906
	0.338	0.32054
	0.339	0.318283
	0.34	0.315503
	0.341	0.312408
	0.342	0.309685
	0.343	0.306706
	0.344	0.304017
	0.345	0.301914
	0.346	0.299488
	0.347	0.297228
	0.348	0.295289
	0.349	0.293819
	0.35	0.291975
	0.351	0.289766
	0.352	0.288201
	0.353	0.286597
	0.354	0.284653
	0.355	0.282343
	0.356	0.28066
	0.357	0.279176
	0.358	0.277224
	0.359	0.275129
	0.36	0.273118
	0.36	0.271287
	0.361	0.269964
	0.362	0.268417
	0.363	0.266732
	0.364	0.264599
	0.365	0.262743
	0.366	0.261678
	0.367	0.260191
	0.368	0.257327
	0.369	0.254234
	0.37	0.252144
	0.371	0.249927
	0.372	0.24688
	0.373	0.244207
	0.374	0.242153
	0.375	0.239954
	0.376	0.238081
	0.377	0.236879
	0.378	0.235687
	0.379	0.234457
	0.38	0.232883
	0.381	0.230952
	0.382	0.228537
	0.383	0.225533
	0.384	0.222353
	0.385	0.220442
	0.386	0.218329
	0.387	0.216493
	0.388	0.214724
	0.389	0.213304
	0.39	0.212014
	0.391	0.210602
	0.392	0.209697
	0.393	0.208151
	0.394	0.206266
	0.395	0.20435
	0.396	0.202638
	0.397	0.200961
	0.398	0.199203
	0.399	0.19666
	0.4	0.194938
	0.401	0.193157
	0.402	0.190913
	0.403	0.187915
	0.404	0.18552
	0.405	0.18374
	0.406	0.181812
	0.407	0.180333
	0.408	0.179057
	0.409	0.177601
	0.41	0.176174
	0.411	0.174605
	0.412	0.172597
	0.413	0.170102
	0.414	0.168072
	0.415	0.166885
	0.416	0.164821
	0.417	0.162754
	0.418	0.161171
	0.419	0.160387
	0.42	0.15906
	0.421	0.157334
	0.422	0.156249
	0.423	0.155081
	0.424	0.153486
	0.425	0.151944
	0.426	0.149884
	0.427	0.147296
	0.428	0.144889
	0.429	0.142436
	0.43	0.140548
	0.431	0.139175
	0.432	0.13913
	0.433	0.137785
	0.434	0.136364
	0.435	0.135333
	0.436	0.132869
	0.437	0.131945
	0.438	0.130632
	0.439	0.12759
	0.44	0.125282
	0.441	0.122996
	0.442	0.120812
	0.443	0.120394
	0.444	0.117887
	0.445	0.116211
	0.446	0.11428
	0.447	0.112448
	0.448	0.11
	0.449	0.108902
	0.45	0.106426
	0.451	0.105152
	0.452	0.103406
	0.453	0.103109
	0.454	0.102647
	0.455	0.100978
	0.456	0.0998584
	0.457	0.0981115
	0.458	0.096148
	0.459	0.0943538
	0.46	0.0917268
	0.461	0.0899934
	0.462	0.0885359
	0.463	0.0872353
	0.464	0.0866346
	0.465	0.0837927
	0.466	0.0819059
	0.467	0.0800781
	0.468	0.0792235
	0.469	0.0780067
	0.47	0.0766135
	0.471	0.0743978
	0.472	0.0729467
	0.473	0.0709695
	0.474	0.0708859
	0.475	0.0698788
	0.476	0.0696794
	0.477	0.0700427
	0.478	0.0703812
	0.479	0.0704099
	0.48	0.0698768
	0.481	0.0680609
	0.482	0.065203
	0.483	0.0638023
	0.484	0.0624606
	0.485	0.060548
	0.486	0.0598836
	0.487	0.0577366
	0.488	0.0549485
	0.489	0.0540758
	0.49	0.0541721
	0.491	0.0533551
	0.492	0.0522796
	0.493	0.0504284
	0.494	0.0494508
	0.495	0.0473089
	0.496	0.0460629
	0.497	0.0446018
	0.498	0.0427944
	0.499	0.0407494
	0.5	0.0396847
	0.501	0.0371745
	0.502	0.035283
	0.503	0.0332115
	0.504	0.030705
	0.505	0.0286193
	0.506	0.0269381
	0.507	0.0249483
	0.508	0.0235122
	0.509	0.0217844
	0.51	0.0201714
	0.511	0.0182326
	0.512	0.0163034
	0.513	0.0139267
	0.514	0.0111692
	0.515	0.0101391
	0.516	0.00898648
	0.517	0.00749388
	0.518	0.00544391
	0.519	0.00405483
	0.52	0.00264688
	0.521	0.00165219
	0.522	-0.0001905
	0.523	-0.000826
	0.524	-0.0022322
	0.525	-0.0031752
	0.526	-0.0040097
	0.527	-0.0058572
	0.528	-0.0080401
	0.529	-0.0097713
	0.53	-0.0115097
	0.531	-0.012463
	0.532	-0.0139219
	0.533	-0.0153089
	0.534	-0.0152457
	0.535	-0.0164409
	0.536	-0.0179516
	0.537	-0.018941
	0.538	-0.0187289
	0.539	-0.0206112
	0.54	-0.0234622
	0.541	-0.0247699
	0.542	-0.0263594
	0.543	-0.0278432
	0.544	-0.0283961
	0.545	-0.0286082
	0.546	-0.0298596
	0.547	-0.0309022
	0.548	-0.0309233
	0.549	-0.0311976
	0.55	-0.0324818
	0.551	-0.0334613
	0.552	-0.0345634
	0.553	-0.0354715
	0.554	-0.0360766
	0.555	-0.0363052
	0.556	-0.037499
	0.557	-0.0376044
	0.558	-0.0383582
	0.559	-0.0393547
	0.56	-0.0397268
	0.561	-0.0407743
	0.562	-0.0419153
	0.563	-0.0429468
	0.564	-0.0435596
	0.565	-0.0442708
	0.566	-0.0458538
	0.567	-0.0472463
	0.568	-0.0489297
	0.569	-0.0502104
	0.57	-0.0518512
	0.571	-0.0534129
	0.572	-0.0544199
	0.573	-0.0561642
	0.574	-0.0582144
	0.575	-0.0607638
	0.576	-0.0631914
	0.577	-0.0645771
	0.578	-0.0664961
	0.579	-0.0687039
	0.58	-0.070411
	0.581	-0.0717774
	0.582	-0.0716418
	0.583	-0.0720471
	0.584	-0.0731796
	0.585	-0.0739397
	0.586	-0.0748897
	0.587	-0.0766043
	0.588	-0.0796603
	0.589	-0.0800034
	0.59	-0.079988
	0.591	-0.08087
	0.592	-0.0823341
	0.593	-0.0842185
	0.594	-0.086665
	0.595	-0.0889609
	0.596	-0.0904922
	0.597	-0.091474
	0.598	-0.0929459
	0.599	-0.0948137
	0.6	-0.0957923
	0.601	-0.0965061
	0.602	-0.0975616
	0.603	-0.0991429
	0.604	-0.100809
	0.605	-0.102021
	0.606	-0.103246
	0.607	-0.104902
	0.608	-0.106398
	0.609	-0.107551
	0.61	-0.108959
	0.611	-0.110165
	0.612	-0.111094
	0.613	-0.112024
	0.614	-0.113312
	0.615	-0.114863
	0.616	-0.116116
	0.617	-0.11685
	0.618	-0.117588
	0.619	-0.118649
	0.62	-0.119735
	0.621	-0.120714
	0.622	-0.121367
	0.623	-0.121902
	0.624	-0.123314
	0.625	-0.124406
	0.626	-0.125692
	0.627	-0.127196
	0.628	-0.127647
	0.629	-0.12799
	0.63	-0.128953
	0.631	-0.129968
	0.632	-0.131704
	0.633	-0.13378
	0.634	-0.135323
	0.635	-0.13677
	0.636	-0.137976
	0.637	-0.138803
	0.638	-0.139379
	0.639	-0.1401
	0.64	-0.141063
	0.641	-0.141651
	0.642	-0.141877
	0.643	-0.141799
	0.644	-0.141099
	0.645	-0.140756
	0.646	-0.141116
	0.647	-0.141881
	0.648	-0.142734
	0.649	-0.143243
	0.65	-0.143847
	0.651	-0.144794
	0.652	-0.145765
	0.653	-0.146431
	0.654	-0.147426
	0.655	-0.148643
	0.656	-0.150465
	0.657	-0.152178
	0.658	-0.153571
	0.659	-0.154567
	0.66	-0.15529
	0.661	-0.15639
	0.662	-0.157735
	0.663	-0.158531
	0.664	-0.158876
	0.665	-0.159608
	0.666	-0.16013
	0.667	-0.160989
	0.668	-0.162001
	0.669	-0.162791
	0.669	-0.163655
	0.67	-0.164458
	0.671	-0.165624
	0.672	-0.167229
	0.673	-0.168152
	0.674	-0.168594
	0.675	-0.169796
	0.676	-0.171363
	0.677	-0.173379
	0.678	-0.175511
	0.679	-0.177123
	0.68	-0.178495
	0.681	-0.180422
	0.682	-0.181983
	0.683	-0.183489
	0.684	-0.184992
	0.685	-0.186164
	0.686	-0.187066
	0.687	-0.187228
	0.688	-0.187777
	0.689	-0.188775
	0.69	-0.189696
	0.691	-0.19059
	0.692	-0.190846
	0.693	-0.192049
	0.694	-0.193056
	0.695	-0.193021
	0.696	-0.193098
	0.697	-0.193767
	0.698	-0.195006
	0.699	-0.196091
	0.7	-0.19738
	0.701	-0.196933
	0.702	-0.197548
	0.703	-0.198705
	0.704	-0.199421
	0.705	-0.200234
	0.706	-0.200235
	0.707	-0.20107
	0.708	-0.202429
	0.709	-0.203379
	0.71	-0.204099
	0.711	-0.20471
	0.712	-0.205451
	0.713	-0.206974
	0.714	-0.20776
	0.715	-0.208315
	0.716	-0.208662
	0.717	-0.209825
	0.718	-0.211546
	0.719	-0.212584
	0.72	-0.213772
	0.721	-0.215007
	0.722	-0.216446
	0.723	-0.217417
	0.724	-0.218969
	0.725	-0.219534
	0.726	-0.219696
	0.727	-0.219667
	0.728	-0.220272
	0.729	-0.220304
	0.73	-0.221476
	0.731	-0.221803
	0.732	-0.222136
	0.733	-0.222327
	0.734	-0.223158
	0.735	-0.224036
	0.736	-0.225492
	0.737	-0.226782
	0.738	-0.228686
	0.739	-0.229907
	0.74	-0.231925
	0.741	-0.233374
	0.742	-0.235823
	0.743	-0.23786
	0.744	-0.240037
	0.745	-0.242114
	0.746	-0.244089
	0.747	-0.2461
	0.748	-0.247531
	0.749	-0.24871
	0.75	-0.249997
	0.751	-0.252115
	0.752	-0.253526
	0.753	-0.253964
	0.754	-0.255418
	0.755	-0.256024
	0.756	-0.256619
	0.757	-0.25692
	0.758	-0.257787
	0.759	-0.258769
	0.76	-0.259433
	0.761	-0.260215
	0.762	-0.260949
	0.763	-0.262235
	0.764	-0.263518
	0.765	-0.26511
	0.766	-0.267551
	0.767	-0.268502
	0.768	-0.26788
	0.769	-0.268528
	0.77	-0.269508
	0.771	-0.269806
	0.772	-0.270854
	0.773	-0.271516
	0.774	-0.27175
	0.775	-0.272707
	0.776	-0.273256
	0.777	-0.274874
	0.778	-0.275981
	0.779	-0.276903
	0.78	-0.277443
	0.781	-0.27912
	0.782	-0.279496
	0.783	-0.280499
	0.784	-0.280853
	0.785	-0.282065
	0.786	-0.282738
	0.787	-0.282819
	0.788	-0.282456
	0.789	-0.283221
	0.79	-0.283216
	0.791	-0.284531
	0.792	-0.284374
	0.793	-0.285818
	0.794	-0.28692
	0.795	-0.288485
	0.796	-0.28996
	0.797	-0.290787
	0.798	-0.291614
	0.799	-0.292598
	0.8	-0.292252
	0.801	-0.293333
	0.802	-0.293443
	0.803	-0.294338
	0.804	-0.294038
	0.805	-0.295157
	0.806	-0.295713
	0.807	-0.296629
	0.808	-0.297462
	0.809	-0.299015
	0.81	-0.301213
	0.811	-0.302621
	0.812	-0.303359
	0.813	-0.302923
	0.814	-0.302978
	0.815	-0.303019
	0.816	-0.303006
	0.817	-0.304256
	0.818	-0.305297
	0.819	-0.307407
	0.82	-0.307749
	0.821	-0.308725
	0.822	-0.308838
	0.823	-0.309259
	0.824	-0.310337
	0.825	-0.311138
	0.826	-0.312014
	0.827	-0.311887
	0.828	-0.312088
	0.829	-0.312979
	0.83	-0.313652
	0.831	-0.313636
	0.832	-0.314293
	0.833	-0.314941
	0.834	-0.31631
	0.835	-0.316836
	0.836	-0.316711
	0.837	-0.318347
	0.838	-0.32015
	0.839	-0.320583
	0.84	-0.321442
	0.841	-0.321815
	0.842	-0.323092
	0.843	-0.322871
	0.844	-0.322883
	0.845	-0.323091
	0.846	-0.324237
	0.847	-0.325383
	0.848	-0.326051
	0.849	-0.325886
	0.85	-0.327825
	0.851	-0.327474
	0.852	-0.328808
	0.853	-0.330147
	0.854	-0.332258
	0.855	-0.332963
	0.856	-0.334906
	0.857	-0.336705
	0.858	-0.337104
	0.859	-0.337887
	0.86	-0.338007
	0.861	-0.338038
	0.862	-0.339085
	0.863	-0.340157
	0.864	-0.342224
	0.865	-0.344056
	0.866	-0.344667
	0.867	-0.345047
	0.868	-0.345901
	0.869	-0.345931
	0.87	-0.346685
	0.871	-0.34776
	0.872	-0.348553
	0.873	-0.35003
	0.874	-0.351488
	0.875	-0.352312
	0.876	-0.353205
	0.877	-0.354556
	0.878	-0.354729
	0.879	-0.355545
	0.88	-0.356791
	0.881	-0.357834
	0.882	-0.358541
	0.883	-0.359893
	0.884	-0.360513
	0.885	-0.361871
	0.886	-0.363731
	0.887	-0.363953
	0.888	-0.363745
	0.889	-0.36464
	0.89	-0.365461
	0.891	-0.366049
	0.892	-0.366479
	0.893	-0.367079
	0.894	-0.368296
	0.895	-0.368895
	0.896	-0.368835
	0.897	-0.368729
	0.898	-0.36965
	0.899	-0.370728
	0.9	-0.371243
	0.901	-0.371886
	0.902	-0.37253
	0.903	-0.372648
	0.904	-0.372391
	0.905	-0.372138
	0.906	-0.372204
	0.907	-0.372276
	0.908	-0.372131
	0.909	-0.372437
	0.91	-0.372697
	0.911	-0.373304
	0.912	-0.373506
	0.913	-0.374131
	0.914	-0.374551
	0.915	-0.374745
	0.916	-0.375189
	0.917	-0.374975
	0.918	-0.37493
	0.919	-0.375257
	0.92	-0.375681
	0.921	-0.376079
	0.922	-0.376327
	0.923	-0.376468
	0.924	-0.376396
	0.925	-0.376338
	0.926	-0.376345
	0.927	-0.376453
	0.928	-0.377059
	0.929	-0.37736
	0.93	-0.377176
	0.931	-0.377511
	0.932	-0.378598
	0.933	-0.379248
	0.934	-0.379503
	0.935	-0.379254
	0.936	-0.379132
	0.937	-0.379928
	0.938	-0.380797
	0.939	-0.381247
	0.94	-0.381673
	0.941	-0.382638
	0.942	-0.383608
	0.943	-0.384703
	0.944	-0.385251
	0.945	-0.385677
	0.946	-0.386185
	0.947	-0.386635
	0.948	-0.386967
	0.949	-0.387593
	0.95	-0.387849
	0.951	-0.388018
	0.952	-0.389002
	0.953	-0.390057
	0.954	-0.391131
	0.955	-0.391829
	0.956	-0.392206
	0.957	-0.392662
	0.958	-0.393428
	0.959	-0.393772
	0.96	-0.39394
	0.961	-0.394222
	0.962	-0.394657
	0.963	-0.395332
	0.964	-0.39581
	0.965	-0.396397
	0.966	-0.397387
	0.967	-0.398489
	0.968	-0.399285
	0.969	-0.399944
	0.97	-0.400447
	0.971	-0.400838
	0.972	-0.402054
	0.973	-0.403412
	0.974	-0.403884
	0.975	-0.404176
	0.976	-0.404681
	0.977	-0.405585
	0.978	-0.406548
	0.978	-0.407758
	0.979	-0.408392
	0.98	-0.408244
	0.981	-0.408591
	0.982	-0.409399
	0.983	-0.409952
	0.984	-0.410652
	0.985	-0.411034
	0.986	-0.411857
	0.987	-0.41316
	0.988	-0.413723
	0.989	-0.414662
	0.99	-0.415076
	0.991	-0.415094
	0.992	-0.41534
	0.993	-0.415501
	0.994	-0.416051
	0.995	-0.416821
	0.996	-0.417528
	0.997	-0.418187
	0.998	-0.419149
	0.999	-0.420101
	1	-0.421244
	1.001	-0.421898
	1.002	-0.42176
	1.003	-0.422072
	1.004	-0.423094
	1.005	-0.423904
	1.006	-0.424711
	1.007	-0.425884
	1.008	-0.4265
	1.009	-0.426903
	1.01	-0.427469
	1.011	-0.42769
	1.012	-0.428426
	1.013	-0.429274
	1.014	-0.42995
	1.015	-0.430497
	1.016	-0.431301
	1.017	-0.432437
	1.018	-0.433313
	1.019	-0.434427
	1.02	-0.435749
	1.021	-0.43556
	1.022	-0.436125
	1.023	-0.43646
	1.024	-0.437525
	1.025	-0.439473
	1.026	-0.440406
	1.027	-0.441436
	1.028	-0.441919
	1.029	-0.442337
	1.03	-0.443921
	1.031	-0.444651
	1.032	-0.444543
	1.033	-0.444649
	1.034	-0.445225
	1.035	-0.446308
	1.036	-0.447241
	1.037	-0.44804
	1.038	-0.449162
	1.039	-0.449453
	1.04	-0.449935
	1.041	-0.450793
	1.042	-0.452063
	1.043	-0.453139
	1.044	-0.453882
	1.045	-0.454562
	1.046	-0.455033
	1.047	-0.455633
	1.048	-0.455178
	1.049	-0.455035
	1.05	-0.456208
	1.051	-0.457678
	1.052	-0.458913
	1.053	-0.460013
	1.054	-0.460398
	1.055	-0.460994
	1.056	-0.461748
	1.057	-0.46192
	1.058	-0.462477
	1.059	-0.464117
	1.06	-0.465065
	1.061	-0.465708
	1.062	-0.465888
	1.063	-0.465525
	1.064	-0.465614
	1.065	-0.466018
	1.066	-0.466555
	1.067	-0.467187
	1.068	-0.467472
	1.069	-0.467453
	1.07	-0.467801
	1.071	-0.469014
	1.072	-0.468496
	1.073	-0.469155
	1.074	-0.470444
	1.075	-0.470314
	1.076	-0.470576
	1.077	-0.471262
	1.078	-0.471321
	1.079	-0.471753
	1.08	-0.472863
	1.081	-0.473199
	1.082	-0.473013
	1.083	-0.473289
	1.084	-0.474001
	1.085	-0.473641
	1.086	-0.474288
	1.087	-0.473277
	1.088	-0.47372
	1.089	-0.474984
	1.09	-0.476351
	1.091	-0.477421
	1.092	-0.47726
	1.093	-0.477532
	1.094	-0.477689
	1.095	-0.478519
	1.096	-0.479367
	1.097	-0.480332
	1.098	-0.480829
	1.099	-0.482191
	1.1	-0.482039
	1.101	-0.481626
	1.102	-0.481824
	1.103	-0.482477
	1.104	-0.48227
	1.105	-0.483361
	1.106	-0.483241
	1.107	-0.48388
	1.108	-0.48452
	1.109	-0.484929
	1.11	-0.4859
	1.111	-0.48671
	1.112	-0.487189
	1.113	-0.488031
	1.114	-0.488943
	1.115	-0.489545
	1.116	-0.490776
	1.117	-0.490607
	1.118	-0.491033
	1.119	-0.492035
	1.12	-0.49179
	1.121	-0.492243
	1.122	-0.492511
	1.123	-0.492992
	1.124	-0.493036
	1.125	-0.494275
	1.126	-0.494805
	1.127	-0.494823
	1.128	-0.496342
	1.129	-0.496877
	1.13	-0.496562
	1.131	-0.497955
	1.132	-0.499275
	1.133	-0.500946
	1.134	-0.501549
	1.135	-0.503309
	1.136	-0.503596
	1.137	-0.504243
	1.138	-0.504159
	1.139	-0.503823
	1.14	-0.504013
	1.141	-0.504889
	1.142	-0.506056
	1.143	-0.507104
	1.144	-0.508118
	1.145	-0.507902
	1.146	-0.507946
	1.147	-0.508378
	1.148	-0.508974
	1.149	-0.509726
	1.15	-0.511406
	1.151	-0.511604
	1.152	-0.512409
	1.153	-0.511994
	1.154	-0.513095
	1.155	-0.513156
	1.156	-0.514135
	1.157	-0.514185
	1.158	-0.515315
	1.159	-0.51558
	1.16	-0.516428
	1.161	-0.517883
	1.162	-0.519406
	1.163	-0.521236
	1.164	-0.521982
	1.165	-0.522205
	1.166	-0.522414
	1.167	-0.523967
	1.168	-0.525048
	1.169	-0.525929
	1.17	-0.527374
	1.171	-0.52858
	1.172	-0.514477
	1.173	-0.502421
	1.174	-0.501455
	1.175	-0.501482
	1.176	-0.501307
	1.177	-0.501092
	1.178	-0.50052
	1.179	-0.500317
	1.18	-0.500375
	1.181	-0.500679
	1.182	-0.500772
	1.183	-0.500465
	1.184	-0.500086
	1.185	-0.499835
	1.186	-0.500252
	1.187	-0.50013
	1.188	-0.499895
	1.189	-0.500169
	1.19	-0.500398
	1.191	-0.500426
	1.192	-0.500529
	1.193	-0.499838
	1.194	-0.498754
	1.195	-0.498271
	1.196	-0.498715
	1.197	-0.498808
	1.198	-0.498107
	1.199	-0.497206
	1.2	-0.497014
	1.201	-0.496594
	1.202	-0.496331
	1.203	-0.496481
	1.204	-0.497126
	1.205	-0.497354
	1.206	-0.497773
	1.207	-0.497733
	1.208	-0.497623
	1.209	-0.497724
	1.21	-0.498364
	1.211	-0.499186
	1.212	-0.499778
	1.213	-0.500697
	1.214	-0.501437
	1.215	-0.501776
	1.216	-0.502866
	1.217	-0.503503
	1.218	-0.503406
	1.219	-0.503538
	1.22	-0.503853
	1.221	-0.503988
	1.222	-0.504556
	1.223	-0.504385
	1.224	-0.50442
	1.225	-0.504172
	1.226	-0.504432
	1.227	-0.504308
	1.228	-0.503487
	1.229	-0.503505
	1.23	-0.503994
	1.231	-0.503953
	1.232	-0.504609
	1.233	-0.504794
	1.234	-0.505113
	1.235	-0.506467
	1.236	-0.508107
	1.237	-0.509692
	1.238	-0.510684
	1.239	-0.512242
	1.24	-0.513562
	1.241	-0.51455
	1.242	-0.515678
	1.243	-0.51698
	1.244	-0.518952
	1.245	-0.520834
	1.246	-0.522543
	1.247	-0.523302
	1.248	-0.525353
	1.249	-0.527271
	1.25	-0.527844
	1.251	-0.5291
	1.252	-0.529711
	1.253	-0.531628
	1.254	-0.53344
	1.255	-0.534297
	1.256	-0.53521
	1.257	-0.536889
	1.258	-0.53736
	1.259	-0.53783
	1.26	-0.538539
	1.261	-0.53992
	1.262	-0.541248
	1.263	-0.541273
	1.264	-0.541572
	1.265	-0.541942
	1.266	-0.54245
	1.267	-0.543382
	1.268	-0.545334
	1.269	-0.547121
	1.27	-0.548513
	1.271	-0.550412
	1.272	-0.552426
	1.273	-0.554307
	1.274	-0.555942
	1.275	-0.558155
	1.276	-0.560618
	1.277	-0.562255
	1.278	-0.564855
	1.279	-0.566893
	1.28	-0.568663
	1.281	-0.569949
	1.282	-0.571197
	1.283	-0.573146
	1.284	-0.57495
	1.285	-0.575797
	1.286	-0.575698
	1.287	-0.575187
	1.288	-0.57726
	1.288	-0.577673
	1.289	-0.577819
	1.29	-0.578031
	1.291	-0.578443
	1.292	-0.579796
	1.293	-0.580586
	1.294	-0.580915
	1.295	-0.581708
	1.296	-0.583147
	1.297	-0.583675
	1.298	-0.584801
	1.299	-0.586684
	1.3	-0.587399
	1.301	-0.588925
	1.302	-0.58958
	1.303	-0.589848
	1.304	-0.591106
	1.305	-0.591741
	1.306	-0.591403
	1.307	-0.592167
	1.308	-0.592894
	1.309	-0.593392
	1.31	-0.593084
	1.311	-0.593204
	1.312	-0.594074
	1.313	-0.595004
	1.314	-0.59637
	1.315	-0.597204
	1.316	-0.596414
	1.317	-0.596268
	1.318	-0.595138
	1.319	-0.594183
	1.32	-0.59515
	1.321	-0.594352
	1.322	-0.593862
	1.323	-0.593643
	1.324	-0.593539
	1.325	-0.592199
	1.326	-0.592996
	1.327	-0.59253
	1.328	-0.592228
	1.329	-0.591983
	1.33	-0.591619
	1.331	-0.590987
	1.332	-0.590778
	1.333	-0.59085
	1.334	-0.591213
	1.335	-0.591391
	1.336	-0.591959
	1.337	-0.591543
	1.338	-0.592248
	1.339	-0.592777
	1.34	-0.593435
	1.341	-0.594032
	1.342	-0.594317
	1.343	-0.593822
	1.344	-0.594356
	1.345	-0.594734
	1.346	-0.594984
	1.347	-0.595689
	1.348	-0.59531
	1.349	-0.595688
	1.35	-0.5964
	1.351	-0.596652
	1.352	-0.596407
	1.353	-0.596559
	1.354	-0.59734
	1.355	-0.598251
	1.356	-0.599522
	1.357	-0.600811
	1.358	-0.602104
	1.359	-0.602987
	1.36	-0.603046
	1.361	-0.604164
	1.362	-0.605847
	1.363	-0.606854
	1.364	-0.608683
	1.365	-0.61004
	1.366	-0.611581
	1.367	-0.612974
	1.368	-0.61451
	1.369	-0.616209
	1.37	-0.616501
	1.371	-0.617587
	1.372	-0.618971
	1.373	-0.620522
	1.374	-0.621408
	1.375	-0.623539
	1.376	-0.624158
	1.377	-0.62688
	1.378	-0.628177
	1.379	-0.629846
	1.38	-0.63166
	1.381	-0.632968
	1.382	-0.634719
	1.383	-0.635194
	1.384	-0.635659
	1.385	-0.636423
	1.386	-0.63759
	1.387	-0.638199
	1.388	-0.639333
	1.389	-0.638861
	1.39	-0.639432
	1.391	-0.640058
	1.392	-0.640068
	1.393	-0.640637
	1.394	-0.641292
	1.395	-0.641406
	1.396	-0.641072
	1.397	-0.641266
	1.398	-0.642567
	1.399	-0.642659
	1.4	-0.64281
	1.401	-0.643091
	1.402	-0.643754
	1.403	-0.644157
	1.404	-0.644252
	1.405	-0.644225
	1.406	-0.644464
	1.407	-0.64453
	1.408	-0.644071
	1.409	-0.643616
	1.41	-0.643847
	1.411	-0.643511
	1.412	-0.642818
	1.413	-0.642169
	1.414	-0.640649
	1.415	-0.638916
	1.416	-0.637669
	1.417	-0.636434
	1.418	-0.635793
	1.419	-0.635194
	1.42	-0.634149
	1.421	-0.633334
	1.422	-0.632255
	1.423	-0.630592
	1.424	-0.629527
	1.425	-0.627119
	1.426	-0.624821
	1.427	-0.622317
	1.428	-0.620324
	1.429	-0.617551
	1.43	-0.614865
	1.431	-0.612582
	1.432	-0.610164
	1.433	-0.608661
	1.434	-0.607322
	1.435	-0.605299
	1.436	-0.60276
	1.437	-0.60079
	1.438	-0.597647
	1.439	-0.5962
	1.44	-0.594233
	1.441	-0.591899
	1.442	-0.589906
	1.443	-0.587978
	1.444	-0.585532
	1.445	-0.58335
	1.446	-0.581743
	1.447	-0.5798
	1.448	-0.576969
	1.449	-0.574461
	1.45	-0.57252
	1.451	-0.570234
	1.452	-0.567944
	1.453	-0.566111
	1.454	-0.564225
	1.455	-0.561861
	1.456	-0.559166
	1.457	-0.556913
	1.458	-0.555363
	1.459	-0.554179
	1.46	-0.552686
	1.461	-0.551333
	1.462	-0.550278
	1.463	-0.549532
	1.464	-0.548525
	1.465	-0.546929
	1.466	-0.545628
	1.467	-0.544597
	1.468	-0.54412
	1.469	-0.543953
	1.47	-0.543508
	1.471	-0.543237
	1.472	-0.543209
	1.473	-0.542888
	1.474	-0.542076
	1.475	-0.542072
	1.476	-0.542523
	1.477	-0.542758
	1.478	-0.543195
	1.479	-0.54387
	1.48	-0.545036
	1.481	-0.54625
	1.482	-0.547637
	1.483	-0.548686
	1.484	-0.548652
	1.485	-0.549335
	1.486	-0.551125
	1.487	-0.552607
	1.488	-0.553872
	1.489	-0.554791
	1.49	-0.555938
	1.491	-0.557134
	1.492	-0.557983
	1.493	-0.558945
	1.494	-0.560357
	1.495	-0.561624
	1.496	-0.563013
	1.497	-0.564823
	1.498	-0.566773
	1.499	-0.56853
	1.5	-0.570039
	1.501	-0.572018
	1.502	-0.574421
	1.503	-0.576057
	1.504	-0.577192
	1.505	-0.578117
	1.506	-0.579627
	1.507	-0.580981
	1.508	-0.582278
	1.509	-0.584173
	1.51	-0.586357
	1.511	-0.587783
	1.512	-0.588875
	1.513	-0.590102
	1.514	-0.591179
	1.515	-0.593141
	1.516	-0.595208
	1.517	-0.597088
	1.518	-0.598506
	1.519	-0.599673
	1.52	-0.600971
	1.521	-0.60221
	1.522	-0.604155
	1.523	-0.605877
	1.524	-0.607467
	1.525	-0.60918
	1.526	-0.610312
	1.527	-0.611292
	1.528	-0.61228
	1.529	-0.613389
	1.53	-0.614696
	1.531	-0.615668
	1.532	-0.616144
	1.533	-0.616293
	1.534	-0.617902
	1.535	-0.620091
	1.536	-0.620404
	1.537	-0.620746
	1.538	-0.622096
	1.539	-0.623625
	1.54	-0.62516
	1.541	-0.626437
	1.542	-0.628135
	1.543	-0.629712
	1.544	-0.630765
	1.545	-0.631962
	1.546	-0.633583
	1.547	-0.634591
	1.548	-0.635021
	1.549	-0.635665
	1.55	-0.636366
	1.551	-0.637207
	1.552	-0.637773
	1.553	-0.638099
	1.554	-0.638572
	1.555	-0.640204
	1.556	-0.640925
	1.557	-0.642452
	1.558	-0.644025
	1.559	-0.644076
	1.56	-0.643971
	1.561	-0.645361
	1.562	-0.646254
	1.563	-0.647286
	1.564	-0.648341
	1.565	-0.649479
	1.566	-0.65025
	1.567	-0.651906
	1.568	-0.652568
	1.569	-0.653509
	1.57	-0.653312
	1.571	-0.65473
	1.572	-0.654974
	1.573	-0.65543
	1.574	-0.657337
	1.575	-0.658393
	1.576	-0.659682
	1.577	-0.661377
	1.578	-0.66318
	1.579	-0.664557
	1.58	-0.665733
	1.581	-0.666647
	1.582	-0.667948
	1.583	-0.669704
	1.584	-0.670785
	1.585	-0.6705
	1.586	-0.671153
	1.587	-0.672492
	1.588	-0.672889
	1.589	-0.6733
	1.59	-0.673131
	1.591	-0.673313
	1.592	-0.67394
	1.593	-0.675257
	1.594	-0.675978
	1.595	-0.676488
	1.596	-0.676704
	1.597	-0.676802
	1.597	-0.677446
	1.598	-0.678516
	1.599	-0.679665
	1.6	-0.680066
	1.601	-0.680469
	1.602	-0.681811
	1.603	-0.683125
	1.604	-0.684131
	1.605	-0.685314
	1.606	-0.686714
	1.607	-0.686849
	1.608	-0.688085
	1.609	-0.689487
	1.61	-0.689392
	1.611	-0.690696
	1.612	-0.690534
	1.613	-0.691148
	1.614	-0.691065
	1.615	-0.692064
	1.616	-0.691415
	1.617	-0.692672
	1.618	-0.693127
	1.619	-0.695359
	1.62	-0.696266
	1.621	-0.696216
	1.622	-0.697301
	1.623	-0.696659
	1.624	-0.697935
	1.625	-0.69892
	1.626	-0.699161
	1.627	-0.699533
	1.628	-0.70127
	1.629	-0.702022
	1.63	-0.703015
	1.631	-0.703467
	1.632	-0.703966
	1.633	-0.704714
	1.634	-0.705999
	1.635	-0.707725
	1.636	-0.708773
	1.637	-0.70909
	1.638	-0.710303
	1.639	-0.711395
	1.64	-0.712464
	1.641	-0.713157
	1.642	-0.713736
	1.643	-0.714896
	1.644	-0.716572
	1.645	-0.718561
	1.646	-0.719114
	1.647	-0.720924
	1.648	-0.721987
	1.649	-0.723499
	1.65	-0.72509
	1.651	-0.726451
	1.652	-0.727462
	1.653	-0.728499
	1.654	-0.728805
	1.655	-0.729912
	1.656	-0.729358
	1.657	-0.730632
	1.658	-0.732025
	1.659	-0.732713
	1.66	-0.733665
	1.661	-0.73481
	1.662	-0.736021
	1.663	-0.736572
	1.664	-0.737613
	1.665	-0.738017
	1.666	-0.738907
	1.667	-0.739641
	1.668	-0.740594
	1.669	-0.740976
	1.67	-0.741317
	1.671	-0.742421
	1.672	-0.742965
	1.673	-0.743565
	1.674	-0.742886
	1.675	-0.743568
	1.676	-0.744285
	1.677	-0.745716
	1.678	-0.745462
	1.679	-0.745366
	1.68	-0.74476
	1.681	-0.746219
	1.682	-0.747045
	1.683	-0.746663
	1.684	-0.746691
	1.685	-0.746808
	1.686	-0.747508
	1.687	-0.748558
	1.688	-0.749566
	1.689	-0.750407
	1.69	-0.751207
	1.691	-0.751889
	1.692	-0.751942
	1.693	-0.752914
	1.694	-0.753994
	1.695	-0.753858
	1.696	-0.754997
	1.697	-0.755402
	1.698	-0.755607
	1.699	-0.755686
	1.7	-0.754797
	1.701	-0.755308
	1.702	-0.755646
	1.703	-0.756405
	1.704	-0.757528
	1.705	-0.757594
	1.706	-0.758869
	1.707	-0.759435
	1.708	-0.7597
	1.709	-0.760584
	1.71	-0.761811
	1.711	-0.761597
	1.712	-0.762175
	1.713	-0.763186
	1.714	-0.763845
	1.715	-0.76484
	1.716	-0.766114
	1.717	-0.766457
	1.718	-0.766173
	1.719	-0.766155
	1.72	-0.767252
	1.721	-0.767877
	1.722	-0.768297
	1.723	-0.769411
	1.724	-0.770941
	1.725	-0.772276
	1.726	-0.773697
	1.727	-0.774365
	1.728	-0.775528
	1.729	-0.776777
	1.73	-0.778336
	1.731	-0.778329
	1.732	-0.778593
	1.733	-0.779721
	1.734	-0.781137
	1.735	-0.78254
	1.736	-0.783722
	1.737	-0.784837
	1.738	-0.785052
	1.739	-0.785168
	1.74	-0.785559
	1.741	-0.785828
	1.742	-0.786509
	1.743	-0.786967
	1.744	-0.786827
	1.745	-0.786968
	1.746	-0.787156
	1.747	-0.787429
	1.748	-0.787063
	1.749	-0.786743
	1.75	-0.788449
	1.751	-0.788955
	1.752	-0.78923
	1.753	-0.789237
	1.754	-0.789692
	1.755	-0.79048
	1.756	-0.790829
	1.757	-0.790653
	1.758	-0.790627
	1.759	-0.790857
	1.76	-0.790759
	1.761	-0.791061
	1.762	-0.790907
	1.763	-0.791137
	1.764	-0.791903
	1.765	-0.792636
	1.766	-0.792786
	1.767	-0.792908
	1.768	-0.794094
	1.769	-0.795808
	1.77	-0.796431
	1.771	-0.796762
	1.772	-0.797746
	1.773	-0.798707
	1.774	-0.799406
	1.775	-0.799229
	1.776	-0.798935
	1.777	-0.798741
	1.778	-0.79817
	1.779	-0.798257
	1.78	-0.798598
	1.781	-0.799265
	1.782	-0.799811
	1.783	-0.80035
	1.784	-0.800883
	1.785	-0.800643
	1.786	-0.799728
	1.787	-0.798967
	1.788	-0.79927
	1.789	-0.799585
	1.79	-0.799709
	1.791	-0.800119
	1.792	-0.800859
	1.793	-0.80143
	1.794	-0.802058
	1.795	-0.80269
	1.796	-0.802407
	1.797	-0.802176
	1.798	-0.802824
	1.799	-0.803739
	1.8	-0.803811
	1.801	-0.804339
	1.802	-0.804957
	1.803	-0.805087
	1.804	-0.805301
	1.805	-0.804966
	1.806	-0.804768
	1.807	-0.805315
	1.808	-0.806024
	1.809	-0.806251
	1.81	-0.806465
	1.811	-0.806631
	1.812	-0.807101
	1.813	-0.807541
	1.814	-0.807514
	1.815	-0.806988
	1.816	-0.80645
	1.817	-0.806725
	1.818	-0.806836
	1.819	-0.806624
	1.82	-0.806654
	1.821	-0.806871
	1.822	-0.807073
	1.823	-0.806798
	1.824	-0.806282
	1.825	-0.806698
	1.826	-0.80751
	1.827	-0.807469
	1.828	-0.807661
	1.829	-0.807566
	1.83	-0.807581
	1.831	-0.808577
	1.832	-0.809277
	1.833	-0.809573
	1.834	-0.809578
	1.835	-0.809907
	1.836	-0.810724
	1.837	-0.81156
	1.838	-0.811909
	1.839	-0.812407
	1.84	-0.813365
	1.841	-0.814238
	1.842	-0.814744
	1.843	-0.815156
	1.844	-0.815345
	1.845	-0.815103
	1.846	-0.816121
	1.847	-0.817784
	1.848	-0.81846
	1.849	-0.818314
	1.85	-0.817776
	1.851	-0.816872
	1.852	-0.816248
	1.853	-0.817065
	1.854	-0.817704
	1.855	-0.818407
	1.856	-0.819759
	1.857	-0.820833
	1.858	-0.821899
	1.859	-0.822221
	1.86	-0.822343
	1.861	-0.822775
	1.862	-0.823166
	1.863	-0.823719
	1.864	-0.824954
	1.865	-0.826329
	1.866	-0.828009
	1.867	-0.829581
	1.868	-0.829887
	1.869	-0.830035
	1.87	-0.830443
	1.871	-0.830568
	1.872	-0.829835
	1.873	-0.82959
	1.874	-0.829464
	1.875	-0.829647
	1.876	-0.828896
	1.877	-0.828533
	1.878	-0.828654
	1.879	-0.829834
	1.88	-0.830049
	1.881	-0.829251
	1.882	-0.828533
	1.883	-0.82895
	1.884	-0.829316
	1.885	-0.829617
	1.886	-0.829186
	1.887	-0.828576
	1.888	-0.828191
	1.889	-0.827897
	1.89	-0.827522
	1.891	-0.826467
	1.892	-0.825677
	1.893	-0.825056
	1.894	-0.825076
	1.895	-0.825324
	1.896	-0.826214
	1.897	-0.826201
	1.898	-0.826533
	1.899	-0.826899
	1.9	-0.827828
	1.901	-0.828387
	1.902	-0.828868
	1.903	-0.828935
	1.904	-0.828207
	1.905	-0.828125
	1.906	-0.827712
	1.906	-0.827075
	1.907	-0.82635
	1.908	-0.826961
	1.909	-0.827428
	1.91	-0.827503
	1.911	-0.827202
	1.912	-0.826848
	1.913	-0.825818
	1.914	-0.824909
	1.915	-0.824362
	1.916	-0.823207
	1.917	-0.822977
	1.918	-0.822767
	1.919	-0.821993
	1.92	-0.82196
	1.921	-0.822611
	1.922	-0.823638
	1.923	-0.825015
	1.924	-0.824262
	1.925	-0.823575
	1.926	-0.824292
	1.927	-0.824745
	1.928	-0.823868
	1.929	-0.823964
	1.93	-0.82325
	1.931	-0.82355
	1.932	-0.822653
	1.933	-0.821725
	1.934	-0.820884
	1.935	-0.820569
	1.936	-0.821168
	1.937	-0.821305
	1.938	-0.822189
	1.939	-0.821109
	1.94	-0.821705
	1.941	-0.822777
	1.942	-0.822654
	1.943	-0.821648
	1.944	-0.820536
	1.945	-0.819644
	1.946	-0.818964
	1.947	-0.817475
	1.948	-0.817815
	1.949	-0.816781
	1.95	-0.817224
	1.951	-0.816141
	1.952	-0.815852
	1.953	-0.816097
	1.954	-0.815235
	1.955	-0.815175
	1.956	-0.815049
	1.957	-0.814001
	1.958	-0.812704
	1.959	-0.813111
	1.96	-0.812437
	1.961	-0.812406
	1.962	-0.812217
	1.963	-0.812064
	1.964	-0.811979
	1.965	-0.811246
	1.966	-0.810277
	1.967	-0.811045
	1.968	-0.810112
	1.969	-0.81025
	1.97	-0.808636
	1.971	-0.809253
	1.972	-0.808288
	1.973	-0.806365
	1.974	-0.805992
	1.975	-0.806729
	1.976	-0.805307
	1.977	-0.804424
	1.978	-0.804044
	1.979	-0.803985
	1.98	-0.804002
	1.981	-0.803959
	1.982	-0.803588
	1.983	-0.803161
	1.984	-0.803428
	1.985	-0.80318
	1.986	-0.802174
	1.987	-0.801785
	1.988	-0.800613
	1.989	-0.801246
	1.99	-0.801342
	1.991	-0.799787
	1.992	-0.799018
[truncated: 21,403 more rows]

## Sheet: Supplementary Fig 2j
	Elution volume (ml)	mAU
	0.001	0.00224699
	0.002	0.002209
	0.003	0.00236541
	0.004	0.00247227
	0.005	0.00339475
	0.006	0.00331975
	0.007	0.00264305
	0.008	0.00297924
	0.009	0.00333533
	0.01	0.00285308
	0.011	0.00256322
	0.012	0.00241203
	0.013	0.00190176
	0.014	0.00127241
	0.015	0.00065506
	0.016	-0.0007255
	0.017	-0.0013754
	0.018	-0.0031301
	0.019	-0.004594
	0.02	-0.005237
	0.021	-0.0053035
	0.022	-0.0070917
	0.023	-0.0086206
	0.024	-0.0102405
	0.025	-0.0119676
	0.026	-0.0134067
	0.027	-0.0149682
	0.028	-0.0173035
	0.029	-0.0193475
	0.031	-0.020515
	0.032	-0.0219015
	0.033	-0.0231506
	0.034	-0.0245314
	0.035	-0.0262408
	0.036	-0.0282422
	0.037	-0.0309482
	0.038	-0.0336571
	0.039	-0.0361179
	0.04	-0.0384365
	0.041	-0.0407858
	0.042	-0.0430281
	0.043	-0.0451664
	0.044	-0.0477675
	0.045	-0.0497946
	0.046	-0.0523185
	0.047	-0.0567448
	0.048	-0.0595368
	0.049	-0.061474
	0.05	-0.064046
	0.051	-0.0657977
	0.052	-0.0668325
	0.053	-0.0655169
	0.054	-0.0607861
	0.055	-0.0523357
	0.056	-0.0370404
	0.057	-0.0117306
	0.058	0.0281958
	0.059	0.0837816
	0.06	0.15684
	0.061	0.250432
	0.062	0.3673
	0.063	0.506727
	0.064	0.652733
	0.065	0.784641
	0.066	0.904198
	0.067	1.0149
	0.068	1.11852
	0.069	1.21375
	0.07	1.30674
	0.071	1.39604
	0.072	1.48385
	0.073	1.57054
	0.074	1.65492
	0.076	1.73798
	0.077	1.81981
	0.078	1.89822
	0.079	1.97345
	0.08	2.04755
	0.081	2.11899
	0.082	2.18815
	0.083	2.25622
	0.084	2.32179
	0.085	2.38389
	0.086	2.44469
	0.087	2.50692
	0.088	2.56946
	0.089	2.62921
	0.09	2.68836
	0.091	2.7506
	0.092	2.81494
	0.093	2.87965
	0.094	2.94375
	0.095	3.00886
	0.096	3.07493
	0.097	3.14038
	0.098	3.20268
	0.099	3.26476
	0.1	3.33009
	0.101	3.39307
	0.102	3.45482
	0.103	3.51259
	0.104	3.56609
	0.105	3.61508
	0.106	3.65703
	0.107	3.68811
	0.108	3.70212
	0.109	3.69694
	0.11	3.67449
	0.111	3.63105
	0.112	3.56318
	0.113	3.47108
	0.114	3.37498
	0.115	3.29205
	0.116	3.22217
	0.117	3.16069
	0.118	3.10535
	0.119	3.05632
	0.12	3.01159
	0.122	2.9716
	0.123	2.93642
	0.124	2.90201
	0.125	2.86562
	0.126	2.82824
	0.127	2.79059
	0.128	2.75486
	0.129	2.71973
	0.13	2.68435
	0.131	2.64995
	0.132	2.61587
	0.133	2.58243
	0.134	2.55337
	0.135	2.52684
	0.136	2.49917
	0.137	2.46832
	0.138	2.43666
	0.139	2.4084
	0.14	2.38084
	0.141	2.35184
	0.142	2.31908
	0.143	2.28378
	0.144	2.24889
	0.145	2.2118
	0.146	2.174
	0.147	2.13646
	0.148	2.1001
	0.149	2.06328
	0.15	2.02361
	0.151	1.98421
	0.152	1.94375
	0.153	1.90525
	0.154	1.86765
	0.155	1.83007
	0.156	1.79088
	0.157	1.75063
	0.158	1.71154
	0.159	1.67559
	0.16	1.63841
	0.161	1.6009
	0.162	1.56407
	0.163	1.53001
	0.164	1.49819
	0.165	1.46768
	0.167	1.43615
	0.168	1.40238
	0.169	1.36842
	0.17	1.33554
	0.171	1.30332
	0.172	1.27035
	0.173	1.23587
	0.174	1.20165
	0.175	1.16979
	0.176	1.141
	0.177	1.11286
	0.178	1.08457
	0.179	1.05736
	0.18	1.03111
	0.181	1.00583
	0.182	0.982338
	0.183	0.959588
	0.184	0.934587
	0.185	0.911406
	0.186	0.890439
	0.187	0.871251
	0.188	0.85288
	0.189	0.833535
	0.19	0.814082
	0.191	0.79258
	0.192	0.772107
	0.193	0.753452
	0.194	0.735516
	0.195	0.718435
	0.196	0.701316
	0.197	0.685656
	0.198	0.67139
	0.199	0.657501
	0.2	0.643956
	0.201	0.631771
	0.202	0.620562
	0.203	0.608213
	0.204	0.595106
	0.205	0.582405
	0.206	0.572506
	0.207	0.563801
	0.208	0.555798
	0.209	0.54812
	0.21	0.541195
	0.211	0.534181
	0.213	0.528366
	0.214	0.524039
	0.215	0.519023
	0.216	0.514204
	0.217	0.509717
	0.218	0.506213
	0.219	0.503561
	0.22	0.500697
	0.221	0.498434
	0.222	0.496963
	0.223	0.49648
	0.224	0.496241
	0.225	0.49587
	0.226	0.49666
	0.227	0.497074
	0.228	0.498236
	0.229	0.500435
	0.23	0.501799
	0.231	0.504237
	0.232	0.507583
	0.233	0.511486
	0.234	0.515486
	0.235	0.518832
	0.236	0.523081
	0.237	0.527451
	0.238	0.530522
	0.239	0.53415
	0.24	0.538705
	0.241	0.54437
	0.242	0.549525
	0.243	0.553442
	0.244	0.558374
	0.245	0.564709
	0.246	0.571574
	0.247	0.57777
	0.248	0.584011
	0.249	0.590431
	0.25	0.595957
	0.251	0.600619
	0.252	0.605839
	0.253	0.611627
	0.254	0.617562
	0.255	0.622682
	0.256	0.626718
	0.258	0.631159
	0.259	0.635761
	0.26	0.64031
	0.261	0.645058
	0.262	0.649054
	0.263	0.651934
	0.264	0.654521
	0.265	0.658035
	0.266	0.661031
	0.267	0.66403
	0.268	0.666987
	0.269	0.669335
	0.27	0.670841
	0.271	0.673009
	0.272	0.675126
	0.273	0.676176
	0.274	0.676579
	0.275	0.677317
	0.276	0.678195
	0.277	0.679883
	0.278	0.680155
	0.279	0.680141
	0.28	0.682061
	0.281	0.681033
	0.282	0.680029
	0.283	0.677912
	0.284	0.675969
	0.285	0.674087
	0.286	0.672269
	0.287	0.670447
	0.288	0.670117
	0.289	0.669304
	0.29	0.667785
	0.291	0.665539
	0.292	0.664664
	0.293	0.663322
	0.294	0.661977
	0.295	0.6596
	0.296	0.656787
	0.297	0.6536
	0.298	0.650027
	0.299	0.646153
	0.3	0.642561
	0.301	0.639919
	0.302	0.637471
	0.304	0.635106
	0.305	0.632726
	0.306	0.630396
	0.307	0.628041
	0.308	0.624919
	0.309	0.621752
	0.31	0.618638
	0.311	0.615456
	0.312	0.61236
	0.313	0.609854
	0.314	0.608539
	0.315	0.606902
	0.316	0.603733
	0.317	0.601112
	0.318	0.597793
	0.319	0.59529
	0.32	0.593462
	0.321	0.590339
	0.322	0.587409
	0.323	0.585047
	0.324	0.583407
	0.325	0.580958
	0.326	0.579075
	0.327	0.575627
	0.328	0.573002
	0.329	0.570567
	0.33	0.56829
	0.331	0.565636
	0.332	0.564332
	0.333	0.562827
	0.334	0.561538
	0.335	0.560229
	0.336	0.559671
	0.337	0.558023
	0.338	0.555442
	0.339	0.553134
	0.34	0.5506
	0.341	0.549172
	0.342	0.546776
	0.343	0.544941
	0.344	0.542437
	0.345	0.54028
	0.346	0.538406
	0.347	0.537149
	0.349	0.535716
	0.35	0.534403
	0.351	0.533472
	0.352	0.531756
	0.353	0.529411
	0.354	0.526579
	0.355	0.523811
	0.356	0.520933
	0.357	0.51876
	0.358	0.517024
	0.359	0.514834
	0.36	0.512742
	0.361	0.510732
	0.362	0.508651
	0.363	0.506312
	0.364	0.503254
	0.365	0.500857
	0.366	0.500519
	0.367	0.499014
	0.368	0.497658
	0.369	0.495834
	0.37	0.493711
	0.371	0.491226
	0.372	0.489909
	0.373	0.487784
	0.374	0.485122
	0.375	0.483376
	0.376	0.481567
	0.377	0.48089
	0.378	0.479697
	0.379	0.478091
	0.38	0.475615
	0.381	0.474968
	0.382	0.473639
	0.383	0.471826
	0.384	0.469714
	0.385	0.467742
	0.386	0.465735
	0.387	0.464693
	0.388	0.462738
	0.389	0.460985
	0.39	0.459192
	0.391	0.456677
	0.392	0.454495
	0.393	0.453076
	0.395	0.451119
	0.396	0.448906
	0.397	0.446762
	0.398	0.444521
	0.399	0.442383
	0.4	0.440111
	0.401	0.437662
	0.402	0.436251
	0.403	0.435092
	0.404	0.433849
	0.405	0.432716
	0.406	0.432269
	0.407	0.431771
	0.408	0.430244
	0.409	0.429162
	0.41	0.428068
	0.411	0.426775
	0.412	0.426499
	0.413	0.425994
	0.414	0.42507
	0.415	0.423165
	0.416	0.421066
	0.417	0.418529
	0.418	0.417025
	0.419	0.416174
	0.42	0.415076
	0.421	0.413823
	0.422	0.412273
	0.423	0.411211
	0.424	0.409567
	0.425	0.407227
	0.426	0.405397
	0.427	0.403921
	0.428	0.402487
	0.429	0.400688
	0.43	0.399488
	0.431	0.39774
	0.432	0.395932
	0.433	0.394191
	0.434	0.392676
	0.435	0.390874
	0.436	0.388545
	0.437	0.386663
	0.438	0.385376
	0.44	0.384303
	0.441	0.383626
	0.442	0.382321
	0.443	0.380695
	0.444	0.379601
	0.445	0.378513
	0.446	0.376847
	0.447	0.37543
	0.448	0.373708
	0.449	0.371908
	0.45	0.37089
	0.451	0.36966
	0.452	0.367701
	0.453	0.365784
	0.454	0.364126
	0.455	0.363154
	0.456	0.361927
	0.457	0.359634
	0.458	0.358496
	0.459	0.356512
	0.46	0.35443
	0.461	0.352703
	0.462	0.349264
	0.463	0.346588
	0.464	0.344663
	0.465	0.34296
	0.466	0.340848
	0.467	0.340108
	0.468	0.338813
	0.469	0.336719
	0.47	0.334235
	0.471	0.332614
	0.472	0.330376
	0.473	0.32786
	0.474	0.326589
	0.475	0.326047
	0.476	0.32423
	0.477	0.32235
	0.478	0.320933
	0.479	0.319575
	0.48	0.318415
	0.481	0.317169
	0.482	0.316019
	0.483	0.314829
	0.484	0.312874
	0.486	0.310736
	0.487	0.308913
	0.488	0.307689
	0.489	0.306375
	0.49	0.304126
	0.491	0.301385
	0.492	0.299985
	0.493	0.299328
	0.494	0.297697
	0.495	0.296423
	0.496	0.29583
	0.497	0.294756
	0.498	0.293901
	0.499	0.292699
	0.5	0.291025
	0.501	0.289435
	0.502	0.288539
	0.503	0.287881
	0.504	0.286299
	0.505	0.284591
	0.506	0.283418
	0.507	0.282435
	0.508	0.28197
	0.509	0.281206
	0.51	0.280848
	0.511	0.279653
	0.512	0.280221
	0.513	0.280292
	0.514	0.279253
	0.515	0.278764
	0.516	0.278776
	0.517	0.277921
	0.518	0.276796
	0.519	0.275815
	0.52	0.275213
	0.521	0.274649
	0.522	0.274321
	0.523	0.274014
	0.524	0.273087
	0.525	0.271706
	0.526	0.27052
	0.527	0.269049
	0.528	0.267388
	0.529	0.265897
	0.531	0.264239
	0.532	0.261851
	0.533	0.259941
	0.534	0.259415
	0.535	0.259085
	0.536	0.258482
	0.537	0.257265
	0.538	0.255808
	0.539	0.255702
	0.54	0.25614
	0.541	0.256152
	0.542	0.255891
	0.543	0.254866
	0.544	0.254637
	0.545	0.254583
	0.546	0.252531
	0.547	0.251669
	0.548	0.251554
	0.549	0.250393
	0.55	0.249546
	0.551	0.248694
	0.552	0.246634
	0.553	0.24502
	0.554	0.244657
	0.555	0.244146
	0.556	0.242985
	0.557	0.241835
	0.558	0.239694
	0.559	0.238162
	0.56	0.237131
	0.561	0.235802
	0.562	0.235019
	0.563	0.232962
	0.564	0.23214
	0.565	0.230347
	0.566	0.229241
	0.567	0.228432
	0.568	0.227545
	0.569	0.226786
	0.57	0.225901
	0.571	0.224611
	0.572	0.223717
	0.573	0.222724
	0.574	0.222085
	0.575	0.221619
	0.577	0.221312
	0.578	0.221135
	0.579	0.220693
	0.58	0.219502
	0.581	0.218666
	0.582	0.218538
	0.583	0.217736
	0.584	0.216131
	0.585	0.215165
	0.586	0.214441
	0.587	0.214538
	0.588	0.214406
	0.589	0.213045
	0.59	0.211725
	0.591	0.210563
	0.592	0.208625
	0.593	0.207449
	0.594	0.205369
	0.595	0.203813
	0.596	0.203098
	0.597	0.201954
	0.598	0.19983
	0.599	0.19858
	0.6	0.197549
	0.601	0.195817
	0.602	0.195553
	0.603	0.194787
	0.604	0.194023
	0.605	0.192158
	0.606	0.190149
	0.607	0.189193
	0.608	0.187867
	0.609	0.187299
	0.61	0.185547
	0.611	0.184314
	0.612	0.182747
	0.613	0.18245
	0.614	0.180985
	0.615	0.180049
	0.616	0.178113
	0.617	0.176448
	0.618	0.175095
	0.619	0.173733
	0.62	0.172552
	0.622	0.171401
	0.623	0.170235
	0.624	0.169262
	0.625	0.16801
	0.626	0.166639
	0.627	0.164567
	0.628	0.162417
	0.629	0.162008
	0.63	0.162189
	0.631	0.161511
	0.632	0.160623
	0.633	0.160108
	0.634	0.159929
	0.635	0.159733
	0.636	0.158794
	0.637	0.156648
	0.638	0.154876
	0.639	0.153411
	0.64	0.151041
	0.641	0.151158
	0.642	0.151559
	0.643	0.15062
	0.644	0.149604
	0.645	0.148921
	0.646	0.148238
	0.647	0.146765
	0.648	0.145552
	0.649	0.144849
	0.65	0.143375
	0.651	0.142444
	0.652	0.141673
	0.653	0.14058
	0.654	0.138574
	0.655	0.13779
	0.656	0.137209
	0.657	0.136484
	0.658	0.136216
	0.659	0.135094
	0.66	0.134369
	0.661	0.133644
	0.662	0.132612
	0.663	0.131653
	0.664	0.130764
	0.665	0.130263
	0.666	0.129664
	0.668	0.128979
	0.669	0.12838
	0.67	0.127961
	0.671	0.127166
	0.672	0.125987
	0.673	0.124433
	0.674	0.123149
	0.675	0.12221
	0.676	0.121579
	0.677	0.121121
	0.678	0.120265
	0.679	0.118438
	0.68	0.116506
	0.681	0.11545
	0.682	0.114153
	0.683	0.111982
	0.684	0.110322
	0.685	0.108334
	0.686	0.107207
	0.687	0.106831
	0.688	0.105372
	0.689	0.10444
	0.69	0.10402
	0.691	0.101003
	0.692	0.0987709
	0.693	0.0977683
	0.694	0.0979594
	0.695	0.0963272
	0.696	0.0956396
	0.697	0.0955056
	0.698	0.0944132
	0.699	0.0928814
	0.7	0.0920007
	0.701	0.0917664
	0.702	0.0907623
	0.703	0.0898194
	0.704	0.0890568
	0.705	0.0879665
	0.706	0.0870862
	0.707	0.0859989
	0.708	0.0847966
	0.709	0.0839115
	0.71	0.0828108
	0.711	0.0817225
	0.713	0.0804344
	0.714	0.0793043
	0.715	0.0787019
	0.716	0.0775103
	0.717	0.0766229
	0.718	0.0754557
	0.719	0.0742097
	0.72	0.0733057
	0.721	0.07271
	0.722	0.0729475
	0.723	0.0727551
	0.724	0.0715191
	0.725	0.0698394
	0.726	0.0681591
	0.727	0.0676141
	0.728	0.0670005
	0.729	0.0655978
	0.73	0.0652068
	0.731	0.0639168
	0.732	0.062752
	0.733	0.062421
	0.734	0.0615648
	0.735	0.0609078
	0.736	0.0604446
	0.737	0.0600998
	0.738	0.0598353
	0.739	0.0587362
	0.74	0.0584317
	0.741	0.058938
	0.742	0.0581503
	0.743	0.0567372
	0.744	0.0545822
	0.745	0.05412
	0.746	0.0526235
	0.747	0.0519615
	0.748	0.0523017
	0.749	0.0530644
	0.75	0.053062
	0.751	0.0523508
	0.752	0.0512001
	0.753	0.0500577
	0.754	0.0494463
	0.755	0.0481751
	0.756	0.0468106
	0.757	0.0462644
	0.759	0.0453547
	0.76	0.0439438
	0.761	0.0425947
	0.762	0.0414921
	0.763	0.040693
	0.764	0.0396957
	0.765	0.0384212
	0.766	0.0374113
	0.767	0.0368977
	0.768	0.0366816
	0.769	0.0356266
	0.77	0.034394
	0.771	0.0334187
	0.772	0.0319805
	0.773	0.0314024
	0.774	0.0314306
	0.775	0.0313426
	0.776	0.0310147
	0.777	0.030372
	0.778	0.0298941
	0.779	0.0295044
	0.78	0.0285923
	0.781	0.0280803
	0.782	0.028156
	0.783	0.0279188
	0.784	0.0268648
	0.785	0.025557
	0.786	0.0243404
	0.787	0.0227387
	0.788	0.0220901
	0.789	0.0213089
	0.79	0.0202879
	0.791	0.0189921
	0.792	0.0185141
	0.793	0.0188295
	0.794	0.018809
	0.795	0.0180524
	0.796	0.0181477
	0.797	0.0176222
	0.798	0.0164942
	0.799	0.0153537
	0.8	0.0149499
	0.801	0.0140722
	0.802	0.0139372
	0.804	0.0142546
	0.805	0.0141245
	0.806	0.0144422
	0.807	0.0144402
	0.808	0.0137657
	0.809	0.0133373
	0.81	0.0135444
	0.811	0.0134285
	0.812	0.0139075
	0.813	0.0143454
	0.814	0.013886
	0.815	0.0134387
	0.816	0.0124654
	0.817	0.0118782
	0.818	0.0112432
	0.819	0.010882
	0.82	0.0105836
	0.821	0.00969531
	0.822	0.00822097
	0.823	0.00676574
	0.824	0.00614495
	0.825	0.00560755
	0.826	0.00438403
	0.827	0.0034077
	0.828	0.00281089
	0.829	0.00244343
	0.83	0.00165635
	0.831	0.00094156
	0.832	-0.0003076
	0.833	-0.0007296
	0.834	-0.0004522
	0.835	0.00024542
	0.836	1.05e-05
	0.837	0.00042126
	0.838	-0.0009379
	0.839	-0.0020851
	0.84	-0.00395
	0.841	-0.0049937
	0.842	-0.0055284
	0.843	-0.0060516
	0.844	-0.0065791
	0.845	-0.0070248
	0.846	-0.0077005
	0.847	-0.0084864
	0.848	-0.0085718
	0.85	-0.008698
	0.851	-0.0093816
	0.852	-0.0099529
	0.853	-0.0110688
	0.854	-0.0120576
	0.855	-0.0127082
	0.856	-0.0137092
	0.857	-0.0146805
	0.858	-0.0155865
	0.859	-0.0163451
	0.86	-0.0168795
	0.861	-0.0166885
	0.862	-0.0177552
	0.863	-0.0182237
	0.864	-0.0191441
	0.865	-0.0202408
	0.866	-0.0195607
	0.867	-0.021188
	0.868	-0.0224736
	0.869	-0.0229098
	0.87	-0.0236252
	0.871	-0.0239835
	0.872	-0.0242062
	0.873	-0.0254223
	0.874	-0.0265157
	0.875	-0.0269495
	0.876	-0.0273861
	0.877	-0.0283595
	0.878	-0.0298617
	0.879	-0.0311576
	0.88	-0.0317338
	0.881	-0.0326909
	0.882	-0.033485
	0.883	-0.0348202
	0.884	-0.0359765
	0.885	-0.0375827
	0.886	-0.0389181
	0.887	-0.0403663
	0.888	-0.0413133
	0.889	-0.041148
	0.89	-0.0410995
	0.891	-0.0423161
	0.892	-0.0438083
	0.893	-0.0457896
	0.895	-0.0470864
	0.896	-0.0482351
	0.897	-0.0498359
	0.898	-0.0513196
	0.899	-0.0528473
	0.9	-0.0542496
	0.901	-0.0560373
	0.902	-0.0571556
	0.903	-0.0585294
	0.904	-0.0598105
	0.905	-0.0609925
	0.906	-0.0621336
	0.907	-0.063007
	0.908	-0.0648598
	0.909	-0.0655149
	0.91	-0.0668908
	0.911	-0.068301
	0.912	-0.0695358
	0.913	-0.0711615
	0.914	-0.0716106
	0.915	-0.0724296
	0.916	-0.0740809
	0.917	-0.0756148
	0.918	-0.0756563
	0.919	-0.0771035
	0.92	-0.0783182
	0.921	-0.0795284
	0.922	-0.0812067
	0.923	-0.0815006
	0.924	-0.0826636
	0.925	-0.0841527
	0.926	-0.0853465
	0.927	-0.0863409
	0.928	-0.0876812
	0.929	-0.0886848
	0.93	-0.0899376
	0.931	-0.0905594
	0.932	-0.0914967
	0.933	-0.0923598
	0.934	-0.0928667
	0.935	-0.0933151
	0.936	-0.0938322
	0.937	-0.0942755
	0.938	-0.0949525
	0.939	-0.096727
	0.941	-0.0976835
	0.942	-0.0981105
	0.943	-0.0990286
	0.944	-0.099574
	0.945	-0.100169
	0.946	-0.100777
	0.947	-0.101507
	0.948	-0.102098
	0.949	-0.102954
	0.95	-0.103387
	0.951	-0.103523
	0.952	-0.104072
	0.953	-0.103655
	0.954	-0.104893
	0.955	-0.106313
	0.956	-0.107273
	0.957	-0.108009
	0.958	-0.107774
	0.959	-0.108664
	0.96	-0.109949
	0.961	-0.110695
	0.962	-0.110854
	0.963	-0.112367
	0.964	-0.113229
	0.965	-0.113298
	0.966	-0.114699
	0.967	-0.114662
	0.968	-0.116467
	0.969	-0.1176
	0.97	-0.119048
	0.971	-0.119225
	0.972	-0.119429
	0.973	-0.120293
	0.974	-0.121073
	0.975	-0.121279
	0.976	-0.121038
	0.977	-0.121592
	0.978	-0.121734
	0.979	-0.122598
	0.98	-0.123622
	0.981	-0.124412
	0.982	-0.124755
	0.983	-0.125237
	0.984	-0.126419
	0.986	-0.128029
	0.987	-0.129364
	0.988	-0.130703
	0.989	-0.131106
	0.99	-0.131347
	0.991	-0.131995
	0.992	-0.132647
	0.993	-0.133161
	0.994	-0.133524
	0.995	-0.134139
	0.996	-0.135013
	0.997	-0.136126
	0.998	-0.137353
	0.999	-0.139092
	1	-0.140706
	1.001	-0.141853
	1.002	-0.142875
	1.003	-0.144008
	1.004	-0.144171
	1.005	-0.144387
	1.006	-0.14517
	1.007	-0.146012
	1.008	-0.147101
	1.009	-0.147247
	1.01	-0.146773
	1.011	-0.147291
	1.012	-0.148457
	1.013	-0.148428
	1.014	-0.149639
	1.015	-0.150454
	1.016	-0.150176
	1.017	-0.150197
	1.018	-0.151065
	1.019	-0.151364
	1.02	-0.150936
	1.021	-0.152029
	1.022	-0.153057
	1.023	-0.153832
	1.024	-0.154714
	1.025	-0.156249
	1.026	-0.157415
	1.027	-0.15786
	1.028	-0.158145
	1.029	-0.15836
	1.03	-0.159173
	1.032	-0.16077
	1.033	-0.162048
	1.034	-0.162641
	1.035	-0.163174
	1.036	-0.164033
	1.037	-0.165344
	1.038	-0.166644
	1.039	-0.167663
	1.04	-0.168415
	1.041	-0.168291
	1.042	-0.168294
	1.043	-0.16893
	1.044	-0.170305
	1.045	-0.171135
	1.046	-0.172367
	1.047	-0.172688
	1.048	-0.173886
	1.049	-0.173287
	1.05	-0.173711
	1.051	-0.17362
	1.052	-0.174798
	1.053	-0.176522
	1.054	-0.177402
	1.055	-0.177964
	1.056	-0.178343
	1.057	-0.17962
	1.058	-0.180427
	1.059	-0.182209
	1.06	-0.184157
	1.061	-0.18503
	1.062	-0.18595
	1.063	-0.187787
	1.064	-0.18861
	1.065	-0.189619
	1.066	-0.191068
	1.067	-0.192164
	1.068	-0.192691
	1.069	-0.193859
	1.07	-0.195701
	1.071	-0.196256
	1.072	-0.1965
	1.073	-0.197439
	1.074	-0.198251
	1.075	-0.198874
	1.076	-0.200405
	1.078	-0.202147
	1.079	-0.20364
	1.08	-0.204915
	1.081	-0.205043
	1.082	-0.20543
	1.083	-0.20694
	1.084	-0.208697
	1.085	-0.209666
	1.086	-0.210161
	1.087	-0.210503
	1.088	-0.21187
	1.089	-0.213316
	1.09	-0.214206
	1.091	-0.216632
	1.092	-0.217927
	1.093	-0.218917
	1.094	-0.21974
	1.095	-0.220362
	1.096	-0.219946
	1.097	-0.219906
	1.098	-0.220345
	1.099	-0.221749
	1.1	-0.224
	1.101	-0.226099
	1.102	-0.226315
	1.103	-0.226782
	1.104	-0.227691
	1.105	-0.228469
	1.106	-0.228632
	1.107	-0.229456
	1.108	-0.229949
	1.109	-0.231006
	1.11	-0.232242
	1.111	-0.232936
	1.112	-0.233441
	1.113	-0.233257
	1.114	-0.233927
	1.115	-0.234608
	1.116	-0.23557
	1.117	-0.237089
	1.118	-0.23799
	1.119	-0.23796
	1.12	-0.238012
	1.121	-0.238525
	1.123	-0.239013
	1.124	-0.239048
	1.125	-0.239256
	1.126	-0.239663
	1.127	-0.239319
	1.128	-0.239339
	1.129	-0.240136
	1.13	-0.241307
	1.131	-0.241964
	1.132	-0.242211
	1.133	-0.241542
	1.134	-0.242022
	1.135	-0.243272
	1.136	-0.243416
	1.137	-0.243806
	1.138	-0.243371
	1.139	-0.243743
	1.14	-0.244146
	1.141	-0.244432
	1.142	-0.245913
	1.143	-0.245795
	1.144	-0.246182
	1.145	-0.247341
	1.146	-0.24953
	1.147	-0.250744
	1.148	-0.250771
	1.149	-0.251603
	1.15	-0.251022
	1.151	-0.250849
	1.152	-0.251882
	1.153	-0.251836
	1.154	-0.251868
	1.155	-0.252373
	1.156	-0.253738
	1.157	-0.254479
	1.158	-0.255314
	1.159	-0.25646
	1.16	-0.256478
	1.161	-0.25716
	1.162	-0.258143
	1.163	-0.25909
	1.164	-0.259865
	1.165	-0.260787
	1.166	-0.261784
	1.167	-0.261858
	1.169	-0.262386
	1.17	-0.263778
	1.171	-0.264848
	1.172	-0.266213
	1.173	-0.267476
	1.174	-0.26868
	1.175	-0.26958
	1.176	-0.270923
	1.177	-0.272015
	1.178	-0.273018
	1.179	-0.273195
	1.18	-0.273585
	1.181	-0.274523
	1.182	-0.275505
	1.183	-0.276803
	1.184	-0.278041
	1.185	-0.278381
	1.186	-0.278839
	1.187	-0.279678
	1.188	-0.280759
	1.189	-0.280236
	1.19	-0.281068
	1.191	-0.281353
	1.192	-0.281459
	1.193	-0.282591
	1.194	-0.283139
	1.195	-0.283911
	1.196	-0.283986
	1.197	-0.284569
	1.198	-0.285616
	1.199	-0.285792
	1.2	-0.286145
	1.201	-0.287039
	1.202	-0.287666
	1.203	-0.288856
	1.204	-0.29005
	1.205	-0.29153
	1.206	-0.291703
	1.207	-0.292195
	1.208	-0.293276
	1.209	-0.292369
	1.21	-0.292589
	1.211	-0.294098
	1.212	-0.295245
	1.214	-0.295974
	1.215	-0.296345
	1.216	-0.296742
	1.217	-0.296634
	1.218	-0.296961
	1.219	-0.297631
	1.22	-0.297978
	1.221	-0.298253
	1.222	-0.299056
	1.223	-0.299703
	1.224	-0.300863
	1.225	-0.30175
	1.226	-0.30155
	1.227	-0.301903
	1.228	-0.302727
	1.229	-0.303408
	1.23	-0.303835
	1.231	-0.304037
	1.232	-0.305176
	1.233	-0.306292
	1.234	-0.306425
	1.235	-0.307459
	1.236	-0.308744
	1.237	-0.309606
	1.238	-0.310184
	1.239	-0.311822
	1.24	-0.312369
	1.241	-0.313648
	1.242	-0.315061
	1.243	-0.315514
	1.244	-0.316354
	1.245	-0.316827
	1.246	-0.317115
	1.247	-0.317791
	1.248	-0.318294
	1.249	-0.319834
	1.25	-0.32047
	1.251	-0.321178
	1.252	-0.322021
	1.253	-0.323142
	1.254	-0.324332
	1.255	-0.324801
	1.256	-0.325459
	1.257	-0.325387
	1.258	-0.325867
	1.26	-0.328039
	1.261	-0.329497
	1.262	-0.329411
	1.263	-0.329157
	1.264	-0.329099
	1.265	-0.329236
	1.266	-0.33
	1.267	-0.331003
	1.268	-0.332161
	1.269	-0.333002
	1.27	-0.333816
	1.271	-0.334754
	1.272	-0.334831
	1.273	-0.336062
	1.274	-0.336299
	1.275	-0.336913
	1.276	-0.338099
	1.277	-0.338397
	1.278	-0.339367
	1.279	-0.339877
	1.28	-0.34086
	1.281	-0.341995
	1.282	-0.341484
	1.283	-0.341924
	1.284	-0.343279
	1.285	-0.342556
	1.286	-0.34315
	1.287	-0.343034
	1.288	-0.343566
	1.289	-0.344535
	1.29	-0.345708
	1.291	-0.346376
	1.292	-0.346896
	1.293	-0.347932
	1.294	-0.348303
	1.295	-0.348533
	1.296	-0.349454
	1.297	-0.350581
	1.298	-0.351248
	1.299	-0.351771
	1.3	-0.353198
	1.301	-0.353585
	1.302	-0.353566
	1.303	-0.353611
	1.305	-0.353104
	1.306	-0.353156
	1.307	-0.35443
	1.308	-0.356207
	1.309	-0.357229
	1.31	-0.35767
	1.311	-0.358235
	1.312	-0.359521
	1.313	-0.361008
	1.314	-0.362615
	1.315	-0.364265
	1.316	-0.365283
	1.317	-0.366361
	1.318	-0.367307
	1.319	-0.368141
	1.32	-0.368472
	1.321	-0.368712
	1.322	-0.369449
	1.323	-0.368792
	1.324	-0.369207
	1.325	-0.370544
	1.326	-0.37222
	1.327	-0.373672
	1.328	-0.373136
	1.329	-0.373351
	1.33	-0.373249
	1.331	-0.373016
	1.332	-0.373504
	1.333	-0.373948
	1.334	-0.373468
	1.335	-0.375188
	1.336	-0.375926
	1.337	-0.376823
	1.338	-0.377329
	1.339	-0.378079
	1.34	-0.378118
	1.341	-0.378115
	1.342	-0.378538
	1.343	-0.378781
	1.344	-0.379807
	1.345	-0.380641
	1.346	-0.38105
	1.347	-0.381243
	1.348	-0.38173
	1.349	-0.381796
	1.351	-0.38174
	1.352	-0.382628
	1.353	-0.384125
	1.354	-0.385505
	1.355	-0.386858
	1.356	-0.387652
	1.357	-0.388181
	1.358	-0.388525
	1.359	-0.388785
	1.36	-0.389495
	1.361	-0.390481
	1.362	-0.391101
	1.363	-0.391377
	1.364	-0.391686
	1.365	-0.391253
	1.366	-0.391411
	1.367	-0.391719
	1.368	-0.391747
	1.369	-0.391996
	1.37	-0.392995
	1.371	-0.393989
	1.372	-0.394824
	1.373	-0.395756
	1.374	-0.39627
	1.375	-0.396751
	1.376	-0.396852
	1.377	-0.396745
	1.378	-0.397931
	1.379	-0.398107
	1.38	-0.39787
	1.381	-0.39975
	1.382	-0.400773
	1.383	-0.40204
	1.384	-0.402549
	1.385	-0.402803
	1.386	-0.403175
	1.387	-0.404276
	1.388	-0.404504
	1.389	-0.404654
	1.39	-0.405313
	1.391	-0.405212
	1.392	-0.405776
	1.393	-0.406793
	1.394	-0.407276
	1.396	-0.407755
	1.397	-0.408432
	1.398	-0.409592
	1.399	-0.410706
	1.4	-0.412517
	1.401	-0.413779
	1.402	-0.41432
	1.403	-0.414566
	1.404	-0.414504
	1.405	-0.414942
	1.406	-0.415911
	1.407	-0.416599
	1.408	-0.417445
	1.409	-0.417968
	1.41	-0.417687
	1.411	-0.417683
	1.412	-0.417759
	1.413	-0.418353
	1.414	-0.418991
	1.415	-0.420696
	1.416	-0.421821
	1.417	-0.422918
	1.418	-0.423004
	1.419	-0.423581
	1.42	-0.424914
	1.421	-0.426012
	1.422	-0.427089
	1.423	-0.427287
	1.424	-0.428248
	1.425	-0.428277
	1.426	-0.428748
	1.427	-0.430324
	1.428	-0.430681
	1.429	-0.432372
	1.43	-0.433693
	1.431	-0.433513
	1.432	-0.433765
	1.433	-0.433722
	1.434	-0.434656
	1.435	-0.435814
	1.436	-0.436635
	1.437	-0.436906
	1.438	-0.437587
	1.439	-0.437781
	1.44	-0.43854
	1.442	-0.439765
	1.443	-0.441233
	1.444	-0.441981
	1.445	-0.443125
	1.446	-0.444525
	1.447	-0.445468
	1.448	-0.446135
	1.449	-0.446882
	1.45	-0.446245
	1.451	-0.446497
	1.452	-0.447042
	1.453	-0.447439
	1.454	-0.448523
	1.455	-0.4497
	1.456	-0.449445
	1.457	-0.449685
	1.458	-0.449738
	1.459	-0.450217
	1.46	-0.451472
	1.461	-0.452625
	1.462	-0.454263
	1.463	-0.454697
	1.464	-0.455388
	1.465	-0.455519
	1.466	-0.455282
	1.467	-0.455779
	1.468	-0.457159
	1.469	-0.45728
	1.47	-0.456663
	1.471	-0.456794
	1.472	-0.456422
	1.473	-0.456533
	1.474	-0.456446
	1.475	-0.456764
	1.476	-0.4569
	1.477	-0.457078
	1.478	-0.457775
	1.479	-0.458998
	1.48	-0.45998
	1.481	-0.461076
	1.482	-0.461725
	1.483	-0.462733
	1.484	-0.463371
	1.485	-0.463118
	1.487	-0.463288
	1.488	-0.463455
	1.489	-0.463871
	1.49	-0.464664
	1.491	-0.465149
	1.492	-0.465585
	1.493	-0.46514
	1.494	-0.465335
	1.495	-0.465438
	1.496	-0.465594
	1.497	-0.466127
	1.498	-0.46633
	1.499	-0.466719
	1.5	-0.467915
	1.501	-0.469463
	1.502	-0.470918
	1.503	-0.471585
	1.504	-0.472665
	1.505	-0.472984
	1.506	-0.473879
	1.507	-0.474215
	1.508	-0.474237
	1.509	-0.474512
	1.51	-0.474461
	1.511	-0.473872
	1.512	-0.473525
	1.513	-0.47448
	1.514	-0.474553
	1.515	-0.475182
	1.516	-0.4762
	1.517	-0.476541
	1.518	-0.476716
	1.519	-0.476698
	1.52	-0.477367
	1.521	-0.477293
	1.522	-0.478162
	1.523	-0.479356
	1.524	-0.480712
	1.525	-0.481235
	1.526	-0.481415
	1.527	-0.481806
	1.528	-0.482495
	1.529	-0.482429
	1.53	-0.483087
	1.531	-0.484228
	1.533	-0.484567
	1.534	-0.48465
	1.535	-0.485021
	1.536	-0.485656
	1.537	-0.486491
	1.538	-0.487449
	1.539	-0.488198
	1.54	-0.4889
	1.541	-0.489847
	1.542	-0.490012
	1.543	-0.490356
	1.544	-0.491059
	1.545	-0.491638
	1.546	-0.492637
	1.547	-0.493315
	1.548	-0.494037
	1.549	-0.493723
	1.55	-0.493986
	1.551	-0.495081
	1.552	-0.493958
	1.553	-0.49525
	1.554	-0.495078
	1.555	-0.494601
	1.556	-0.495485
	1.557	-0.496219
	1.558	-0.496807
	1.559	-0.497147
	1.56	-0.498717
	1.561	-0.500147
	1.562	-0.501462
	1.563	-0.502398
	1.564	-0.503412
	1.565	-0.504164
	1.566	-0.50463
	1.567	-0.505175
	1.568	-0.506213
	1.569	-0.507891
	1.57	-0.509252
	1.571	-0.510139
	1.572	-0.510722
	1.573	-0.511094
	1.574	-0.511431
	1.575	-0.51201
	1.576	-0.512614
	1.578	-0.512998
	1.579	-0.512838
	1.58	-0.513144
	1.581	-0.513457
	1.582	-0.51388
	1.583	-0.515194
	1.584	-0.515498
	1.585	-0.516355
	1.586	-0.517148
	1.587	-0.517989
	1.588	-0.518683
	1.589	-0.519541
	1.59	-0.520392
	1.591	-0.521089
	1.592	-0.52202
	1.593	-0.523277
	1.594	-0.524132
	1.595	-0.524794
	1.596	-0.524811
	1.597	-0.525281
	1.598	-0.525726
	1.599	-0.527047
	1.6	-0.52768
	1.601	-0.526732
	1.602	-0.528605
	1.603	-0.528161
	1.604	-0.529236
	1.605	-0.530487
	1.606	-0.531684
	1.607	-0.532868
	1.608	-0.533815
	1.609	-0.535183
	1.61	-0.535808
	1.611	-0.536265
	1.612	-0.536001
	1.613	-0.535919
	1.614	-0.53594
	1.615	-0.535905
	1.616	-0.5366
	1.617	-0.537453
	1.618	-0.538259
	1.619	-0.538796
	1.62	-0.538959
	1.621	-0.539949
	1.622	-0.540986
	1.624	-0.541879
	1.625	-0.542345
	1.626	-0.542857
	1.627	-0.544127
	1.628	-0.545622
	1.629	-0.546937
	1.63	-0.547764
	1.631	-0.548766
	1.632	-0.549489
	1.633	-0.54996
	1.634	-0.550627
	1.635	-0.550634
	1.636	-0.551183
	1.637	-0.551478
	1.638	-0.552678
	1.639	-0.553284
	1.64	-0.553978
	1.641	-0.553884
	1.642	-0.554704
	1.643	-0.555498
	1.644	-0.555808
	1.645	-0.555604
	1.646	-0.556422
	1.647	-0.556418
	1.648	-0.557114
	1.649	-0.557415
	1.65	-0.558165
	1.651	-0.558909
	1.652	-0.558934
	1.653	-0.55956
	1.654	-0.559413
	1.655	-0.559501
	1.656	-0.559276
	1.657	-0.559357
	1.658	-0.559894
	1.659	-0.559849
	1.66	-0.559899
	1.661	-0.561065
	1.662	-0.562361
	1.663	-0.563252
	1.664	-0.564225
	1.665	-0.564806
	1.666	-0.565058
	1.667	-0.565037
	1.669	-0.56402
	1.67	-0.56421
	1.671	-0.565378
	1.672	-0.566431
	1.673	-0.567709
	1.674	-0.569021
	1.675	-0.569605
	1.676	-0.570141
	1.677	-0.569993
	1.678	-0.56945
	1.679	-0.569381
	1.68	-0.570205
	1.681	-0.570557
	1.682	-0.570643
	1.683	-0.5714
	1.684	-0.572808
	1.685	-0.573866
	1.686	-0.574787
	1.687	-0.574701
	1.688	-0.574343
	1.689	-0.574565
	1.69	-0.574842
	1.691	-0.575689
	1.692	-0.575315
	1.693	-0.575422
	1.694	-0.575569
	1.695	-0.576469
	1.696	-0.577307
	1.697	-0.577989
	1.698	-0.579369
	1.699	-0.579661
	1.7	-0.580053
	1.701	-0.580256
	1.702	-0.580876
	1.703	-0.581537
	1.704	-0.582614
	1.705	-0.584047
	1.706	-0.584576
	1.707	-0.584951
	1.708	-0.585101
	1.709	-0.585203
	1.71	-0.5852
	1.711	-0.585042
	1.712	-0.585575
	1.713	-0.585791
	1.715	-0.586005
	1.716	-0.587016
	1.717	-0.587341
	1.718	-0.587289
	1.719	-0.588895
	1.72	-0.589745
	1.721	-0.589013
	1.722	-0.588229
	1.723	-0.587596
	1.724	-0.586982
	1.725	-0.587071
	1.726	-0.587596
	1.727	-0.588655
	1.728	-0.589538
	1.729	-0.590074
	1.73	-0.589781
	1.731	-0.589616
	1.732	-0.590551
	1.733	-0.590917
	1.734	-0.591459
	1.735	-0.592278
	1.736	-0.592141
	1.737	-0.591967
	1.738	-0.592609
	1.739	-0.593301
	1.74	-0.592875
	1.741	-0.592628
	1.742	-0.594253
	1.743	-0.59517
	1.744	-0.595898
	1.745	-0.596178
	1.746	-0.595778
	1.747	-0.59606
	1.748	-0.595698
	1.749	-0.596357
	1.75	-0.596717
	1.751	-0.597206
	1.752	-0.597763
	1.753	-0.598799
	1.754	-0.599586
	1.755	-0.598714
	1.756	-0.598442
	1.757	-0.598887
	1.758	-0.599347
	1.76	-0.599848
	1.761	-0.60035
	1.762	-0.60036
	1.763	-0.599859
	1.764	-0.600038
	1.765	-0.600561
	1.766	-0.600487
	1.767	-0.600869
	1.768	-0.601894
	1.769	-0.602202
	1.77	-0.602507
	1.771	-0.602957
	1.772	-0.603486
	1.773	-0.604729
	1.774	-0.605822
	1.775	-0.607096
	1.776	-0.607388
	1.777	-0.607331
	1.778	-0.608472
	1.779	-0.609573
	1.78	-0.61042
	1.781	-0.611047
	1.782	-0.610528
	1.783	-0.61072
	1.784	-0.610435
	1.785	-0.610652
	1.786	-0.610861
	1.787	-0.612145
	1.788	-0.613102
	1.789	-0.613854
	1.79	-0.614288
	1.791	-0.615148
	1.792	-0.615254
	1.793	-0.615012
	1.794	-0.615675
	1.795	-0.616017
	1.796	-0.617071
	1.797	-0.617674
	1.798	-0.61791
	1.799	-0.618079
	1.8	-0.618281
	1.801	-0.619192
	1.802	-0.619191
	1.803	-0.619038
	1.804	-0.61888
	1.806	-0.619684
	1.807	-0.62022
	1.808	-0.620558
	1.809	-0.621166
	1.81	-0.621849
	1.811	-0.622452
	1.812	-0.622828
	1.813	-0.623039
	1.814	-0.62375
	1.815	-0.624789
	1.816	-0.625652
	1.817	-0.625598
	1.818	-0.625209
	1.819	-0.62534
	1.82	-0.625796
	1.821	-0.626234
	1.822	-0.626161
	1.823	-0.625312
	1.824	-0.625783
	1.825	-0.626404
	1.826	-0.627163
	1.827	-0.627253
	1.828	-0.62705
	1.829	-0.628018
	1.83	-0.628761
	1.831	-0.629818
	1.832	-0.630597
	1.833	-0.630822
	1.834	-0.631299
	1.835	-0.631981
	1.836	-0.633035
	1.837	-0.63387
	1.838	-0.633299
	1.839	-0.632951
	1.84	-0.633139
	1.841	-0.633005
	1.842	-0.633076
	1.843	-0.633102
	1.844	-0.633232
	1.845	-0.634049
	1.846	-0.634159
	1.847	-0.633495
	1.848	-0.63335
	1.849	-0.633998
	1.851	-0.634389
	1.852	-0.634858
	1.853	-0.635539
	1.854	-0.635253
	1.855	-0.635538
	1.856	-0.636248
	1.857	-0.636723
	1.858	-0.636811
	1.859	-0.637234
	1.86	-0.637339
	1.861	-0.636977
	1.862	-0.637226
	1.863	-0.638073
	1.864	-0.639097
	1.865	-0.639055
	1.866	-0.639193
	1.867	-0.640695
	1.868	-0.642184
	1.869	-0.64354
	1.87	-0.643635
	1.871	-0.644718
	1.872	-0.64651
	1.873	-0.647526
	1.874	-0.647631
	1.875	-0.647249
	1.876	-0.647534
	1.877	-0.648372
	1.878	-0.648282
	1.879	-0.647519
	1.88	-0.647151
	1.881	-0.646784
	1.882	-0.647696
	1.883	-0.648479
	1.884	-0.648993
	1.885	-0.649174
	1.886	-0.64899
	1.887	-0.648951
	1.888	-0.649176
	1.889	-0.649882
	1.89	-0.651168
	1.891	-0.652068
	1.892	-0.652737
	1.893	-0.653233
	1.894	-0.653667
	1.895	-0.653183
	1.897	-0.653093
	1.898	-0.654187
	1.899	-0.655138
	1.9	-0.655919
	1.901	-0.656779
	1.902	-0.656958
	1.903	-0.657055
	1.904	-0.658037
	1.905	-0.659024
	1.906	-0.660153
	1.907	-0.661119
	1.908	-0.662428
	1.909	-0.662789
	1.91	-0.663576
	1.911	-0.664717
	1.912	-0.66488
	1.913	-0.665624
	1.914	-0.664639
	1.915	-0.664768
	1.916	-0.665901
	1.917	-0.666525
	1.918	-0.666485
	1.919	-0.665701
	1.92	-0.665934
	1.921	-0.666702
	1.922	-0.665917
	1.923	-0.665937
	1.924	-0.666886
	1.925	-0.667659
	1.926	-0.667958
	1.927	-0.668355
	1.928	-0.668798
	1.929	-0.669959
	1.93	-0.670635
	1.931	-0.671015
	1.932	-0.671223
	1.933	-0.671282
	1.934	-0.67168
	1.935	-0.672061
	1.936	-0.672405
	1.937	-0.67265
	1.938	-0.673144
	1.939	-0.673847
	1.94	-0.67415
	1.942	-0.674506
	1.943	-0.674987
	1.944	-0.675938
	1.945	-0.676678
	1.946	-0.678136
	1.947	-0.680035
	1.948	-0.680946
	1.949	-0.681247
	1.95	-0.681144
	1.951	-0.681451
	1.952	-0.681497
	1.953	-0.681569
	1.954	-0.6818
	1.955	-0.681688
	1.956	-0.681356
	1.957	-0.681531
	1.958	-0.68194
	1.959	-0.682296
	1.96	-0.681965
	1.961	-0.682028
	1.962	-0.682441
	1.963	-0.682626
	1.964	-0.683882
	1.965	-0.684255
	1.966	-0.68376
	1.967	-0.683502
	1.968	-0.684578
	1.969	-0.685011
	1.97	-0.685526
	1.971	-0.685581
	1.972	-0.685881
	1.973	-0.686616
	1.974	-0.686581
	1.975	-0.686809
	1.976	-0.687066
	1.977	-0.687164
	1.978	-0.687604
	1.979	-0.687442
	1.98	-0.687521
	1.981	-0.687191
	1.982	-0.687204
	1.983	-0.687595
	1.984	-0.688082
	1.985	-0.688669
	1.986	-0.689282
	1.988	-0.690317
	1.989	-0.690425
	1.99	-0.690425
	1.991	-0.691067
	1.992	-0.691594
	1.993	-0.691702
	1.994	-0.691716
	1.995	-0.692007
	1.996	-0.691835
	1.997	-0.691485
	1.998	-0.691022
	1.999	-0.691093
	2	-0.691386
	2.001	-0.692142
	2.002	-0.691684
	2.003	-0.693267
	2.004	-0.693619
	2.005	-0.6935
	2.006	-0.694038
	2.007	-0.69402
	2.008	-0.694237
	2.009	-0.694401
	2.01	-0.695979
	2.011	-0.697198
	2.012	-0.698087
	2.013	-0.697708
	2.014	-0.697642
	2.015	-0.697329
	2.016	-0.697384
	2.017	-0.69757
	2.018	-0.69703
	2.019	-0.697466
	2.02	-0.697818
	2.021	-0.697727
	2.022	-0.698251
	2.023	-0.6984
	2.024	-0.698419
	2.025	-0.699064
	2.026	-0.699609
	2.027	-0.699812
	2.028	-0.699988
	2.029	-0.700139
	2.03	-0.701145
	2.031	-0.702101
	2.033	-0.702069
	2.034	-0.701787
	2.035	-0.701306
	2.036	-0.701344
	2.037	-0.701743
	2.038	-0.70214
	2.039	-0.702898
	2.04	-0.703446
	2.041	-0.703284
	2.042	-0.703855
	2.043	-0.704378
	2.044	-0.704556
[truncated: 14,782 more rows]

## Sheet: Supplementary Fig 4a-e
Supplementary Fig 4a
	Voltage (mV)	KCNQ2 WT					10 μM CBD
	-90	0.000155	0.005705	0.001082	0.000528	0.002126	0.001049	0.009642	0.005228	0.000742	0.004497
	-80	0.000401	0.004117	0.001371	1.2e-05	0.004011	0.002816	0.015777	0.004551	0.000863	0.002816
	-70	0.00075	0.013074	0.002752	0.000765	0.005249	0.001046	0.00231	0.018276	0.001832	0.008626
	-60	0.001889	0.019841	0.03082	0.002768	0.017143	0.016608	0.028079	0.107601	0.004695	0.043477
	-50	0.019302	0.03555	0.130659	0.012661	0.068989	0.087361	0.060757	0.249863	0.037745	0.135819
	-40	0.10657	0.091636	0.25768	0.055591	0.165728	0.227606	0.145638	0.373694	0.108835	0.270542
	-30	0.261977	0.179858	0.368615	0.13943	0.314834	0.377201	0.277065	0.477118	0.199669	0.427943
	-20	0.413237	0.289091	0.465322	0.239663	0.417453	0.499907	0.404058	0.556416	0.309785	0.599896
	-10	0.550138	0.391932	0.550378	0.347336	0.557539	0.60708	0.517979	0.639384	0.420987	0.717697
	0	0.657145	0.51884	0.628914	0.455202	0.639974	0.680347	0.630505	0.714815	0.529789	0.844788
	10	0.741547	0.617866	0.688212	0.565248	0.70595	0.741971	0.727769	0.783044	0.618985	0.902508
	20	0.803064	0.738428	0.75032	0.666238	0.751732	0.79865	0.805929	0.84764	0.705556	0.969561
	30	0.857026	0.849266	0.80235	0.751656	0.844776	0.847512	0.860079	0.904427	0.788456	0.976372
	40	0.918306	0.899864	0.862907	0.830546	0.895341	0.890586	0.90187	0.937829	0.844572	0.974114
	50	0.952186	0.946724	0.924445	0.883832	0.933157	0.92814	0.949946	0.954792	0.891952	0.989524
	60	0.986685	0.978769	0.946874	0.94281	0.950971	0.959068	0.985195	0.986803	0.950615	1
	70	1	1	1	1	1	1	1	1	1	0.978487
Supplementary Fig 4b
	Voltage (mV)	F104A					10 μM CBD
	-90	1.2e-05	0.00671	0.003611	0.00066	0.058487	0.002415	0.005083	0.007678	0.00053	0.077687
	-80	0.001652	0.003307	0.010883	0.007031	0.094813	0.006336	0.001075	0.003123	0.009789	0.073353
	-70	0.007241	0.0127	0.01553	0.036339	0.094787	0.000199	0.008056	0.009898	0.054074	0.092077
	-60	0.001035	0.01593	0.020676	0.109111	0.103443	9.72e-05	0.01224	0.016314	0.144199	0.134578
	-50	0.003623	0.029909	0.041766	0.206972	0.172982	-0.00078	0.031933	0.033298	0.25084	0.14995
	-40	0.00958	0.079462	0.103123	0.290647	0.22707	0.004955	0.108061	0.098177	0.344505	0.231113
	-30	0.045112	0.195572	0.242184	0.379634	0.348668	0.053317	0.242182	0.223899	0.433028	0.319626
	-20	0.111337	0.329646	0.377628	0.46143	0.429419	0.151714	0.375729	0.39028	0.506008	0.417683
	-10	0.206584	0.471383	0.512601	0.530621	0.497729	0.276873	0.500547	0.541384	0.590302	0.514285
	0	0.312525	0.59468	0.660241	0.601037	0.601588	0.406368	0.617267	0.661092	0.648446	0.649431
	10	0.42138	0.686718	0.718623	0.68069	0.645491	0.524746	0.712171	0.777583	0.715536	0.70975
	20	0.520164	0.792639	0.820543	0.759045	0.69128	0.623728	0.797293	0.806857	0.773645	0.771218
	30	0.641738	0.859396	0.856919	0.812881	0.760666	0.722052	0.851406	0.853031	0.811608	0.804193
	40	0.740463	0.929136	0.920093	0.864883	0.970667	0.792071	0.909043	0.91241	0.858821	0.861152
	50	0.832349	0.965495	0.941055	0.913173	0.904396	0.859208	0.95343	0.908882	0.904892	0.866782
	60	0.908701	0.998472	0.978024	0.961823	1	0.942611	1	0.959673	0.947507	0.95583
	70	1	1	1	1	0.997646	1	0.98768	1	1	1
Supplementary Fig 4c
	Voltage (mV)	W236A			10 μM CBD
	-90	0.006317	0.019307	0.001976	0.002449	0.015615	0.002336
	-80	0.001194	0.01624	0.001259	0.020233	0.007386	0.024083
	-70	0.027941	0.021302	0.047524	0.093368	0.071468	0.132104
	-60	0.153259	0.110836	0.217173	0.276988	0.203115	0.342792
	-50	0.373874	0.261405	0.443044	0.463291	0.350996	0.505516
	-40	0.556554	0.396352	0.613523	0.592839	0.483346	0.618018
	-30	0.663001	0.516278	0.703479	0.684642	0.580125	0.685159
	-20	0.748728	0.622374	0.774905	0.743446	0.646567	0.744034
	-10	0.795744	0.694341	0.82272	0.778953	0.730487	0.784067
	0	0.852664	0.760041	0.859171	0.836849	0.772752	0.841811
	10	0.898645	0.834786	0.893452	0.867933	0.840768	0.874387
	20	0.934455	0.88384	0.926479	0.895995	0.88162	0.907344
	30	0.968202	0.930078	0.958126	0.938264	0.921603	0.949504
	40	1	0.960092	0.973005	0.972202	1	0.961241
	50	0.987176	1	1	1	0.998811	1
Supplementary Fig 4d
	Voltage (mV)	L272A					10 μM CBD
	-90	0.003395	0.005415	0.006985	0.004419	0.01746	0.000699	0.013524	0.002715	0.00041	0.00963
	-80	0.004215	0.014992	0.009989	0.004621	0.015485	0.002861	0.004837	0.00159	0.007064	0.005476
	-70	0.005321	0.007469	0.014847	0.044469	0.024624	0.006045	0.005997	0.003293	0.000825	0.003292
	-60	0.006666	0.010544	0.010329	0.011069	0.029058	0.007091	0.011102	0.000888	0.016412	0.016582
	-50	0.009681	0.017972	0.013966	0.043478	0.033425	0.0098	0.039488	0.004037	0.087188	0.072341
	-40	0.017639	0.073239	0.026444	0.175822	0.142406	0.04147	0.11331	0.053187	0.235864	0.214396
	-30	0.063364	0.200791	0.136968	0.383083	0.369287	0.153797	0.247712	0.180458	0.40185	0.472107
	-20	0.211616	0.333862	0.309185	0.553899	0.609363	0.33176	0.40678	0.344581	0.551446	0.666805
	-10	0.400375	0.440565	0.443234	0.666654	0.7417	0.511661	0.556922	0.511941	0.660603	0.751922
	0	0.549108	0.583147	0.576331	0.757733	0.816555	0.64831	0.652082	0.654891	0.750506	0.797065
	10	0.650299	0.659571	0.713248	0.823056	0.769936	0.720238	0.702986	0.739141	0.809308	0.864379
	20	0.749477	0.721208	0.774841	0.883015	0.901744	0.79084	0.772546	0.798562	0.85829	0.884894
	30	0.804709	0.777623	0.844961	0.918271	0.917824	0.834159	0.845958	0.861794	0.889047	0.909054
	40	0.865497	0.858579	0.84725	0.95126	0.90858	0.890703	0.900923	0.881843	0.920008	0.939772
	50	0.913694	0.921791	0.889141	0.965965	0.965793	0.930213	0.959803	0.937953	0.949361	0.956712
	60	0.957092	0.964704	0.946265	0.977884	1	0.957618	1	1	0.967663	0.964534
	70	1	1	1	1	0.978952	1	0.992477	0.996149	1	1
Supplementary Fig 4e
	Voltage (mV)	T296A					10 μM CBD
	-90	0.000416	0.004298	0.000321	0.000225	0.000152	0.000124	0.00403	0.001199	0.001056	0.000568
	-80	0.018592	0.006112	0.002741	0.000479	0.001174	0.014067	0.005186	0.001993	0.001168	0.001904
	-70	0.009512	0.009239	0.00375	0.001757	0.004771	-0.00156	0.01318	0.003985	0.005841	0.005857
	-60	0.014192	0.023318	0.012115	0.014082	0.03528	-0.01997	0.07079	0.036188	0.044406	0.034005
	-50	0.02366	0.116464	0.073003	0.076623	0.117095	0.083609	0.219805	0.123469	0.162276	0.104976
	-40	0.159959	0.287421	0.198073	0.177391	0.222181	0.281889	0.392976	0.234598	0.308716	0.212422
	-30	0.427749	0.449476	0.330537	0.296842	0.310361	0.514237	0.54801	0.358349	0.432839	0.332106
	-20	0.628358	0.574816	0.457995	0.411228	0.398441	0.695774	0.650023	0.474611	0.538737	0.448188
	-10	0.755146	0.659144	0.570588	0.52133	0.476758	0.806408	0.724528	0.569171	0.627084	0.542182
	0	0.819358	0.731599	0.666929	0.608311	0.554464	0.824201	0.776424	0.657533	0.7	0.642235
	10	0.847762	0.781577	0.735681	0.686979	0.629688	0.879772	0.815609	0.739017	0.76201	0.727082
	20	0.902699	0.832992	0.800461	0.744109	0.706643	0.902912	0.862501	0.79014	0.804843	0.785023
	30	0.932089	0.872379	0.852086	0.819967	0.777522	0.888125	0.893425	0.841384	0.850741	0.843002
	40	0.937734	0.904178	0.897738	0.881331	0.821766	0.951909	0.924967	0.899223	0.892921	0.896287
	50	0.93246	0.935893	0.924399	0.930775	0.88573	1	0.95667	0.936138	0.934433	0.932451
	60	0.96314	0.971759	0.959336	0.977345	0.941197	0.965155	0.981797	0.954804	0.970748	0.965225
	70	1	1	1	1	1	0.959693	1	1	1	1

## Sheet: Supplementary Fig 6a
	Elution volume (ml)	mAU
	0	-1.38784
	0.001	-1.3878
	0.002	-1.38821
	0.003	-1.38921
	0.004	-1.38951
	0.005	-1.38988
	0.005	-1.3907
	0.006	-1.39159
	0.007	-1.39173
	0.008	-1.39167
	0.009	-1.39245
	0.01	-1.39302
	0.01	-1.39343
	0.011	-1.39437
	0.012	-1.3954
	0.013	-1.39649
	0.014	-1.39764
	0.015	-1.3986
	0.015	-1.3995
	0.016	-1.40048
	0.017	-1.40087
	0.018	-1.40098
	0.019	-1.40144
	0.02	-1.40184
	0.02	-1.40235
	0.021	-1.40245
	0.022	-1.40245
	0.023	-1.4027
	0.024	-1.40264
	0.025	-1.40169
	0.025	-1.39942
	0.026	-1.39616
	0.027	-1.39099
	0.028	-1.38503
	0.029	-1.37986
	0.029	-1.32484
	0.03	-1.22487
	0.031	-1.21663
	0.032	-1.21478
	0.033	-1.21517
	0.034	-1.21532
	0.034	-1.21482
	0.035	-1.21448
	0.036	-1.21448
	0.037	-1.21528
	0.038	-1.21503
	0.039	-1.2152
	0.039	-1.21481
	0.04	-1.21425
	0.041	-1.21409
	0.042	-1.21371
	0.043	-1.21352
	0.044	-1.21454
	0.044	-1.21467
	0.045	-1.2148
	0.046	-1.21369
	0.047	-1.21317
	0.048	-1.21191
	0.049	-1.21082
	0.049	-1.20974
	0.05	-1.20832
	0.051	-1.20716
	0.052	-1.20522
	0.053	-1.2024
	0.054	-1.20015
	0.054	-1.19712
	0.055	-1.19302
	0.056	-1.18797
	0.057	-1.18436
	0.058	-1.18065
	0.059	-1.1768
	0.059	-1.17392
	0.06	-1.17036
	0.061	-1.16674
	0.062	-1.16335
	0.063	-1.15881
	0.064	-1.15437
	0.064	-1.14985
	0.065	-1.14406
	0.066	-1.14016
	0.067	-1.13493
	0.068	-1.12892
	0.069	-1.12346
	0.069	-1.11836
	0.07	-1.11345
	0.071	-1.10784
	0.072	-1.10252
	0.073	-1.09801
	0.074	-1.09244
	0.074	-1.08686
	0.075	-1.08122
	0.076	-1.07549
	0.077	-1.07
	0.078	-1.06408
	0.079	-1.05906
	0.079	-1.05447
	0.08	-1.05
	0.081	-1.04564
	0.082	-1.04168
	0.083	-1.03758
	0.084	-1.0335
	0.084	-1.02825
	0.085	-1.02274
	0.086	-1.01705
	0.087	-1.01147
	0.088	-1.00595
	0.089	-1.00015
	0.089	-0.995695
	0.09	-0.991535
	0.091	-0.987536
	0.092	-0.984394
	0.093	-0.980962
	0.094	-0.978221
	0.094	-0.976963
	0.095	-0.975521
	0.096	-0.974577
	0.097	-0.974972
	0.098	-0.975569
	0.099	-0.976035
	0.099	-0.976015
	0.1	-0.975821
	0.101	-0.974511
	0.102	-0.973706
	0.103	-0.973812
	0.103	-0.974098
	0.104	-0.974722
	0.105	-0.97565
	0.106	-0.97611
	0.107	-0.977557
	0.108	-0.979143
	0.108	-0.981746
	0.109	-0.98376
	0.11	-0.984572
	0.111	-0.985674
	0.112	-0.988577
	0.113	-0.991509
	0.113	-0.994321
	0.114	-0.997691
	0.115	-1.00093
	0.116	-1.00332
	0.117	-1.00588
	0.118	-1.00858
	0.118	-1.01148
	0.119	-1.01454
	0.12	-1.01696
	0.121	-1.01871
	0.122	-1.02072
	0.123	-1.023
	0.123	-1.02481
	0.124	-1.02753
	0.125	-1.02968
	0.126	-1.03249
	0.127	-1.03575
	0.128	-1.03976
	0.128	-1.04337
	0.129	-1.04768
	0.13	-1.0528
	0.131	-1.05659
	0.132	-1.05924
	0.133	-1.06356
	0.133	-1.06635
	0.134	-1.06998
	0.135	-1.07385
	0.136	-1.07622
	0.137	-1.0776
	0.138	-1.07883
	0.138	-1.07984
	0.139	-1.08108
	0.14	-1.08119
	0.141	-1.08102
	0.142	-1.08154
	0.143	-1.08211
	0.143	-1.08058
	0.144	-1.07777
	0.145	-1.07412
	0.146	-1.07109
	0.147	-1.06876
	0.148	-1.06611
	0.148	-1.06267
	0.149	-1.05828
	0.15	-1.05354
	0.151	-1.0494
	0.152	-1.04609
	0.153	-1.0421
	0.153	-1.03591
	0.154	-1.02949
	0.155	-1.02304
	0.156	-1.01561
	0.157	-1.00835
	0.158	-1.0017
	0.158	-0.994612
	0.159	-0.987044
	0.16	-0.979137
	0.161	-0.971277
	0.162	-0.962679
	0.163	-0.95349
	0.163	-0.944336
	0.164	-0.935147
	0.165	-0.925812
	0.166	-0.914907
	0.167	-0.904334
	0.168	-0.894235
	0.168	-0.883679
	0.169	-0.872123
	0.17	-0.860211
	0.171	-0.846691
	0.172	-0.831439
	0.173	-0.817848
	0.173	-0.805732
	0.174	-0.790561
	0.175	-0.775757
	0.176	-0.760284
	0.177	-0.743772
	0.178	-0.726771
	0.178	-0.709673
	0.179	-0.692254
	0.18	-0.674412
	0.181	-0.655966
	0.182	-0.638288
	0.182	-0.620565
	0.183	-0.601038
	0.184	-0.58092
	0.185	-0.562032
	0.186	-0.543522
	0.187	-0.525915
	0.187	-0.507781
	0.188	-0.488602
	0.189	-0.470458
	0.19	-0.452394
	0.191	-0.434194
	0.192	-0.416611
	0.192	-0.39832
	0.193	-0.380184
	0.194	-0.362623
	0.195	-0.345361
	0.196	-0.327326
	0.197	-0.309037
	0.197	-0.291792
	0.198	-0.275085
	0.199	-0.259042
	0.2	-0.242577
	0.201	-0.225186
	0.202	-0.207399
	0.202	-0.189068
	0.203	-0.170135
	0.204	-0.151487
	0.205	-0.132793
	0.206	-0.113606
	0.207	-0.0938255
	0.207	-0.0746298
	0.208	-0.0562651
	0.209	-0.0371347
	0.21	-0.017587
	0.211	0.00139457
	0.212	0.0200335
	0.212	0.0378365
	0.213	0.0545929
	0.214	0.0725066
	0.215	0.0916023
	0.216	0.109863
	0.217	0.127677
	0.217	0.145293
	0.218	0.162404
	0.219	0.178273
	0.22	0.193183
	0.221	0.207641
	0.222	0.221774
	0.222	0.235541
	0.223	0.249051
	0.224	0.262166
	0.225	0.274273
	0.226	0.285905
	0.227	0.297529
	0.227	0.308652
	0.228	0.320112
	0.229	0.331036
	0.23	0.342089
	0.231	0.353408
	0.232	0.364655
	0.232	0.375387
	0.233	0.385778
	0.234	0.396235
	0.235	0.406348
	0.236	0.41649
	0.237	0.426575
	0.237	0.436214
	0.238	0.44491
	0.239	0.454245
	0.24	0.463823
	0.241	0.472598
	0.242	0.480395
	0.242	0.487726
	0.243	0.495368
	0.244	0.502316
	0.245	0.508152
	0.246	0.513374
	0.247	0.518512
	0.247	0.523065
	0.248	0.526875
	0.249	0.53059
	0.25	0.534903
	0.251	0.538711
	0.252	0.541983
	0.252	0.544904
	0.253	0.547046
	0.254	0.54866
	0.255	0.550451
	0.256	0.551765
	0.256	0.552364
	0.257	0.551969
	0.258	0.551247
	0.259	0.550704
	0.26	0.549428
	0.261	0.547242
	0.261	0.544995
	0.262	0.542114
	0.263	0.539117
	0.264	0.535664
	0.265	0.531798
	0.266	0.527531
	0.266	0.5236
	0.267	0.51941
	0.268	0.51402
	0.269	0.508238
	0.27	0.502003
	0.271	0.495915
	0.271	0.490272
	0.272	0.483374
	0.273	0.476762
	0.274	0.47014
	0.275	0.46343
	0.276	0.456039
	0.276	0.448142
	0.277	0.440753
	0.278	0.433421
	0.279	0.425119
	0.28	0.416058
	0.281	0.406438
	0.281	0.396697
	0.282	0.387142
	0.283	0.377526
	0.284	0.368351
	0.285	0.35871
	0.286	0.3488
	0.286	0.338495
	0.287	0.32802
	0.288	0.318196
	0.289	0.308166
	0.29	0.297306
	0.291	0.286217
	0.291	0.274735
	0.292	0.262873
	0.293	0.250951
	0.294	0.238749
	0.295	0.226437
	0.296	0.214691
	0.296	0.203339
	0.297	0.191174
	0.298	0.178523
	0.299	0.166721
	0.3	0.154907
	0.301	0.142308
	0.301	0.130043
	0.302	0.118353
	0.303	0.106922
	0.304	0.0954029
	0.305	0.0837233
	0.306	0.0736855
	0.306	0.064132
	0.307	0.0539006
	0.308	0.0424882
	0.309	0.030727
	0.31	0.0193893
	0.311	0.0083647
	0.311	-0.0025197
	0.312	-0.0137839
	0.313	-0.0258309
	0.314	-0.03773
	0.315	-0.0492223
	0.316	-0.0607617
	0.316	-0.0721111
	0.317	-0.0838682
	0.318	-0.0945702
	0.319	-0.105883
	0.32	-0.117892
	0.321	-0.12858
	0.321	-0.137966
	0.322	-0.147655
	0.323	-0.157239
	0.324	-0.167228
	0.325	-0.177597
	0.326	-0.188513
	0.326	-0.199298
	0.327	-0.209552
	0.328	-0.218856
	0.329	-0.22826
	0.33	-0.238611
	0.331	-0.249037
	0.331	-0.257463
	0.332	-0.266547
	0.333	-0.275522
	0.334	-0.28421
	0.335	-0.29253
	0.335	-0.301535
	0.336	-0.310375
	0.337	-0.318575
	0.338	-0.327371
	0.339	-0.336185
	0.34	-0.344366
	0.34	-0.352133
	0.341	-0.359635
	0.342	-0.366705
	0.343	-0.373688
	0.344	-0.381895
	0.345	-0.389535
	0.345	-0.396765
	0.346	-0.403021
	0.347	-0.410523
	0.348	-0.417385
	0.349	-0.423612
	0.35	-0.43044
	0.35	-0.436894
	0.351	-0.443466
	0.352	-0.450166
	0.353	-0.456428
	0.354	-0.462564
	0.355	-0.468614
	0.355	-0.474834
	0.356	-0.481186
	0.357	-0.487077
	0.358	-0.493267
	0.359	-0.498163
	0.36	-0.50348
	0.36	-0.508823
	0.361	-0.514729
	0.362	-0.519478
	0.363	-0.525551
	0.364	-0.530706
	0.365	-0.537042
	0.365	-0.542546
	0.366	-0.547604
	0.367	-0.552676
	0.368	-0.557683
	0.369	-0.561696
	0.37	-0.567152
	0.37	-0.572823
	0.371	-0.577315
	0.372	-0.58162
	0.373	-0.586646
	0.374	-0.591904
	0.375	-0.596483
	0.375	-0.600546
	0.376	-0.605396
	0.377	-0.610117
	0.378	-0.614196
	0.379	-0.618446
	0.38	-0.623779
	0.38	-0.627904
	0.381	-0.630732
	0.382	-0.634653
	0.383	-0.63926
	0.384	-0.644549
	0.385	-0.649196
	0.385	-0.65255
	0.386	-0.655506
	0.387	-0.659947
	0.388	-0.663917
	0.389	-0.66757
	0.39	-0.671506
	0.39	-0.676743
	0.391	-0.680808
	0.392	-0.685304
	0.393	-0.688911
	0.394	-0.692492
	0.395	-0.697287
	0.395	-0.700834
	0.396	-0.704616
	0.397	-0.708006
	0.398	-0.711083
	0.399	-0.715554
	0.4	-0.718448
	0.4	-0.721389
	0.401	-0.725379
	0.402	-0.728651
	0.403	-0.731479
	0.404	-0.73652
	0.405	-0.739633
	0.405	-0.742863
	0.406	-0.746384
	0.407	-0.749705
	0.408	-0.753226
	0.409	-0.756428
	0.409	-0.759171
	0.41	-0.763364
	0.411	-0.766477
	0.412	-0.769166
	0.413	-0.772075
	0.414	-0.774701
	0.414	-0.777774
	0.415	-0.781305
	0.416	-0.784408
	0.417	-0.788932
	0.418	-0.79322
	0.419	-0.796246
	0.419	-0.798774
	0.42	-0.802482
	0.421	-0.804989
	0.422	-0.807686
	0.423	-0.812214
	0.424	-0.815232
	0.424	-0.817911
	0.425	-0.821495
	0.426	-0.824204
	0.427	-0.828221
	0.428	-0.832058
	0.429	-0.834792
	0.429	-0.837987
	0.43	-0.841908
	0.431	-0.845595
	0.432	-0.847434
	0.433	-0.849923
	0.434	-0.85201
	0.434	-0.854763
	0.435	-0.858309
	0.436	-0.859997
	0.437	-0.863273
	0.438	-0.866296
	0.439	-0.870058
	0.439	-0.873593
	0.44	-0.876652
	0.441	-0.879409
	0.442	-0.883747
	0.443	-0.886251
	0.444	-0.889455
	0.444	-0.892483
	0.445	-0.894548
	0.446	-0.898786
	0.447	-0.902389
	0.448	-0.905482
	0.449	-0.907913
	0.449	-0.910899
	0.45	-0.913177
	0.451	-0.916677
	0.452	-0.920122
	0.453	-0.923312
	0.454	-0.926153
	0.454	-0.929609
	0.455	-0.932992
	0.456	-0.936122
	0.457	-0.938931
	0.458	-0.940881
	0.459	-0.942437
	0.459	-0.94421
	0.46	-0.946609
	0.461	-0.949924
	0.462	-0.951695
	0.463	-0.954615
	0.464	-0.957491
	0.464	-0.958915
	0.465	-0.961251
	0.466	-0.963568
	0.467	-0.965169
	0.468	-0.967886
	0.469	-0.97029
	0.469	-0.973042
	0.47	-0.975541
	0.471	-0.977482
	0.472	-0.97904
	0.473	-0.980778
	0.474	-0.984074
	0.474	-0.986442
	0.475	-0.989206
	0.476	-0.990967
	0.477	-0.993183
	0.478	-0.995627
	0.479	-0.998335
	0.479	-0.999754
	0.48	-1.00089
	0.481	-1.0021
	0.482	-1.00312
	0.483	-1.0055
	0.484	-1.00744
	0.484	-1.01012
	0.485	-1.01262
	0.486	-1.01485
	0.487	-1.01714
	0.488	-1.01955
	0.488	-1.02138
	0.489	-1.02366
	0.49	-1.02705
	0.491	-1.029
	0.492	-1.03099
	0.493	-1.03362
	0.493	-1.03459
	0.494	-1.03568
	0.495	-1.03748
	0.496	-1.03947
	0.497	-1.04073
	0.498	-1.04272
	0.498	-1.04421
	0.499	-1.04719
	0.5	-1.04917
	0.501	-1.05055
	0.502	-1.05246
	0.503	-1.05368
	0.503	-1.05587
	0.504	-1.05829
	0.505	-1.0596
	0.506	-1.06191
	0.507	-1.06405
	0.508	-1.06585
	0.508	-1.06692
	0.509	-0.0914994
	0.51	-0.0012471
	0.511	-0.0023685
	0.512	-0.0034968
	0.513	-0.0053621
	0.513	-0.007577
	0.514	-0.0101276
	0.515	-0.0111971
	0.516	-0.0130087
	0.517	-0.0143496
	0.518	-0.0162679
	0.518	-0.0173021
	0.519	-0.0194885
	0.52	-0.0205539
	0.521	-0.0231947
	0.522	-0.0254624
	0.523	-0.0273212
	0.523	-0.0297619
	0.524	-0.0310493
	0.525	-0.0323434
	0.526	-0.0333228
	0.527	-0.0334751
	0.528	-0.0346952
	0.528	-0.0357903
	0.529	-0.0363224
	0.53	-0.0376037
	0.531	-0.0380985
	0.532	-0.0384994
	0.533	-0.0402231
	0.533	-0.0419048
	0.534	-0.0430127
	0.535	-0.0447525
	0.536	-0.0471219
	0.537	-0.0489879
	0.538	-0.0495089
	0.538	-0.0511839
	0.539	-0.0529196
	0.54	-0.0544476
	0.541	-0.0553086
	0.542	-0.0564877
	0.543	-0.05823
	0.543	-0.0602167
	0.544	-0.0619037
	0.545	-0.0634376
	0.546	-0.0642533
	0.547	-0.0658179
	0.548	-0.0673723
	0.548	-0.0678544
	0.549	-0.068923
	0.55	-0.0699022
	0.551	-0.0709755
	0.552	-0.0718603
	0.553	-0.0729585
	0.553	-0.0744647
	0.554	-0.0765748
	0.555	-0.078044
	0.556	-0.0785367
	0.557	-0.0799682
	0.558	-0.0817343
	0.558	-0.0835393
	0.559	-0.0220316
	0.56	-0.0007839
	0.561	-0.0018835
	0.562	-0.003148
	0.562	-0.0034446
	0.563	-0.003841
	0.564	-0.0043061
	0.565	-0.0044285
	0.566	-0.005673
	0.567	-0.0064729
	0.567	-0.0079145
	0.568	-0.0096529
	0.569	-0.0112192
	0.57	-0.0125141
	0.571	-0.0133282
	0.572	-0.0146302
	0.572	-0.0161207
	0.573	-0.0167541
	0.574	-0.0170212
	0.575	-0.0178536
	0.576	-0.0190257
	0.577	-0.0202294
	0.577	-0.0212827
	0.578	-0.0215211
	0.579	-0.0226409
	0.58	-0.0244668
	0.581	-0.0252474
	0.582	-0.0259762
	0.582	-0.0271559
	0.583	-0.0283072
	0.584	-0.0292246
	0.585	-0.0296879
	0.586	-0.0300758
	0.587	-0.0306089
	0.587	-0.0311011
	0.588	-0.0312511
	0.589	-0.0312765
	0.59	-0.032653
	0.591	-0.034178
	0.592	-0.035376
	0.592	-0.0363888
	0.593	-0.0371502
	0.594	-0.0380211
	0.595	-0.0388366
	0.596	-0.0389344
	0.597	-0.0390746
	0.597	-0.0400359
	0.598	-0.040481
	0.599	-0.040325
	0.6	-0.0405681
	0.601	-0.0411453
	0.602	-0.0418659
	0.602	-0.0423899
	0.603	-0.0432224
	0.604	-0.0441879
	0.605	-0.045628
	0.606	-0.0193884
	0.607	-0.001209
	0.607	-0.0024554
	0.608	-0.0038144
	0.609	-0.0048031
	0.61	-0.0060398
	0.611	-0.0072814
	0.612	-0.0081922
	0.612	-0.0099715
	0.613	-0.0113043
	0.614	-0.0117053
	0.615	-0.0125338
	0.616	-0.0138959
	0.617	-0.0145159
	0.617	-0.0149085
	0.618	-0.015087
	0.619	-0.0155817
	0.62	-0.0172472
	0.621	-0.018235
	0.622	-0.018691
	0.622	-0.0198002
	0.623	-0.0208269
	0.624	-0.0214161
	0.625	-0.0225055
	0.626	-0.0234552
	0.627	-0.0236669
	0.627	-0.0238666
	0.628	-0.0247897
	0.629	-0.0261118
	0.63	-0.0273365
	0.631	-0.0285328
	0.632	-0.0295509
	0.632	-0.0303567
	0.633	-0.0315121
	0.634	-0.0326271
	0.635	-0.032957
	0.636	-0.0330778
	0.637	-0.0338637
	0.637	-0.0350866
	0.638	-0.0364395
	0.639	-0.0373482
	0.64	-0.0384933
	0.641	-0.0395707
	0.641	-0.0404297
	0.642	-0.0418638
	0.643	-0.0429414
	0.644	-0.043651
	0.645	-0.0443776
	0.646	-0.0451015
	0.646	-0.0461474
	0.647	-0.0466369
	0.648	-0.0469738
	0.649	-0.0475508
	0.65	-0.0476953
	0.651	-0.047821
	0.651	-0.0478803
	0.652	-0.0469853
	0.653	-0.0471964
	0.654	-0.0477684
	0.655	-0.0477354
	0.656	-0.0484284
	0.656	-0.0496497
	0.657	-0.050112
	0.658	-0.0509655
	0.659	-0.0519518
	0.66	-0.0526011
	0.661	-0.053498
	0.661	-0.0539526
	0.662	-0.0545952
	0.663	-0.0551591
	0.664	-0.05562
	0.665	-0.0561285
	0.666	-0.0569708
	0.666	-0.0578994
	0.667	-0.0585156
	0.668	-0.0599189
	0.669	-0.0614748
	0.67	-0.0620513
	0.671	-0.0623726
	0.671	-0.063026
	0.672	-0.0635695
	0.673	-0.0638641
	0.674	-0.0641914
	0.675	-0.0643104
	0.676	-0.0652639
	0.676	-0.066799
	0.677	-0.067593
	0.678	-0.06797
	0.679	-0.0683019
	0.68	-0.0686089
	0.681	-0.0689455
	0.681	-0.0694128
	0.682	-0.070363
	0.683	-0.0714778
	0.684	-0.0716587
	0.685	-0.071823
	0.686	-0.0724208
	0.686	-0.0727987
	0.687	-0.0734405
	0.688	-0.073532
	0.689	-0.073106
	0.69	-0.07349
	0.691	-0.0740829
	0.691	-0.0754601
	0.692	-0.0760314
	0.693	-0.0758025
	0.694	-0.0770996
	0.695	-0.0786352
	0.696	-0.0793482
	0.696	-0.0800802
	0.697	-0.0809249
	0.698	-0.0810927
	0.699	-0.082134
	0.7	-0.0828972
	0.701	-0.0834574
	0.701	-0.0836574
	0.702	-0.0834816
	0.703	-0.0842307
	0.704	-0.0842318
	0.705	-0.0840651
	0.706	-0.0844293
	0.706	-0.0849764
	0.707	-0.085422
	0.708	-0.0860566
	0.709	-0.0865626
	0.71	-0.0866797
	0.711	-0.0866045
	0.711	-0.0871095
	0.712	-0.0876493
	0.713	-0.0882946
	0.714	-0.0891935
	0.715	-0.0895863
	0.715	-0.0901704
	0.716	-0.0912855
	0.717	-0.0914571
	0.718	-0.0912742
	0.719	-0.0920259
	0.72	-0.0924052
	0.72	-0.0930122
	0.721	-0.093777
	0.722	-0.0948016
	0.723	-0.0951884
	0.724	-0.0948879
	0.725	-0.0948465
	0.725	-0.0954831
	0.726	-0.0962544
	0.727	-0.0970428
	0.728	-0.097826
	0.729	-0.0982176
	0.73	-0.0986809
	0.73	-0.0993706
	0.731	-0.0997575
	0.732	-0.0999328
	0.733	-0.100172
	0.734	-0.100983
	0.735	-0.10271
	0.735	-0.103091
	0.736	-0.102485
	0.737	-0.102645
	0.738	-0.10311
	0.739	-0.103248
	0.74	-0.103775
	0.74	-0.103745
	0.741	-0.10319
	0.742	-0.102364
	0.743	-0.103851
	0.744	-0.105195
	0.745	-0.105323
	0.745	-0.106412
	0.746	-0.107225
	0.747	-0.107349
	0.748	-0.108255
	0.749	-0.108367
	0.75	-0.108138
	0.75	-0.108951
	0.751	-0.110017
	0.752	-0.110126
	0.753	-0.110405
	0.754	-0.110531
	0.755	-0.110907
	0.755	-0.110656
	0.756	-0.110759
	0.757	-0.1113
	0.758	-0.111748
	0.759	-0.112097
	0.76	-0.113409
	0.76	-0.113896
	0.761	-0.114842
	0.762	-0.115097
	0.763	-0.115129
	0.764	-0.115459
	0.765	-0.116249
	0.765	-0.116557
	0.766	-0.116883
	0.767	-0.116927
	0.768	-0.117316
	0.769	-0.118123
	0.77	-0.118072
	0.77	-0.11879
	0.771	-0.119408
	0.772	-0.120386
	0.773	-0.121162
	0.774	-0.121359
	0.775	-0.121454
	0.775	-0.121818
	0.776	-0.121454
	0.777	-0.122233
	0.778	-0.122517
	0.779	-0.122183
	0.78	-0.122363
	0.78	-0.121795
	0.781	-0.122713
	0.782	-0.1236
	0.783	-0.124618
	0.784	-0.125612
	0.785	-0.125286
	0.785	-0.125167
	0.786	-0.125532
	0.787	-0.125334
	0.788	-0.126077
	0.789	-0.12644
	0.789	-0.126856
	0.79	-0.127078
	0.791	-0.127296
	0.792	-0.126436
	0.793	-0.126116
	0.794	-0.127173
	0.794	-0.127577
	0.795	-0.12749
	0.796	-0.127431
	0.797	-0.127689
	0.798	-0.128688
	0.799	-0.129889
	0.799	-0.129929
	0.8	-0.130181
	0.801	-0.129933
	0.802	-0.130303
	0.803	-0.130215
	0.804	-0.129978
	0.804	-0.130363
	0.805	-0.129953
	0.806	-0.128908
	0.807	-0.130106
	0.808	-0.130966
	0.809	-0.13153
	0.809	-0.1313
	0.81	-0.130985
	0.811	-0.131685
	0.812	-0.132017
	0.813	-0.132029
	0.814	-0.132433
	0.814	-0.132874
	0.815	-0.133851
	0.816	-0.134997
	0.817	-0.135251
	0.818	-0.136525
	0.819	-0.137221
	0.819	-0.138396
	0.82	-0.140164
	0.821	-0.139986
	0.822	-0.141249
	0.823	-0.141534
	0.824	-0.141519
	0.824	-0.141803
	0.825	-0.141876
	0.826	-0.142342
	0.827	-0.143674
	0.828	-0.144155
	0.829	-0.144977
	0.829	-0.144843
	0.83	-0.145568
	0.831	-0.144926
	0.832	-0.144988
	0.833	-0.144607
	0.834	-0.144959
	0.834	-0.145694
	0.835	-0.146311
	0.836	-0.145778
	0.837	-0.145432
	0.838	-0.14577
	0.839	-0.146216
	0.839	-0.14631
	0.84	-0.146258
	0.841	-0.14636
	0.842	-0.14659
	0.843	-0.146846
	0.844	-0.147113
	0.844	-0.147676
	0.845	-0.148214
	0.846	-0.149311
	0.847	-0.149566
	0.848	-0.150303
	0.849	-0.150189
	0.849	-0.149795
	0.85	-0.14999
	0.851	-0.150626
	0.852	-0.151403
	0.853	-0.152069
	0.854	-0.151573
	0.854	-0.151938
	0.855	-0.152843
	0.856	-0.153321
	0.857	-0.154084
	0.858	-0.154143
	0.859	-0.154493
	0.859	-0.154627
	0.86	-0.154867
	0.861	-0.155316
	0.862	-0.15448
	0.863	-0.155007
	0.864	-0.156324
	0.864	-0.156534
	0.865	-0.156777
	0.866	-0.15614
	0.867	-0.156366
	0.868	-0.156479
	0.868	-0.156413
	0.869	-0.156604
	0.87	-0.15658
	0.871	-0.156668
	0.872	-0.156609
	0.873	-0.15717
	0.873	-0.157786
	0.874	-0.159119
	0.875	-0.159999
	0.876	-0.160231
	0.877	-0.159685
	0.878	-0.159696
	0.878	-0.160912
	0.879	-0.161661
	0.88	-0.162323
	0.881	-0.162205
	0.882	-0.162138
	0.883	-0.162507
	0.883	-0.162838
	0.884	-0.163145
	0.885	-0.163451
	0.886	-0.163469
	0.887	-0.164352
	0.888	-0.163743
	0.888	-0.164115
	0.889	-0.164246
	0.89	-0.164697
	0.891	-0.1647
	0.892	-0.164187
	0.893	-0.164508
	0.893	-0.1646
	0.894	-0.164862
	0.895	-0.165784
	0.896	-0.166063
	0.897	-0.165919
	0.898	-0.165533
	0.898	-0.165107
	0.899	-0.164926
	0.9	-0.164397
	0.901	-0.164144
	0.902	-0.163999
	0.903	-0.163406
	0.903	-0.163635
	0.904	-0.16368
	0.905	-0.163219
	0.906	-0.163258
	0.907	-0.163735
	0.908	-0.164715
	0.908	-0.165495
	0.909	-0.166338
	0.91	-0.166718
	0.911	-0.167087
	0.912	-0.166965
	0.913	-0.167206
	0.913	-0.167163
	0.914	-0.16725
	0.915	-0.167246
	0.916	-0.167311
	0.917	-0.167376
	0.918	-0.167352
	0.918	-0.167076
	0.919	-0.168015
	0.92	-0.168167
	0.921	-0.168509
	0.922	-0.169033
	0.923	-0.170087
	0.923	-0.171148
	0.924	-0.171341
	0.925	-0.171187
	0.926	-0.170978
	0.927	-0.170347
	0.928	-0.170078
	0.928	-0.169374
	0.929	-0.169254
	0.93	-0.169322
	0.931	-0.169252
	0.932	-0.169372
	0.933	-0.170129
	0.933	-0.170326
	0.934	-0.170485
	0.935	-0.169929
	0.936	-0.168886
	0.937	-0.16821
	0.938	-0.168117
	0.938	-0.167391
	0.939	-0.167001
	0.94	-0.166858
	0.941	-0.166981
	0.942	-0.168255
	0.942	-0.169006
	0.943	-0.16913
	0.944	-0.169452
	0.945	-0.16912
	0.946	-0.169316
	0.947	-0.168295
	0.947	-0.168094
	0.948	-0.168242
	0.949	-0.168486
	0.95	-0.168715
	0.951	-0.168575
	0.952	-0.167471
	0.952	-0.166625
	0.953	-0.166899
	0.954	-0.16738
	0.955	-0.168123
	0.956	-0.168108
	0.957	-0.168704
	0.957	-0.169606
	0.958	-0.169791
	0.959	-0.170011
	0.96	-0.170779
	0.961	-0.171403
	0.962	-0.171817
	0.962	-0.171816
	0.963	-0.171249
	0.964	-0.170955
	0.965	-0.170182
	0.966	-0.170029
	0.967	-0.170839
	0.967	-0.171224
	0.968	-0.171399
	0.969	-0.172232
	0.97	-0.172981
	0.971	-0.173252
	0.972	-0.173474
	0.972	-0.173764
	0.973	-0.174398
	0.974	-0.174968
	0.975	-0.17524
	0.976	-0.17496
	0.977	-0.175536
	0.977	-0.176893
	0.978	-0.17754
	0.979	-0.17772
	0.98	-0.178386
	0.981	-0.179752
	0.982	-0.180819
	0.982	-0.180898
	0.983	-0.180796
	0.984	-0.180872
	0.985	-0.181533
	0.986	-0.182036
	0.987	-0.182802
	0.987	-0.183334
	0.988	-0.184563
	0.989	-0.185742
	0.99	-0.186205
	0.991	-0.186355
	0.992	-0.186756
	0.992	-0.187131
	0.993	-0.188671
	0.994	-0.18976
	0.995	-0.189673
	0.996	-0.190053
	0.997	-0.190227
	0.997	-0.190764
	0.998	-0.191129
	0.999	-0.191475
	1	-0.192226
	1.001	-0.192628
	1.002	-0.19264
	1.002	-0.192722
	1.003	-0.192848
	1.004	-0.193008
	1.005	-0.193234
	1.006	-0.192944
	1.007	-0.192906
	1.007	-0.19347
	1.008	-0.19376
	1.009	-0.194276
	1.01	-0.195543
	1.011	-0.196386
	1.012	-0.197025
	1.012	-0.197647
	1.013	-0.197854
	1.014	-0.198279
	1.015	-0.198251
	1.016	-0.197935
	1.017	-0.198267
	1.017	-0.199213
	1.018	-0.199811
	1.019	-0.199698
	1.02	-0.199827
	1.021	-0.200805
	1.021	-0.201428
	1.022	-0.201434
	1.023	-0.20077
	1.024	-0.200787
	1.025	-0.201297
	1.026	-0.200756
	1.026	-0.200245
	1.027	-0.200091
	1.028	-0.199917
	1.029	-0.199558
	1.03	-0.198622
	1.031	-0.197584
	1.031	-0.197304
	1.032	-0.197216
	1.033	-0.197145
	1.034	-0.196995
	1.035	-0.196711
	1.036	-0.196362
	1.036	-0.196596
	1.037	-0.19677
	1.038	-0.196396
	1.039	-0.196402
	1.04	-0.195805
	1.041	-0.194728
	1.041	-0.194054
	1.042	-0.193356
	1.043	-0.193019
	1.044	-0.193018
	1.045	-0.193338
	1.046	-0.193599
	1.046	-0.193915
	1.047	-0.194614
	1.048	-0.195102
	1.049	-0.19465
	1.05	-0.194142
	1.051	-0.193835
	1.051	-0.193107
	1.052	-0.192004
	1.053	-0.191218
	1.054	-0.191274
	1.055	-0.191345
	1.056	-0.190943
	1.056	-0.190962
	1.057	-0.190977
	1.058	-0.191472
	1.059	-0.191497
	1.06	-0.191583
	1.061	-0.191739
	1.061	-0.19128
	1.062	-0.191102
	1.063	-0.190932
	1.064	-0.190445
	1.065	-0.190406
	1.066	-0.190715
	1.066	-0.190402
	1.067	-0.190877
	1.068	-0.191414
	1.069	-0.191449
	1.07	-0.19196
	1.071	-0.192616
	1.071	-0.193375
	1.072	-0.194598
	1.073	-0.195088
	1.074	-0.194914
	1.075	-0.194973
	1.076	-0.195063
	1.076	-0.194945
	1.077	-0.194681
	1.078	-0.194688
	1.079	-0.19425
	1.08	-0.194118
	1.081	-0.19378
	1.081	-0.193209
	1.082	-0.193387
	1.083	-0.193582
	1.084	-0.194074
	1.085	-0.195037
	1.086	-0.195399
	1.086	-0.195129
	1.087	-0.194557
	1.088	-0.194576
	1.089	-0.194613
	1.09	-0.194152
	1.091	-0.194411
	1.091	-0.195028
	1.092	-0.195092
	1.093	-0.195182
	1.094	-0.195324
	1.095	-0.195936
	1.095	-0.195567
	1.096	-0.196284
	1.097	-0.196602
	1.098	-0.196349
	1.099	-0.197033
	1.1	-0.197072
	1.1	-0.197539
	1.101	-0.197736
	1.102	-0.197939
	1.103	-0.198068
	1.104	-0.197607
	1.105	-0.197495
	1.105	-0.198176
	1.106	-0.198786
	1.107	-0.19862
	1.108	-0.197957
	1.109	-0.19755
	1.11	-0.19777
	1.11	-0.198448
	1.111	-0.198368
	1.112	-0.198566
	1.113	-0.199343
	1.114	-0.199378
	1.115	-0.198687
	1.115	-0.198354
	1.116	-0.199113
	1.117	-0.198872
	1.118	-0.19852
	1.119	-0.199149
	1.12	-0.199322
	1.12	-0.199164
	1.121	-0.200068
	1.122	-0.200662
	1.123	-0.201596
	1.124	-0.201757
	1.125	-0.20165
	1.125	-0.201451
	1.126	-0.201476
	1.127	-0.201724
	1.128	-0.201818
	1.129	-0.202595
	1.13	-0.202819
	1.13	-0.20254
	1.131	-0.203565
	1.132	-0.203448
	1.133	-0.202185
	1.134	-0.202282
	1.135	-0.202246
	1.135	-0.202784
	1.136	-0.202337
	1.137	-0.202321
	1.138	-0.201445
	1.139	-0.20174
	1.14	-0.202865
	1.14	-0.201764
	1.141	-0.201815
	1.142	-0.2013
	1.143	-0.200766
	1.144	-0.200459
	1.145	-0.201195
	1.145	-0.20165
	1.146	-0.201723
	1.147	-0.202178
	1.148	-0.202135
	1.149	-0.202656
	1.15	-0.203215
	1.15	-0.20403
	1.151	-0.204197
	1.152	-0.203241
	1.153	-0.203078
	1.154	-0.202439
	1.155	-0.202484
	1.155	-0.202796
	1.156	-0.203423
	1.157	-0.204425
	1.158	-0.204101
	1.159	-0.205188
	1.16	-0.206286
	1.16	-0.206137
	1.161	-0.205633
	1.162	-0.206057
	1.163	-0.205256
	1.164	-0.205407
	1.165	-0.205003
	1.165	-0.205689
	1.166	-0.205492
	1.167	-0.205852
	1.168	-0.20585
	1.169	-0.205314
	1.17	-0.205391
	1.17	-0.205657
	1.171	-0.205849
	1.172	-0.205756
	1.173	-0.205272
	1.174	-0.206031
	1.174	-0.2078
	1.175	-0.208347
	1.176	-0.20814
	1.177	-0.208911
	1.178	-0.208317
	1.179	-0.209024
	1.179	-0.209693
	1.18	-0.209726
	1.181	-0.209255
	1.182	-0.209818
	1.183	-0.210427
	1.184	-0.210336
	1.184	-0.211569
	1.185	-0.211825
	1.186	-0.211993
	1.187	-0.210876
	1.188	-0.211881
	1.189	-0.211129
	1.189	-0.210993
	1.19	-0.211614
	1.191	-0.211981
	1.192	-0.211641
	1.193	-0.211544
	1.194	-0.212047
	1.194	-0.212128
	1.195	-0.211967
	1.196	-0.211035
	1.197	-0.210758
	1.198	-0.210096
	1.199	-0.20998
	1.199	-0.210226
	1.2	-0.209645
	1.201	-0.209498
	1.202	-0.209668
	1.203	-0.210109
	1.204	-0.210116
	1.204	-0.210956
	1.205	-0.210803
	1.206	-0.210967
	1.207	-0.210632
	1.208	-0.211265
	1.209	-0.211907
	1.209	-0.212123
	1.21	-0.211974
	1.211	-0.212164
	1.212	-0.211904
	1.213	-0.212204
	1.214	-0.213118
	1.214	-0.213372
	1.215	-0.212588
	1.216	-0.211994
	1.217	-0.211757
	1.218	-0.212103
	1.219	-0.211474
	1.219	-0.211897
	1.22	-0.211676
	1.221	-0.211876
	1.222	-0.210972
	1.223	-0.211216
	1.224	-0.211948
	1.224	-0.211432
	1.225	-0.211945
	1.226	-0.211737
	1.227	-0.211877
	1.228	-0.211742
	1.229	-0.211795
	1.229	-0.21102
	1.23	-0.210987
	1.231	-0.210713
	1.232	-0.209384
	1.233	-0.209736
	1.234	-0.210086
	1.234	-0.209485
	1.235	-0.210245
	1.236	-0.210305
	1.237	-0.210826
	1.238	-0.211585
	1.239	-0.211227
	1.239	-0.211791
	1.24	-0.210563
	1.241	-0.210423
	1.242	-0.20986
	1.243	-0.210107
	1.244	-0.210366
	1.244	-0.209922
	1.245	-0.210637
	1.246	-0.210758
	1.247	-0.210672
	1.248	-0.21131
	1.248	-0.211865
	1.249	-0.212532
	1.25	-0.211786
	1.251	-0.211523
	1.252	-0.211479
	1.253	-0.211198
	1.253	-0.211692
	1.254	-0.211307
	1.255	-0.209805
	1.256	-0.209798
	1.257	-0.209621
	1.258	-0.209881
	1.258	-0.210165
	1.259	-0.209719
	1.26	-0.209778
	1.261	-0.210461
	1.262	-0.210901
	1.263	-0.210944
	1.263	-0.21234
	1.264	-0.211375
	1.265	-0.21038
	1.266	-0.210204
	1.267	-0.209596
	1.268	-0.209321
	1.268	-0.209098
	1.269	-0.209271
	1.27	-0.210068
	1.271	-0.20999
	1.272	-0.209761
	1.273	-0.209922
	1.273	-0.210819
	1.274	-0.211238
	1.275	-0.211221
	1.276	-0.211121
	1.277	-0.210421
	1.278	-0.210165
	1.278	-0.210363
	1.279	-0.210742
	1.28	-0.210714
	1.281	-0.210536
	1.282	-0.211459
	1.283	-0.211699
	1.283	-0.21165
	1.284	-0.212158
	1.285	-0.211994
	1.286	-0.212048
	1.287	-0.211543
	1.288	-0.210816
	1.288	-0.210545
	1.289	-0.210087
	1.29	-0.209812
	1.291	-0.209965
	1.292	-0.210703
	1.293	-0.210492
	1.293	-0.21099
	1.294	-0.211817
	1.295	-0.211554
	1.296	-0.211964
	1.297	-0.213081
	1.298	-0.213492
	1.298	-0.213856
	1.299	-0.213279
	1.3	-0.213665
	1.301	-0.214778
	1.302	-0.215403
	1.303	-0.215133
	1.303	-0.215004
	1.304	-0.216162
	1.305	-0.21578
	1.306	-0.216621
	1.307	-0.217519
	1.308	-0.218598
	1.308	-0.219582
	1.309	-0.219927
	1.31	-0.220244
	1.311	-0.219526
	1.312	-0.219935
	1.313	-0.220925
	1.313	-0.22206
	1.314	-0.222397
	1.315	-0.222954
	1.316	-0.22248
	1.317	-0.222397
	1.318	-0.223279
	1.318	-0.223495
	1.319	-0.224572
	1.32	-0.225473
	1.321	-0.225301
	1.322	-0.225864
	1.323	-0.226355
	1.323	-0.226245
	1.324	-0.226341
	1.325	-0.227217
	1.326	-0.227022
	1.327	-0.226519
	1.327	-0.226784
	1.328	-0.227131
	1.329	-0.22754
	1.33	-0.228503
	1.331	-0.22895
	1.332	-0.22957
	1.332	-0.229984
	1.333	-0.229638
	1.334	-0.229931
	1.335	-0.230655
	1.336	-0.230912
	1.337	-0.231206
	1.337	-0.231445
	1.338	-0.231528
	1.339	-0.231777
	1.34	-0.232318
	1.341	-0.233033
	1.342	-0.232824
	1.342	-0.232598
	1.343	-0.232411
	1.344	-0.232445
	1.345	-0.232657
	1.346	-0.231843
	1.347	-0.231463
	1.347	-0.231358
	1.348	-0.2307
	1.349	-0.230346
	1.35	-0.230364
	1.351	-0.229883
	1.352	-0.229272
	1.352	-0.229681
	1.353	-0.229311
	1.354	-0.228597
	1.355	-0.228125
	1.356	-0.228213
	1.357	-0.227586
	1.357	-0.227676
	1.358	-0.228056
	1.359	-0.227999
	1.36	-0.228358
	1.361	-0.227759
	1.362	-0.226532
	1.362	-0.226545
	1.363	-0.227024
	1.364	-0.227542
	1.365	-0.227623
	1.366	-0.226918
	1.367	-0.226078
	1.367	-0.226193
	1.368	-0.226474
	1.369	-0.226793
	1.37	-0.227629
	1.371	-0.228192
	1.372	-0.227314
	1.372	-0.227389
	1.373	-0.227179
	1.374	-0.226959
	1.375	-0.227075
	1.376	-0.226889
	1.377	-0.226383
	1.377	-0.225675
	1.378	-0.224838
	1.379	-0.224793
	1.38	-0.224749
	1.381	-0.224369
	1.382	-0.224187
	1.382	-0.2242
	1.383	-0.224031
	1.384	-0.223419
	1.385	-0.223047
	1.386	-0.223613
	1.387	-0.224391
	1.387	-0.224861
	1.388	-0.22554
	1.389	-0.225729
	1.39	-0.225547
	1.391	-0.225671
	1.392	-0.2255
	1.392	-0.225892
	1.393	-0.226506
	1.394	-0.226489
	1.395	-0.226636
	1.396	-0.227322
	1.397	-0.227345
	1.397	-0.226683
	1.398	-0.226829
	1.399	-0.227094
	1.4	-0.227215
	1.401	-0.227709
	1.401	-0.227954
	1.402	-0.227913
	1.403	-0.227942
	1.404	-0.22721
	1.405	-0.226609
	1.406	-0.226912
	1.406	-0.227151
	1.407	-0.227331
	1.408	-0.227802
	1.409	-0.227962
	1.41	-0.228145
	1.411	-0.228209
	1.411	-0.227641
	1.412	-0.227008
	1.413	-0.227902
	1.414	-0.228446
	1.415	-0.227893
	1.416	-0.227466
	1.416	-0.227319
	1.417	-0.227593
	1.418	-0.22774
	1.419	-0.228606
	1.42	-0.229467
	1.421	-0.229267
	1.421	-0.228909
	1.422	-0.228741
	1.423	-0.228531
	1.424	-0.228446
	1.425	-0.228575
	1.426	-0.228534
	1.426	-0.228819
	1.427	-0.228691
	1.428	-0.228123
	1.429	-0.227901
	1.43	-0.227812
	1.431	-0.227382
	1.431	-0.227593
	1.432	-0.227581
	1.433	-0.227422
	1.434	-0.227298
	1.435	-0.227603
	1.436	-0.228572
	1.436	-0.229189
	1.437	-0.229348
	1.438	-0.230272
	1.439	-0.231194
	1.44	-0.231138
	1.441	-0.231081
	1.441	-0.230369
	1.442	-0.229446
	1.443	-0.229032
	1.444	-0.229431
	1.445	-0.229788
	1.446	-0.230632
	1.446	-0.231213
	1.447	-0.230861
	1.448	-0.230473
	1.449	-0.231084
	1.45	-0.231554
	1.451	-0.231891
	1.451	-0.231855
	1.452	-0.231792
	1.453	-0.232189
	1.454	-0.232765
	1.455	-0.232851
	1.456	-0.232226
	1.456	-0.232206
	1.457	-0.232706
	1.458	-0.233028
	1.459	-0.232963
	1.46	-0.233065
	1.461	-0.233124
	1.461	-0.232544
	1.462	-0.232466
	1.463	-0.232733
	1.464	-0.23295
	1.465	-0.232885
	1.466	-0.232785
	1.466	-0.232709
	1.467	-0.23295
	1.468	-0.232815
	1.469	-0.232214
	1.47	-0.23175
	1.471	-0.231673
	1.471	-0.231896
	1.472	-0.232632
	1.473	-0.233196
	1.474	-0.232997
	1.475	-0.232549
	1.476	-0.2325
	1.476	-0.232336
	1.477	-0.231878
	1.478	-0.231634
	1.479	-0.231572
	1.48	-0.230399
	1.48	-0.229863
	1.481	-0.230128
	1.482	-0.229834
	1.483	-0.230317
	1.484	-0.230737
	1.485	-0.231149
	1.485	-0.231186
	1.486	-0.231981
	1.487	-0.232383
	1.488	-0.232326
	1.489	-0.232089
	1.49	-0.232606
	1.49	-0.232069
	1.491	-0.232375
	1.492	-0.231684
	1.493	-0.231438
	1.494	-0.23205
	1.495	-0.231791
	1.495	-0.232049
	1.496	-0.231827
	1.497	-0.232199
	1.498	-0.233251
	1.499	-0.233121
	1.5	-0.233005
	1.5	-0.232775
	1.501	-0.233005
	1.502	-0.232523
	1.503	-0.232953
	1.504	-0.233073
	1.505	-0.231802
	1.505	-0.231516
	1.506	-0.231115
	1.507	-0.231141
	1.508	-0.231774
	1.509	-0.232259
	1.51	-0.232911
	1.51	-0.23357
	1.511	-0.234813
	1.512	-0.235373
	1.513	-0.235251
	1.514	-0.234689
	1.515	-0.235078
	1.515	-0.236003
	1.516	-0.23707
	1.517	-0.236815
	1.518	-0.2368
	1.519	-0.236454
	1.52	-0.23642
	1.52	-0.236739
	1.521	-0.237436
	1.522	-0.23794
	1.523	-0.237627
	1.524	-0.237803
	1.525	-0.237871
	1.525	-0.238027
	1.526	-0.238078
	1.527	-0.238271
	1.528	-0.23828
	1.529	-0.237879
	1.53	-0.237915
	1.53	-0.237955
	1.531	-0.237417
	1.532	-0.237308
	1.533	-0.236997
	1.534	-0.237562
	1.535	-0.238128
	1.535	-0.236494
	1.536	-0.235555
	1.537	-0.235928
	1.538	-0.235817
	1.539	-0.235421
	1.54	-0.234914
	1.54	-0.235105
	1.541	-0.234616
	1.542	-0.235689
	1.543	-0.235594
	1.544	-0.234901
	1.545	-0.234898
	1.545	-0.234413
	1.546	-0.236269
	1.547	-0.236927
	1.548	-0.237578
	1.549	-0.238084
	1.55	-0.237134
	1.55	-0.237356
	1.551	-0.237279
	1.552	-0.23755
	1.553	-0.237402
	1.554	-0.237649
	1.554	-0.237903
	1.555	-0.238361
	1.556	-0.238574
	1.557	-0.237546
	1.558	-0.237352
	1.559	-0.237594
	1.559	-0.236932
	1.56	-0.236776
	1.561	-0.237346
	1.562	-0.236229
	1.563	-0.234853
	1.564	-0.234934
	1.564	-0.234498
	1.565	-0.234889
	1.566	-0.234519
	1.567	-0.233922
	1.568	-0.233768
	1.569	-0.233553
	1.569	-0.233
	1.57	-0.232834
	1.571	-0.232909
	1.572	-0.232423
	1.573	-0.233026
	1.574	-0.233106
	1.574	-0.233422
	1.575	-0.233522
	1.576	-0.233137
	1.577	-0.233564
	1.578	-0.235378
	1.579	-0.234116
	1.579	-0.234235
	1.58	-0.234132
	1.581	-0.234172
	1.582	-0.234296
	1.583	-0.234738
	1.584	-0.234533
	1.584	-0.234819
	1.585	-0.235251
	1.586	-0.234859
	1.587	-0.234692
	1.588	-0.234763
	1.589	-0.234728
	1.589	-0.234685
	1.59	-0.235503
	1.591	-0.236472
	1.592	-0.236368
	1.593	-0.237048
	1.594	-0.237633
	1.594	-0.236741
	1.595	-0.235268
	1.596	-0.234606
	1.597	-0.234316
	1.598	-0.233551
	1.599	-0.233864
	1.599	-0.23334
	1.6	-0.233294
	1.601	-0.233954
	1.602	-0.234031
	1.603	-0.23398
	1.604	-0.234715
	1.604	-0.234793
	1.605	-0.235676
	1.606	-0.236808
	1.607	-0.236185
	1.608	-0.235901
	1.609	-0.236904
	1.609	-0.237384
	1.61	-0.237204
	1.611	-0.236958
	1.612	-0.237358
	1.613	-0.237665
	1.614	-0.237987
	1.614	-0.237411
	1.615	-0.237405
	1.616	-0.237147
	1.617	-0.237348
	1.618	-0.237422
	1.619	-0.238172
	1.619	-0.23704
	1.62	-0.238139
	1.621	-0.237219
	1.622	-0.237979
	1.623	-0.238586
	1.624	-0.238414
	1.624	-0.238613
	1.625	-0.23829
	1.626	-0.238173
	1.627	-0.238679
	1.628	-0.238431
	1.628	-0.238324
	1.629	-0.238742
	1.63	-0.238125
	1.631	-0.238171
	1.632	-0.236139
	1.633	-0.23629
	1.633	-0.235842
	1.634	-0.235743
	1.635	-0.23526
	1.636	-0.236175
	1.637	-0.23768
	1.638	-0.238083
	1.638	-0.238474
	1.639	-0.238936
	1.64	-0.239114
	1.641	-0.240234
	1.642	-0.240474
	1.643	-0.240252
	1.643	-0.240335
	1.644	-0.24031
	1.645	-0.240048
	1.646	-0.240994
	1.647	-0.240751
	1.648	-0.239752
	1.648	-0.239905
	1.649	-0.24047
	1.65	-0.240403
	1.651	-0.240027
	1.652	-0.239979
	1.653	-0.239948
	1.653	-0.239534
	1.654	-0.238527
	1.655	-0.238611
	1.656	-0.239002
	1.657	-0.239469
	1.658	-0.239776
	1.658	-0.240035
	1.659	-0.23967
	1.66	-0.239586
	1.661	-0.239622
	1.662	-0.239507
[truncated: 26,865 more rows]

## Sheet: Supplementary Fig 7a-k
Supplementary Fig 7a
	Voltage (mV)	KCNQ2 WT					100 nM HN37
	-90	0.00446145	0.00180853	6.76894e-06	0.00263778	0.00247256	0.0092363	0.0105612	0.000743021	0.000750696	0.00109915
	-80	0.00488693	0.000652331	0.00474068	0.00293084	0.00429108	0.0416868	0.000806104	0.000882549	0.00387042	0.00248289
	-70	0.00972752	0.000757973	0.0134111	0.0161299	0.0046611	0.0128959	0.0121455	0.0124046	0.00112402	0.0199151
	-60	0.0740225	0.000944624	0.0101389	0.00825393	0.00405139	0.0254556	0.0704295	0.0761973	0.0251857	0.0309855
	-50	0.022001	0.0138175	0.0188416	0.0013808	0.012019	0.0997877	0.205266	0.238035	0.103236	0.160722
	-40	0.0434699	0.0394486	0.0739296	0.0308684	0.0933886	0.266349	0.354666	0.405004	0.270283	0.380378
	-30	0.139003	0.126696	0.20224	0.119006	0.236679	0.444993	0.492836	0.535021	0.462445	0.543013
	-20	0.302541	0.267825	0.402049	0.288487	0.38778	0.598952	0.576803	0.636185	0.61528	0.643417
	-10	0.448865	0.427246	0.562325	0.440416	0.508949	0.696114	0.682677	0.710787	0.714107	0.730779
	0	0.593414	0.576191	0.663052	0.560861	0.599108	0.75039	0.75632	0.777108	0.782713	0.771334
	10	0.674133	0.660395	0.776397	0.660765	0.686696	0.808606	0.821806	0.83382	0.832446	0.807255
	20	0.751903	0.74058	0.839962	0.740806	0.753193	0.859409	0.873741	0.865511	0.86846	0.844036
	30	0.791109	0.811358	0.894564	0.82479	0.798679	0.880699	0.905805	0.901839	0.906295	0.897022
	40	0.852586	0.851409	0.913514	0.895911	0.858323	0.934448	0.9338	0.941254	0.923885	0.915971
	50	0.922042	0.902456	0.948293	0.92183	0.898073	0.951158	0.965686	0.962083	0.961717	0.947255
	60	0.925781	0.964212	0.955218	0.966966	0.940847	0.983218	0.984677	0.981597	0.979014	0.9643
	70	1	1	1	1	1	1	1	1	1	1
Supplementary Fig 7b
	Voltage (mV)	F100A				100 nM HN37
	-100	0.000589265	0.000411444	0.0309249	0.00050205	0.0270054	0.000565211	0.000276088	0.0141954
	-90	0.002787	9.08161e-05	0.002503	0.005864	0.004948	0.001979	0.010025	9.58797e-05
	-80	0.005613	0.00377466	0.012162	0.00497	0.008036	0.01243	0.040933	0.00643691
	-70	0.022928	0.00490648	0.006933	8.17e-05	0.098309	0.09093	0.174421	0.0236337
	-60	0.03376	0.0383942	0.032837	8.66e-05	0.309657	0.286301	0.437862	0.0990287
	-50	0.079143	0.163156	0.146315	0.010914	0.501034	0.483344	0.612681	0.326566
	-40	0.223421	0.355887	0.332735	0.106069	0.600976	0.612166	0.695102	0.549552
	-30	0.435294	0.522014	0.522584	0.312251	0.68291	0.696127	0.764996	0.689865
	-20	0.56878	0.620081	0.630976	0.537298	0.735586	0.745413	0.777818	0.768036
	-10	0.670852	0.711367	0.712459	0.689883	0.775798	0.795718	0.827999	0.803909
	0	0.740885	0.761591	0.770248	0.777602	0.860517	0.830077	0.859685	0.851727
	10	0.812519	0.807521	0.833958	0.855511	0.871799	0.848418	0.887786	0.881672
	20	0.818405	0.845329	0.893232	0.892762	0.883908	0.870112	0.909871	0.90894
	30	0.880325	0.884503	0.917044	0.939092	0.941705	0.899659	0.946011	0.921037
	40	0.948817	0.915898	0.946194	0.945163	0.947249	0.915399	0.942414	0.953894
	50	0.955226	0.921922	0.975102	0.980702	0.966014	0.939213	0.973199	0.965933
	60	0.976529	0.963445	0.98819	0.986465	0.979059	0.971768	0.979044	0.982513
	70	1	1	1	1	1	1	1	1
Supplementary Fig 7c
	Voltage (mV)	M211A				100 nM HN37
	-90	0.000455	0.020994	0.00158	8.5e-05	0.00431198	0.003023	0.000142921	0.001277
	-80	0.000541	0.002291	0.000264	0.003139	0.00155923	0.001073	0.00252592	0.004049
	-70	0.002404	0.011016	0.001679	0.00077	0.00278819	0.002103	3.38864e-05	0.000127
	-60	0.043893	0.016586	0.002356	0.002215	5.22009e-05	0.005457	0.00205541	0.002822
	-50	0.001491	0.010964	0.00486	0.000112	0.0106503	0.02103	0.0412153	0.057021
	-40	0.000582	0.024796	0.012843	0.015215	0.0691139	0.083299	0.0743273	0.064837
	-30	0.02127	0.02496	0.072049	0.092448	0.198867	0.040753	0.0432665	0.265216
	-20	0.110412	0.06434	0.192272	0.259045	0.347473	0.212064	0.267526	0.447454
	-10	0.278622	0.227945	0.333925	0.430146	0.494994	0.387832	0.41363	0.576176
	0	0.458582	0.463594	0.454819	0.566693	0.610785	0.584307	0.554938	0.652019
	10	0.592896	0.623837	0.570743	0.657909	0.697793	0.703576	0.671039	0.794819
	20	0.709089	0.78896	0.660394	0.724612	0.778316	0.789622	0.755242	0.826105
	30	0.777173	0.855527	0.747124	0.791345	0.871401	0.854212	0.840732	0.864437
	40	0.839741	0.89206	0.821138	0.848068	0.884888	0.901851	0.910102	0.904977
	50	0.916601	0.952304	0.891009	0.896391	0.955277	0.942536	0.987266	0.944399
	60	0.966434	1	0.963808	0.956015	0.974324	1	0.929524	0.965934
	70	1	0.989553	1	1	1	0.980051	1	1
Supplementary Fig 7d
	Voltage (mV)	W236A				100 nM HN37
	-90	0.031699	0.010281	0.009366	0.005388	0.011109	0.005939	0.015625	0.000807
	-80	0.000839	0.005451	0.000703	0.019124	0.000304	0.032075	0.004978	0.001885
	-70	0.005211	0.022103	0.000102	0.013224	0.009715	0.006378	0.016297	0.016339
	-60	0.057294	0.034673	0.03315	0.034088	0.047466	0.042009	0.048405	0.001323
	-50	0.125572	0.067961	0.082393	0.100055	0.141834	0.185919	0.125431	0.102007
	-40	0.262768	0.213259	0.190578	0.224412	0.295263	0.299142	0.201211	0.223129
	-30	0.426245	0.371631	0.34367	0.366807	0.430573	0.362847	0.32713	0.369612
	-20	0.577844	0.508091	0.506564	0.502362	0.572074	0.486896	0.514092	0.528326
	-10	0.698073	0.611738	0.62643	0.622121	0.639789	0.600651	0.622319	0.637821
	0	0.743142	0.734202	0.742975	0.75569	0.71191	0.725392	0.753536	0.752847
	10	0.84389	0.798857	0.791773	0.811267	0.75848	0.785514	0.805422	0.817871
	20	0.863288	0.841073	0.860795	0.856915	0.822781	0.843316	0.877779	0.891583
	30	0.956261	0.890375	0.893335	0.928412	0.868023	0.791683	0.890128	0.922233
	40	0.962308	0.93148	0.951236	0.953965	0.905088	0.935188	0.927462	0.96975
	50	0.970557	0.954653	1	0.977999	0.938166	0.97004	0.95806	0.972855
	60	0.978205	0.984022	0.977824	0.993596	0.99865	0.993193	1	0.990741
	70	1	1	0.991295	1	1	1	0.987135	1
Supplementary Fig 7e
	Voltage (mV)	F240A					100 nM HN37
	-90	0.008977	0.006823	0.010604	0.008733	0.005528	0.002986	0.00438	0.00306	0.000661	0.003001
	-80	0.004921	0.025353	0.012795	0.018787	0.009257	0.004413	0.003365	0.002265	0.002507	0.002017
	-70	0.015053	0.005281	0.011446	0.006645	0.00817	0.009867	0.011019	0.002329	0.006261	0.010489
	-60	0.056743	0.020757	0.00162	0.007081	0.009963	0.001504	0.044841	0.023134	0.01222	0.043545
	-50	0.003125	0.041158	0.020534	0.020875	0.006935	0.092969	0.097362	0.104017	0.056917	0.090784
	-40	0.041853	0.089543	0.01852	0.014413	0.025131	0.253565	0.217171	0.271886	0.195704	0.216867
	-30	0.126532	0.178487	0.104345	0.098937	0.085063	0.465546	0.40177	0.481691	0.354265	0.344105
	-20	0.282963	0.268416	0.28486	0.249188	0.214079	0.606491	0.480355	0.615042	0.528527	0.466043
	-10	0.49395	0.489251	0.514509	0.408705	0.372652	0.628284	0.624907	0.743807	0.651235	0.617405
	0	0.653941	0.677795	0.681316	0.495564	0.551001	0.802628	0.802063	0.802213	0.745591	0.743424
	10	0.741943	0.757233	0.794136	0.649404	0.670536	0.874332	0.837789	0.882913	0.815828	0.801398
	20	0.807324	0.826379	0.884878	0.782546	0.767909	0.891703	0.863433	0.866728	0.881784	0.855454
	30	0.86599	0.870474	0.925001	0.870597	0.820625	0.916647	0.911159	0.952864	0.909456	0.893493
	40	0.87934	0.891703	0.946385	0.93183	0.825683	0.926731	0.935671	0.962259	0.935683	0.924704
	50	0.952808	0.972826	0.953358	0.967927	0.871926	0.957326	0.962457	0.989172	0.950506	0.950944
	60	0.937962	0.995505	0.976947	0.967585	0.973626	0.972812	0.981769	1	0.970992	0.979449
	70	1	1	1	1	1	1	1	0.992612	1	1
Supplementary Fig 7f
	Voltage (mV)	L299A			100 nM HN37
	-90	0.005143	0.016322	0.007472	0.0053694	0.0050701	0.013286
	-80	0.020342	0.023023	0.077816	0.003439	0.017759	0.038757
	-70	0.014341	0.015917	0.05669	0.011914	0.011588	0.006013
	-60	5.38e-05	0.025703	0.045222	0.019287	0.0442	0.010769
	-50	0.053944	0.077719	0.085627	0.071553	0.104485	0.053223
	-40	0.09645	0.13565	0.112948	0.142532	0.142831	0.19209
	-30	0.223796	0.227634	0.270366	0.267802	0.16987	0.325087
	-20	0.376814	0.384125	0.427011	0.503117	0.415395	0.431997
	-10	0.545176	0.431777	0.550967	0.563196	0.556898	0.541965
	0	0.688768	0.567178	0.629641	0.703947	0.70375	0.700479
	10	0.732985	0.696689	0.755285	0.808918	0.775252	0.760761
	20	0.826037	0.715537	0.764671	0.78437	0.834392	0.850939
	30	0.857562	0.777367	0.852099	0.842013	0.826232	0.836119
	40	0.908772	0.877212	0.856583	0.901726	0.942305	0.817211
	50	0.933247	0.860889	0.872813	0.928872	0.931878	0.92769
	60	1	0.976868	0.99409	1	0.936515	0.963806
	70	0.992276	1	1	0.968288	1	1
Supplementary Fig 7g
	Voltage (mV)	W236A					10 nM HN37
	-90	0.00351	0.007581	0.022406	0.068865	0.005468	0.010328	0.040419	0.003213	0.0452	0.000367
	-80	0.007687	0.016905	0.004424	0.079792	0.057338	0.003607	0.011022	0.01684	0.039654	0.00192
	-70	0.008273	0.028037	0.003064	0.132805	0.040209	0.009976	0.011176	0.021655	0.04028	0.017544
	-60	0.024941	0.15355	0.013856	0.163142	0.048327	0.052099	0.002005	0.118504	0.074276	0.081423
	-50	0.08543	0.301867	0.041201	0.254504	0.141002	0.22064	0.101868	0.21018	0.146626	0.203855
	-40	0.180702	0.437033	0.098131	0.330741	0.258154	0.272406	0.236301	0.327233	0.27561	0.330213
	-30	0.317742	0.562691	0.199746	0.392989	0.361021	0.343993	0.374544	0.472426	0.40262	0.443496
	-20	0.448455	0.64832	0.313099	0.490673	0.47648	0.444276	0.527796	0.542484	0.520447	0.532659
	-10	0.549304	0.761227	0.439446	0.60953	0.604271	0.55073	0.623636	0.643811	0.550963	0.610115
	0	0.624472	0.83813	0.557238	0.627062	0.67771	0.629224	0.721185	0.758473	0.712088	0.682932
	10	0.695548	0.884972	0.653268	0.719359	0.74313	0.75051	0.800367	0.795828	0.740646	0.739891
	20	0.771584	0.925844	0.71489	0.779349	0.823106	0.777827	0.864001	0.858912	0.779325	0.793797
	30	0.83744	0.931077	0.797969	0.800329	0.895994	0.817996	0.928236	0.887603	0.843888	0.839455
	40	0.894041	0.938552	0.879919	0.844751	0.902035	0.865839	0.883083	0.967455	0.888182	0.884782
	50	0.942081	0.926762	0.887746	0.914272	0.979239	0.953071	0.943257	1	0.903315	0.933113
	60	0.962811	1	0.933483	0.95056	0.980634	0.96388	0.985392	0.99182	0.97274	0.973171
	70	1	0.921023	1	1	1	1	1	0.989822	1	1
Supplementary Fig 7h
	Voltage (mV)	W236A						100 nM HN37
	-90	0.001664	0.016796	0.010281	0.009366	0.056066	0.005388	0.011109	0.000807	0.015625	0.002454	0.031699	0.005939
	-80	6.41e-05	0.018405	0.005451	0.000703	0.03674	0.019124	0.000304	0.001885	0.004978	0.008519	0.000839	0.032075
	-70	0.005796	0.014618	0.022103	0.000102	0.027713	0.013224	0.009715	0.016339	0.016297	0.025866	0.005211	0.006378
	-60	0.024124	0.083865	0.034673	0.03315	0.051707	0.034088	0.047466	0.001323	0.048405	0.040787	0.057294	0.042009
	-50	0.078875	0.249253	0.067961	0.082393	0.073535	0.080055	0.141834	0.102007	0.125431	0.07295	0.125572	0.185919
	-40	0.195553	0.386376	0.213259	0.190578	0.178271	0.184412	0.295263	0.229	0.241211	0.213105	0.262768	0.299142
	-30	0.32783	0.500534	0.371631	0.34367	0.325535	0.376807	0.430573	0.399612	0.396713	0.338672	0.426245	0.362847
	-20	0.43253	0.583993	0.508091	0.506564	0.467029	0.492362	0.572074	0.548326	0.554092	0.488243	0.577844	0.486896
	-10	0.569429	0.657258	0.611738	0.62643	0.540785	0.622121	0.639789	0.667821	0.662319	0.604561	0.698073	0.600651
	0	0.648553	0.750258	0.734202	0.742975	0.667986	0.71569	0.71191	0.772847	0.753536	0.695801	0.743142	0.625392
	10	0.724425	0.744139	0.798857	0.791773	0.744233	0.772672	0.75848	0.817871	0.805422	0.766724	0.84389	0.685514
	20	0.804206	0.806914	0.841073	0.860795	0.841715	0.806915	0.822781	0.891583	0.917779	0.801127	0.863288	0.743316
	30	0.859554	0.875684	0.890375	0.893335	0.852492	0.928412	0.868023	0.922233	0.940128	0.85545	0.956261	0.791683
	40	0.893149	0.941809	0.93148	0.951236	0.895441	0.893965	0.905088	0.96975	0.927462	0.892066	0.962308	0.835188
	50	0.960476	0.890061	0.954653	1	0.923871	1	0.938166	0.972855	0.95806	0.920044	0.970557	0.87004
	60	0.946201	0.953967	0.984022	0.977824	1	0.993596	0.99865	0.990741	1	1	0.978205	0.913193
	70	1	1	1	0.991295	0.974213	0.977999	1	1	0.987135	0.955193	1	1
Supplementary Fig 7i
	Voltage (mV)	W236A			300 nM HN37
	-90	0.00351	0.068865	0.005468	0.002361	0.052392	0.000485
	-80	0.007687	0.079792	0.057338	0.008323	0.006736	1.74e-05
	-70	0.008273	0.132805	0.040209	0.048381	0.005026	0.005996
	-60	0.024941	0.163142	0.048327	0.0167978	0.00937	0.039399
	-50	0.08543	0.254504	0.141002	0.203614	0.073444	0.102306
	-40	0.180702	0.330741	0.258154	0.35883	0.191765	0.223012
	-30	0.317742	0.392989	0.361021	0.439981	0.353414	0.46717
	-20	0.448455	0.490673	0.47648	0.435183	0.452911	0.487399
	-10	0.549304	0.60953	0.604271	0.610988	0.58928	0.631674
	0	0.624472	0.627062	0.67771	0.69181	0.657163	0.700996
	10	0.695548	0.719359	0.74313	0.751474	0.715425	0.746894
	20	0.771584	0.779349	0.823106	0.877305	0.806635	0.803391
	30	0.83744	0.800329	0.895994	0.946648	0.827389	0.866472
	40	0.894041	0.844751	0.902035	0.94234	0.889582	0.89663
	50	0.942081	0.914272	0.979239	0.917711	0.9025	0.895735
	60	0.962811	0.95056	0.980634	0.949851	0.957495	0.904548
	70	1	1	1	1	1	1
Supplementary Fig 7j
	Voltage (mV)	W236A						1 μM HN37
	-90	0.001664	0.016796	0.010281	0.009366	0.001854	0.056066	0.011109	0.000807	0.015625	0.002454	0.031699	0.005939
	-80	6.41e-05	0.018405	0.005451	0.000703	0.008407	0.03674	0.000304	0.001885	0.004978	0.008519	0.000839	0.032075
	-70	0.005796	0.014618	0.022103	0.000102	0.015312	0.027713	0.009715	0.016339	0.016297	0.025866	0.008777	0.006378
	-60	0.024124	0.083865	0.034673	0.03315	0.059126	0.051707	0.047466	0.001323	0.048405	0.040787	0.057294	0.042009
	-50	0.078875	0.249253	0.067961	0.082393	0.16668	0.073535	0.141834	0.102007	0.125431	0.07295	0.125572	0.185919
	-40	0.195553	0.386376	0.213259	0.190578	0.295992	0.178271	0.295263	0.229	0.241211	0.213105	0.262768	0.299142
	-30	0.32783	0.500534	0.371631	0.34367	0.443976	0.325535	0.430573	0.399612	0.396713	0.338672	0.426245	0.362847
	-20	0.43253	0.583993	0.508091	0.506564	0.533336	0.467029	0.572074	0.548326	0.554092	0.488243	0.577844	0.486896
	-10	0.569429	0.657258	0.611738	0.62643	0.651896	0.540785	0.639789	0.667821	0.662319	0.604561	0.698073	0.600651
	0	0.648553	0.750258	0.734202	0.742975	0.701265	0.667986	0.71191	0.772847	0.753536	0.695801	0.743142	0.625392
	10	0.724425	0.744139	0.798857	0.791773	0.752589	0.744233	0.75848	0.817871	0.805422	0.766724	0.84389	0.685514
	20	0.804206	0.806914	0.841073	0.860795	0.800759	0.841715	0.822781	0.891583	0.917779	0.801127	0.863288	0.743316
	30	0.859554	0.875684	0.890375	0.893335	0.856075	0.852492	0.868023	0.922233	0.940128	0.85545	0.956261	0.791683
	40	0.893149	0.941809	0.93148	0.951236	0.908022	0.895441	0.905088	0.96975	0.927462	0.892066	0.962308	0.835188
	50	0.960476	0.890061	0.954653	1	0.922509	0.923871	0.938166	0.972855	0.95806	0.920044	0.970557	0.87004
	60	0.946201	0.953967	0.984022	0.977824	0.984218	1	0.99865	0.990741	1	1	0.978205	0.913193
	70	1	1	1	0.991295	1	0.974213	1	1	0.987135	0.955193	1	1
Supplementary Fig 7k
	Voltage (mV)	W236A					10 μM HN37
	-90	0.00351	0.007581	0.022406	0.002107	0.005468	0.006293	0.011315	0.035098	0.002609	0.012718
	-80	0.007687	0.016905	0.004424	0.012923	0.057338	0.011597	0.017881	0.010887	0.010315	0.017001
	-70	0.008273	0.028037	0.003064	0.067598	0.040209	0.004124	0.029754	0.001552	0.057059	0.032733
	-60	0.024941	0.15355	0.013856	0.174961	0.048327	0.070271	0.012941	0.058482	0.148261	0.101238
	-50	0.08543	0.301867	0.041201	0.297793	0.141002	0.093906	0.008682	0.130591	0.262668	0.219612
	-40	0.180702	0.437033	0.098131	0.39311	0.258154	0.234444	0.08936	0.26959	0.354434	0.332091
	-30	0.317742	0.562691	0.199746	0.460262	0.361021	0.37961	0.210914	0.421676	0.445966	0.403219
	-20	0.448455	0.64832	0.313099	0.501562	0.47648	0.512625	0.343075	0.559125	0.506975	0.500107
	-10	0.549304	0.761227	0.439446	0.542104	0.604271	0.644266	0.43204	0.686855	0.570951	0.589231
	0	0.624472	0.83813	0.557238	0.591424	0.67771	0.75909	0.534059	0.746943	0.634405	0.655163
	10	0.695548	0.884972	0.653268	0.655475	0.74313	0.821647	0.598843	0.744028	0.681738	0.650973
	20	0.771584	0.925844	0.71489	0.704703	0.823106	0.885764	0.684486	0.88502	0.721224	0.761272
	30	0.83744	0.931077	0.797969	0.770295	0.895994	0.931481	0.804911	0.885071	0.769538	0.808774
	40	0.894041	0.938552	0.879919	0.829389	0.902035	0.97613	0.834175	0.933048	0.830358	0.761425
	50	0.942081	0.926762	0.887746	0.899032	0.979239	0.949548	0.926557	0.924557	0.892959	0.808791
	60	0.962811	1	0.933483	0.958737	0.980634	0.982921	0.95072	1	0.950585	0.950897
	70	1	0.921023	1	1	1	1	1	0.988549	1	1

## Sheet: Supplementary Fig 8a
	Elution volume (ml)	mAU
	0	-0.0225807
	0.001	-0.0229777
	0.002	-0.0237525
	0.003	-0.0239904
	0.004	-0.0246897
	0.005	-0.0256025
	0.006	-0.0264735
	0.006	-0.0273627
	0.007	-0.0278498
	0.008	-0.028691
	0.009	-0.0288264
	0.01	-0.0297902
	0.011	-0.0302252
	0.012	-0.0311913
	0.013	-0.0317051
	0.014	-0.031749
	0.015	-0.0318117
	0.016	-0.0321888
	0.017	-0.0319569
	0.017	-0.0311921
	0.018	-0.0315531
	0.019	-0.0322091
	0.02	-0.0333658
	0.021	-0.0337785
	0.022	-0.0344711
	0.023	-0.0344407
	0.024	-0.0350959
	0.025	-0.0360225
	0.026	-0.0360354
	0.027	-0.0360705
	0.028	-0.0368418
	0.028	-0.0380299
	0.029	-0.0388517
	0.03	-0.0400801
	0.031	-0.0397534
	0.032	-0.0411061
	0.033	-0.0423012
	0.034	-0.0443524
	0.035	-0.0455509
	0.036	-0.0472957
	0.037	-0.0492307
	0.038	-0.0506379
	0.038	-0.0516185
	0.039	-0.0521103
	0.04	-0.0544047
	0.041	-0.0555191
	0.042	-0.0568743
	0.043	-0.0578028
	0.044	-0.0597438
	0.045	-0.0601904
	0.046	-0.061674
	0.047	-0.0632266
	0.048	-0.0647398
	0.049	-0.0665714
	0.049	-0.0673982
	0.05	-0.0682668
	0.051	-0.0691012
	0.052	-0.0704402
	0.053	-0.0722551
	0.054	-0.0741555
	0.055	-0.0764517
	0.056	-0.0775613
	0.057	-0.0789054
	0.058	-0.0791177
	0.059	-0.0751761
	0.06	-0.0622269
	0.06	-0.0374724
	0.061	-0.0069163
	0.062	0.02863
	0.063	0.066586
	0.064	0.105037
	0.065	0.144113
	0.066	0.183899
	0.067	0.222558
	0.068	0.262692
	0.069	0.304651
	0.07	0.348752
	0.07	0.39241
	0.071	0.433031
	0.072	0.47098
	0.073	0.509876
	0.074	0.546883
	0.075	0.581757
	0.076	0.61641
	0.077	0.648023
	0.078	0.678735
	0.079	0.707268
	0.08	0.735826
	0.081	0.763185
	0.081	0.791144
	0.082	0.817373
	0.083	0.840346
	0.084	0.861244
	0.085	0.882036
	0.086	0.902777
	0.087	0.921539
	0.088	0.939146
	0.089	0.957856
	0.09	0.977305
	0.091	0.997442
	0.092	1.01875
	0.092	1.03922
	0.093	1.0589
	0.094	1.07833
	0.095	1.09925
	0.096	1.12292
	0.097	1.14614
	0.098	1.16868
	0.099	1.1923
	0.1	1.21501
	0.101	1.23665
	0.102	1.258
	0.102	1.27986
	0.103	1.29998
	0.104	1.31656
	0.105	1.32585
	0.106	1.32455
	0.107	1.31692
	0.108	1.30236
	0.109	1.2853
	0.11	1.26666
	0.111	1.24774
	0.112	1.22763
	0.113	1.20541
	0.113	1.18304
	0.114	1.1583
	0.115	1.13134
	0.116	1.10536
	0.117	1.07991
	0.118	1.05603
	0.119	1.03246
	0.12	1.01082
	0.121	0.989835
	0.122	0.969134
	0.123	0.951832
	0.124	0.934281
	0.124	0.919709
	0.125	0.904831
	0.126	0.889712
	0.127	0.873812
	0.128	0.860859
	0.129	0.851219
	0.13	0.842528
	0.131	0.832956
	0.132	0.822727
	0.133	0.813087
	0.134	0.804435
	0.134	0.79482
	0.135	0.785344
	0.136	0.774372
	0.137	0.761728
	0.138	0.749039
	0.139	0.736434
	0.14	0.724095
	0.141	0.710125
	0.142	0.693549
	0.143	0.676626
	0.144	0.660982
	0.145	0.645349
	0.145	0.630341
	0.146	0.616167
	0.147	0.602161
	0.148	0.586605
	0.149	0.571376
	0.15	0.55572
	0.151	0.537596
	0.152	0.518366
	0.153	0.499789
	0.154	0.48259
	0.155	0.465286
	0.156	0.447822
	0.156	0.430355
	0.157	0.413847
	0.158	0.399994
	0.159	0.386333
	0.16	0.372692
	0.161	0.358561
	0.162	0.343338
	0.163	0.329774
	0.164	0.317567
	0.165	0.305202
	0.166	0.292651
	0.166	0.280308
	0.167	0.268142
	0.168	0.25552
	0.169	0.24438
	0.17	0.233559
	0.171	0.223208
	0.172	0.213495
	0.173	0.204274
	0.174	0.195081
	0.175	0.185392
	0.176	0.176359
	0.177	0.167467
	0.177	0.159473
	0.178	0.152831
	0.179	0.145819
	0.18	0.138545
	0.181	0.131154
	0.182	0.124754
	0.183	0.119164
	0.184	0.114002
	0.185	0.109242
	0.186	0.104552
	0.187	0.0999106
	0.188	0.0956128
	0.188	0.0911524
	0.189	0.0862192
	0.19	0.0806095
	0.191	0.0750997
	0.192	0.0703769
	0.193	0.0658279
	0.194	0.0626043
	0.195	0.0601069
	0.196	0.057044
	0.197	0.0544986
	0.198	0.0520783
	0.198	0.0491678
	0.199	0.0464832
	0.2	0.0438059
	0.201	0.0415802
	0.202	0.0401808
	0.203	0.0385177
	0.204	0.0371744
	0.205	0.0357431
	0.206	0.0336008
	0.207	0.0323672
	0.208	0.0325872
	0.209	0.0325819
	0.209	0.0319315
	0.21	0.031283
	0.211	0.0303998
	0.212	0.0295839
	0.213	0.0294538
	0.214	0.0295164
	0.215	0.0294964
	0.216	0.0288231
	0.217	0.0278408
	0.218	0.0275146
	0.219	0.0277028
	0.22	0.0276263
	0.22	0.0276046
	0.221	0.0277268
	0.222	0.0278373
	0.223	0.0283853
	0.224	0.0287634
	0.225	0.0293567
	0.226	0.0306302
	0.227	0.0318214
	0.228	0.0333213
	0.229	0.0352167
	0.23	0.0368591
	0.23	0.038693
	0.231	0.040954
	0.232	0.0432623
	0.233	0.0456568
	0.234	0.0486878
	0.235	0.0523244
	0.236	0.0559799
	0.237	0.0594245
	0.238	0.0627507
	0.239	0.0662684
	0.24	0.0697241
	0.241	0.0725861
	0.241	0.076119
	0.242	0.0801369
	0.243	0.0841098
	0.244	0.0889459
	0.245	0.0930709
	0.246	0.0969817
	0.247	0.102032
	0.248	0.106806
	0.249	0.11069
	0.25	0.114675
	0.251	0.118587
	0.252	0.123006
	0.252	0.12753
	0.253	0.131524
	0.254	0.135635
	0.255	0.139755
	0.256	0.144511
	0.257	0.14934
	0.258	0.15457
	0.259	0.158463
	0.26	0.162799
	0.261	0.167593
	0.262	0.172374
	0.262	0.17788
	0.263	0.18253
	0.264	0.18659
	0.265	0.191076
	0.266	0.195464
	0.267	0.19966
	0.268	0.204068
	0.269	0.208356
	0.27	0.212205
	0.271	0.216611
	0.272	0.221047
	0.273	0.226343
	0.273	0.233082
	0.274	0.239297
	0.275	0.243646
	0.276	0.246867
	0.277	0.250201
	0.278	0.253842
	0.279	0.256504
	0.28	0.258473
	0.281	0.260383
	0.282	0.262379
	0.283	0.26429
	0.284	0.266143
	0.284	0.268006
	0.285	0.268859
	0.286	0.269373
	0.287	0.270012
	0.288	0.271165
	0.289	0.271862
	0.29	0.271854
	0.291	0.272669
	0.292	0.273783
	0.293	0.274193
	0.294	0.274328
	0.295	0.275335
	0.295	0.276083
	0.296	0.276926
	0.297	0.276873
	0.298	0.276061
	0.299	0.275455
	0.3	0.275174
	0.301	0.275075
	0.302	0.274286
	0.303	0.274843
	0.304	0.274704
	0.305	0.274334
	0.305	0.274089
	0.306	0.274234
	0.307	0.273358
	0.308	0.271744
	0.309	0.270603
	0.31	0.269415
	0.311	0.268619
	0.312	0.267892
	0.313	0.266986
	0.314	0.266649
	0.315	0.266293
	0.316	0.265928
	0.316	0.264136
	0.317	0.261692
	0.318	0.259462
	0.319	0.254364
	0.32	0.249316
	0.321	0.245616
	0.322	0.243062
	0.323	0.240846
	0.324	0.237665
	0.325	0.235246
	0.326	0.233242
	0.327	0.230573
	0.327	0.227565
	0.328	0.224544
	0.329	0.222577
	0.33	0.219246
	0.331	0.216631
	0.332	0.214007
	0.333	0.211925
	0.334	0.209574
	0.335	0.207208
	0.336	0.204592
	0.337	0.201546
	0.337	0.198778
	0.338	0.195532
	0.339	0.191694
	0.34	0.188652
	0.341	0.185192
	0.342	0.181993
	0.343	0.180208
	0.344	0.178814
	0.345	0.176119
	0.346	0.173073
	0.347	0.17121
	0.348	0.168403
	0.348	0.164677
	0.349	0.16099
	0.35	0.159068
	0.351	0.156879
	0.352	0.153431
	0.353	0.151647
	0.354	0.15003
	0.355	0.14756
	0.356	0.146022
	0.357	0.144825
	0.358	0.142527
	0.359	0.141412
	0.359	0.138411
	0.36	0.135756
	0.361	0.133423
	0.362	0.130871
	0.363	0.129283
	0.364	0.128493
	0.365	0.126463
	0.366	0.125097
	0.367	0.12443
	0.368	0.123467
	0.369	0.121784
	0.369	0.120149
	0.37	0.11943
	0.371	0.118367
	0.372	0.117684
	0.373	0.116284
	0.374	0.116059
	0.375	0.114259
	0.376	0.114252
	0.377	0.112683
	0.378	0.112586
	0.379	0.111806
	0.38	0.109983
	0.38	0.10906
	0.381	0.108934
	0.382	0.108795
	0.383	0.107747
	0.384	0.107042
	0.385	0.107665
	0.386	0.107288
	0.387	0.10752
	0.388	0.107176
	0.389	0.106156
	0.39	0.105804
	0.391	0.105516
	0.391	0.105597
	0.392	0.105694
	0.393	0.106633
	0.394	0.106532
	0.395	0.106685
	0.396	0.10621
	0.397	0.106793
	0.398	0.107301
	0.399	0.106351
	0.4	0.106318
	0.401	0.107671
	0.401	0.10898
	0.402	0.108004
	0.403	0.108774
	0.404	0.109001
	0.405	0.109799
	0.406	0.110894
	0.407	0.111889
	0.408	0.112976
	0.409	0.114124
	0.41	0.113655
	0.411	0.115326
	0.412	0.116653
	0.412	0.117263
	0.413	0.118162
	0.414	0.119139
	0.415	0.120189
	0.416	0.121719
	0.417	0.122441
	0.418	0.122906
	0.419	0.123637
	0.42	0.124885
	0.421	0.125855
	0.422	0.126926
	0.423	0.128874
	0.423	0.129367
	0.424	0.13098
	0.425	0.133053
	0.426	0.135173
	0.427	0.136668
	0.428	0.137423
	0.429	0.139559
	0.43	0.141584
	0.431	0.142027
	0.432	0.142976
	0.433	0.143372
	0.433	0.14491
	0.434	0.146391
	0.435	0.146637
	0.436	0.148589
	0.437	0.150323
	0.438	0.152442
	0.439	0.15385
	0.44	0.155624
	0.441	0.156454
	0.442	0.158312
	0.443	0.159401
	0.444	0.160359
	0.444	0.162003
	0.445	0.16399
	0.446	0.166221
	0.447	0.16581
	0.448	0.168278
	0.449	0.169467
	0.45	0.170547
	0.451	0.17201
	0.452	0.172928
	0.453	0.173458
	0.454	0.174258
	0.455	0.175309
	0.455	0.175691
	0.456	0.175597
	0.457	0.175383
	0.458	0.175125
	0.459	0.175526
	0.46	0.176234
	0.461	0.177459
	0.462	0.177089
	0.463	0.177509
	0.464	0.178984
	0.465	0.180115
	0.465	0.180349
	0.466	0.180501
	0.467	0.180499
	0.468	0.180404
	0.469	0.181073
	0.47	0.181119
	0.471	0.180381
	0.472	0.179314
	0.473	0.177942
	0.474	0.177846
	0.475	0.177189
	0.476	0.176657
	0.476	0.176386
	0.477	0.176342
	0.478	0.175728
	0.479	0.175795
	0.48	0.175225
	0.481	0.175545
	0.482	0.175363
	0.483	0.174757
	0.484	0.173438
	0.485	0.172327
	0.486	0.171266
	0.487	0.170968
	0.487	0.170235
	0.488	0.170069
	0.489	0.169952
	0.49	0.169004
	0.491	0.167826
	0.492	0.165178
	0.493	0.165123
	0.494	0.163511
	0.495	0.162184
	0.496	0.161103
	0.497	0.159433
	0.497	0.15878
	0.498	0.157845
	0.499	0.156806
	0.5	0.15616
	0.501	0.155989
	0.502	0.155362
	0.503	0.154857
	0.504	0.154294
	0.505	0.15332
	0.506	0.152211
	0.507	0.1509
	0.508	0.150008
	0.508	0.149385
	0.509	0.148017
	0.51	0.146592
	0.511	0.145725
	0.512	0.145044
	0.513	0.143849
	0.514	0.142249
	0.515	0.140947
	0.516	0.140374
	0.517	0.13975
	0.518	0.139183
	0.519	0.138708
	0.519	0.137587
	0.52	0.136314
	0.521	0.13528
	0.522	0.134902
	0.523	0.133768
	0.524	0.133162
	0.525	0.132705
	0.526	0.132549
	0.527	0.132288
	0.528	0.131569
	0.529	0.130319
	0.529	0.128781
	0.53	0.127919
	0.531	0.126813
	0.532	0.125367
	0.533	0.123532
	0.534	0.121354
	0.535	0.119513
	0.536	0.118772
	0.537	0.117433
	0.538	0.11658
	0.539	0.115369
	0.54	0.114289
	0.54	0.113499
	0.541	0.112527
	0.542	0.112258
	0.543	0.111701
	0.544	0.110237
	0.545	0.109043
	0.546	0.107667
	0.547	0.106664
	0.548	0.106007
	0.549	0.104742
	0.55	0.103602
	0.551	0.103231
	0.551	0.101978
	0.552	0.100358
	0.553	0.0993476
	0.554	0.0982388
	0.555	0.0973996
	0.556	0.0969868
	0.557	0.0967874
	0.558	0.0965429
	0.559	0.095958
	0.56	0.0955194
	0.561	0.094866
	0.562	0.0931625
	0.562	0.0918787
	0.563	0.0910006
	0.564	0.0897591
	0.565	0.0883897
	0.566	0.0872833
	0.567	0.0867699
	0.568	0.085811
	0.569	0.0851325
	0.57	0.084817
	0.571	0.0832045
	0.572	0.081011
	0.572	0.079443
	0.573	0.0783616
	0.574	0.0779197
	0.575	0.0776915
	0.576	0.0767843
	0.577	0.0763898
	0.578	0.0762799
	0.579	0.0761111
	0.58	0.0762989
	0.581	0.0760832
	0.582	0.0756016
	0.583	0.0752349
	0.583	0.0749082
	0.584	0.0747115
	0.585	0.0745212
	0.586	0.0734001
	0.587	0.0720843
	0.588	0.0709381
	0.589	0.0697654
	0.59	0.0692849
	0.591	0.0692941
	0.592	0.0695269
	0.593	0.0689606
	0.594	0.0678381
	0.594	0.0677987
	0.595	0.0684276
	0.596	0.0679516
	0.597	0.0675806
	0.598	0.0678609
	0.599	0.0674823
	0.6	0.0663166
	0.601	0.0652559
	0.602	0.064517
	0.603	0.0632852
	0.604	0.0618516
	0.604	0.0611406
	0.605	0.0600908
	0.606	0.0588656
	0.607	0.0585416
	0.608	0.0579639
	0.609	0.0576038
	0.61	0.0578029
	0.611	0.0579729
	0.612	0.0579464
	0.613	0.0574499
	0.614	0.0571552
	0.615	0.0566198
	0.615	0.055544
	0.616	0.0548524
	0.617	0.0545974
	0.618	0.0546224
	0.619	0.0540646
	0.62	0.0534304
	0.621	0.0532543
	0.622	0.0534522
	0.623	0.0529157
	0.624	0.0518984
	0.625	0.051764
	0.626	0.0513465
	0.626	0.0511859
	0.627	0.0508052
	0.628	0.049927
	0.629	0.0498236
	0.63	0.0489207
	0.631	0.048119
	0.632	0.0479441
	0.633	0.0478594
	0.634	0.0476924
	0.635	0.0471531
	0.636	0.0466457
	0.636	0.0458457
	0.637	0.0444669
	0.638	0.0430915
	0.639	0.043174
	0.64	0.0426026
	0.641	0.0414793
	0.642	0.0408092
	0.643	0.0407176
	0.644	0.0398864
	0.645	0.0400512
	0.646	0.040304
	0.647	0.0402896
	0.647	0.04051
	0.648	0.0418989
	0.649	0.0424361
	0.65	0.0424228
	0.651	0.0425466
	0.652	0.0428984
	0.653	0.0427182
	0.654	0.0422058
	0.655	0.0420051
	0.656	0.0414743
	0.657	0.0411802
	0.658	0.0413444
	0.658	0.0411391
	0.659	0.0405909
	0.66	0.0404727
	0.661	0.0404065
	0.662	0.0409336
	0.663	0.0414309
	0.664	0.0411251
	0.665	0.0411786
	0.666	0.0409416
	0.667	0.0406887
	0.668	0.0396965
	0.668	0.0389935
	0.669	0.0396195
	0.67	0.039539
	0.671	0.0391896
	0.672	0.0383977
	0.673	0.0372983
	0.674	0.0375989
	0.675	0.036836
	0.676	0.0368082
	0.677	0.0366292
	0.678	0.0360035
	0.679	0.0365202
	0.679	0.0360814
	0.68	0.0361874
	0.681	0.0361743
	0.682	0.0358511
	0.683	0.0352764
	0.684	0.0357168
	0.685	0.0355606
	0.686	0.0359342
	0.687	0.0369478
	0.688	0.037269
	0.689	0.0371576
	0.69	0.0385062
	0.69	0.0380349
	0.691	0.0376315
	0.692	0.0377822
	0.693	0.0370781
	0.694	0.0361978
	0.695	0.035468
	0.696	0.0353619
	0.697	0.0350013
	0.698	0.0348091
	0.699	0.0352359
	0.7	0.0354617
	0.7	0.0359397
	0.701	0.035631
	0.702	0.0357259
	0.703	0.0356673
	0.704	0.0355968
	0.705	0.0355705
	0.706	0.0353332
	0.707	0.0357189
	0.708	0.0355045
	0.709	0.0346697
	0.71	0.0345571
	0.711	0.0346018
	0.711	0.0350028
	0.712	0.0348072
	0.713	0.0345923
	0.714	0.0344529
	0.715	0.0343769
	0.716	0.0344273
	0.717	0.0343702
	0.718	0.0337716
	0.719	0.0346338
	0.72	0.0351249
	0.721	0.0352085
	0.722	0.0351348
	0.722	0.035216
	0.723	0.0345419
	0.724	0.0335174
	0.725	0.0332807
	0.726	0.0335437
	0.727	0.0332833
	0.728	0.033649
	0.729	0.0345497
	0.73	0.0347757
	0.731	0.0348941
	0.732	0.0351215
	0.732	0.0338953
	0.733	0.0331309
	0.734	0.0326083
	0.735	0.0312432
	0.736	0.0317154
	0.737	0.0312502
	0.738	0.031044
	0.739	0.0312994
	0.74	0.0312871
	0.741	0.0312096
	0.742	0.0309515
	0.743	0.0307363
	0.743	0.0313618
	0.744	0.0301245
	0.745	0.0297742
	0.746	0.0296183
	0.747	0.029395
	0.748	0.0287378
	0.749	0.0278664
	0.75	0.0278151
	0.751	0.0272489
	0.752	0.0273839
	0.753	0.0272644
	0.754	0.0267942
	0.754	0.0267216
	0.755	0.026381
	0.756	0.0262612
	0.757	0.0257323
	0.758	0.0246493
	0.759	0.0243689
	0.76	0.0247236
	0.761	0.0240782
	0.762	0.0236491
	0.763	0.0231588
	0.764	0.0238061
	0.764	0.0239018
	0.765	0.0238007
	0.766	0.0241031
	0.767	0.0242483
	0.768	0.0246243
	0.769	0.0254535
	0.77	0.026019
	0.771	0.0263483
	0.772	0.0258245
	0.773	0.0260636
	0.774	0.0264778
	0.775	0.0263639
	0.775	0.0257116
	0.776	0.0254332
	0.777	0.0251297
	0.778	0.024568
	0.779	0.0237386
	0.78	0.0238355
	0.781	0.0230883
	0.782	0.0218176
	0.783	0.021388
	0.784	0.0210546
	0.785	0.0211979
	0.786	0.0202397
	0.786	0.0194814
	0.787	0.0199293
	0.788	0.0199379
	0.789	0.0189687
	0.79	0.0196922
	0.791	0.0205593
	0.792	0.020076
	0.793	0.0196025
	0.794	0.0197513
	0.795	0.0194293
	0.796	0.0194231
	0.797	0.0194084
	0.797	0.0193195
	0.798	0.0199348
	0.799	0.0203232
	0.8	0.0205272
	0.801	0.0212205
	0.802	0.0215951
	0.803	0.0212646
	0.804	0.0219386
	0.805	0.0223205
	0.806	0.0216576
	0.807	0.0220131
	0.807	0.0220756
	0.808	0.0231744
	0.809	0.0228832
	0.81	0.0223021
	0.811	0.0220879
	0.812	0.0212571
	0.813	0.0209657
	0.814	0.0199808
	0.815	0.0193754
	0.816	0.0192405
	0.817	0.0193733
	0.818	0.0190583
	0.818	0.0180468
	0.819	0.0182454
	0.82	0.0185943
	0.821	0.019524
	0.822	0.0194583
	0.823	0.0198156
	0.824	0.020149
	0.825	0.0211365
	0.826	0.021149
	0.827	0.0213966
	0.828	0.0217633
	0.829	0.0217374
	0.829	0.0215014
	0.83	0.0216878
	0.831	0.0216489
	0.832	0.0216504
	0.833	0.0213013
	0.834	0.021793
	0.835	0.022633
	0.836	0.0228924
	0.837	0.0226715
	0.838	0.0219924
	0.839	0.022063
	0.839	0.022068
	0.84	0.0226836
	0.841	0.0226246
	0.842	0.0225572
	0.843	0.0228457
	0.844	0.0222244
	0.845	0.0218123
	0.846	0.0223198
	0.847	0.0224385
	0.848	0.0223992
	0.849	0.0222088
	0.85	0.022006
	0.85	0.0223031
	0.851	0.0230446
	0.852	0.0232237
	0.853	0.0226805
	0.854	0.0216268
	0.855	0.0211107
	0.856	0.0204315
	0.857	0.0201524
	0.858	0.0206514
	0.859	0.0203845
	0.86	0.0197113
	0.861	0.0197867
	0.861	0.0194375
	0.862	0.018738
	0.863	0.0189825
	0.864	0.0193432
	0.865	0.0195761
	0.866	0.0186392
	0.867	0.0174557
	0.868	0.0171636
	0.869	0.0169223
	0.87	0.0171648
	0.871	0.016597
	0.871	0.0163414
	0.872	0.0161208
	0.873	0.0164801
	0.874	0.0168006
	0.875	0.0173569
	0.876	0.017559
	0.877	0.0180611
	0.878	0.0186275
	0.879	0.0190988
	0.88	0.0188673
	0.881	0.0187179
	0.882	0.0183613
	0.882	0.0182744
	0.883	0.0186043
	0.884	0.0189082
	0.885	0.019456
	0.886	0.0194613
	0.887	0.0189139
	0.888	0.0192565
	0.889	0.0191912
	0.89	0.0192608
	0.891	0.0188559
	0.892	0.0181097
	0.893	0.0179113
	0.893	0.0179312
	0.894	0.018225
	0.895	0.0186165
	0.896	0.0182906
	0.897	0.0181179
	0.898	0.0179387
	0.899	0.0184909
	0.9	0.0191284
	0.901	0.0202256
	0.902	0.0211974
	0.903	0.0215733
	0.903	0.0214841
	0.904	0.021713
	0.905	0.0222269
	0.906	0.0232217
	0.907	0.0236039
	0.908	0.0241411
	0.909	0.0246422
	0.91	0.0250144
	0.911	0.0247983
	0.912	0.025437
	0.913	0.0262982
	0.914	0.0266926
	0.914	0.0264904
	0.915	0.0266186
	0.916	0.0267699
	0.917	0.0267199
	0.918	0.0273932
	0.919	0.0276564
	0.92	0.0279125
	0.921	0.0284033
	0.922	0.0284773
	0.923	0.0283459
	0.924	0.0276051
	0.925	0.0276265
	0.925	0.028078
	0.926	0.0282682
	0.927	0.0288688
	0.928	0.0297209
	0.929	0.0308478
	0.93	0.0310071
	0.931	0.0310901
	0.932	0.0318046
	0.933	0.0327393
	0.934	0.0331881
	0.935	0.0336383
	0.935	0.0342015
	0.936	0.0343303
	0.937	0.0347308
	0.938	0.0350031
	0.939	0.035029
	0.94	0.0347237
	0.941	0.0343046
	0.942	0.0342228
	0.943	0.0341229
	0.944	0.0336627
	0.945	0.0335386
	0.946	0.0335085
	0.946	0.032991
	0.947	0.0329822
	0.948	0.0336483
	0.949	0.0334765
	0.95	0.0333036
	0.951	0.0337286
	0.952	0.0336769
	0.953	0.0333071
	0.954	0.0331929
	0.955	0.0330506
	0.956	0.0329332
	0.957	0.0325841
	0.957	0.0321628
	0.958	0.0319591
	0.959	0.0317554
	0.96	0.0318009
	0.961	0.0321463
	0.962	0.0329218
	0.963	0.0337976
	0.964	0.0336472
	0.965	0.03336
	0.966	0.0332542
	0.967	0.0327787
	0.967	0.0322725
	0.968	0.0315562
	0.969	0.0315055
	0.97	0.0317585
	0.971	0.0313828
	0.972	0.0304732
	0.973	0.0294794
	0.974	0.0285383
	0.975	0.0277185
	0.976	0.0275791
	0.977	0.0271686
	0.978	0.0269638
	0.978	0.0269832
	0.979	0.0264424
	0.98	0.0255802
	0.981	0.0250637
	0.982	0.0250153
	0.983	0.0248908
	0.984	0.0246433
	0.985	0.0242784
	0.986	0.0238047
	0.987	0.0236485
	0.988	0.0236239
	0.989	0.023772
	0.989	0.0244031
	0.99	0.0250112
	0.991	0.0256237
	0.992	0.0263068
	0.993	0.0263463
	0.994	0.0259492
	0.995	0.0261642
	0.996	0.026369
	0.997	0.0262728
	0.998	0.0259364
	0.999	0.025946
	0.999	0.0262397
	1	0.025833
	1.001	0.0255327
	1.002	0.0253936
	1.003	0.0249621
	1.004	0.0251425
	1.005	0.0257746
	1.006	0.025492
	1.007	0.0245141
	1.008	0.0237194
	1.009	0.0230335
	1.01	0.0232286
	1.01	0.023998
	1.011	0.0244498
	1.012	0.0240937
	1.013	0.0236508
	1.014	0.0236674
	1.015	0.0236333
	1.016	0.0234061
	1.017	0.0227616
	1.018	0.0230202
	1.019	0.0234173
	1.02	0.0233174
	1.021	0.0232844
	1.021	0.0234172
	1.022	0.0235901
	1.023	0.0236165
	1.024	0.0233073
	1.025	0.0234362
	1.026	0.0233389
	1.027	0.0235457
	1.028	0.0240371
	1.029	0.0245043
	1.03	0.0244183
	1.031	0.0247266
	1.031	0.0247293
	1.032	0.0248194
	1.033	0.0247305
	1.034	0.0242408
	1.035	0.0235672
	1.036	0.0222956
	1.037	0.0206841
	1.038	0.01981
	1.039	0.0195954
	1.04	0.0189792
	1.041	0.0184736
	1.042	0.0175845
	1.042	0.0164752
	1.043	0.0167858
	1.044	0.0172154
	1.045	0.0168998
	1.046	0.0170771
	1.047	0.0172101
	1.048	0.0178363
	1.049	0.0175071
	1.05	0.0168022
	1.051	0.0162205
	1.052	0.0165727
	1.053	0.016848
	1.053	0.0175259
	1.054	0.0177135
	1.055	0.0182835
	1.056	0.017781
	1.057	0.0167908
	1.058	0.0160495
	1.059	0.0158012
	1.06	0.0154631
	1.061	0.015507
	1.062	0.0152076
	1.063	0.0157649
	1.064	0.0152786
	1.064	0.0154191
	1.065	0.0148163
	1.066	0.0149033
	1.067	0.0146489
	1.068	0.0144426
	1.069	0.0136894
	1.07	0.0130337
	1.071	0.0124977
	1.072	0.0125862
	1.073	0.0121419
	1.074	0.0112765
	1.074	0.00990114
	1.075	0.00933483
	1.076	0.00892673
	1.077	0.00856421
	1.078	0.00859886
	1.079	0.00852306
	1.08	0.00919937
	1.081	0.00952015
	1.082	0.00973292
	1.083	0.00960295
	1.084	0.00982888
	1.085	0.00954624
	1.085	0.00931431
	1.086	0.00935948
	1.087	0.00973834
	1.088	0.0101817
	1.089	0.00988774
	1.09	0.00875506
	1.091	0.00812606
	1.092	0.00843487
	1.093	0.00899452
	1.094	0.00831693
	1.095	0.0094358
	1.096	0.00985125
	1.096	0.00983002
	1.097	0.009482
	1.098	0.00976772
	1.099	0.00884798
	1.1	0.00829981
	1.101	0.00862602
	1.102	0.00895602
	1.103	0.0086331
	1.104	0.0102164
	1.105	0.0120236
	1.106	0.0118281
	1.106	0.0121939
	1.107	0.0113783
	1.108	0.0107647
	1.109	0.0117416
	1.11	0.0119733
	1.111	0.0129003
	1.112	0.0123413
	1.113	0.0114607
	1.114	0.0117162
	1.115	0.0117109
	1.116	0.0123489
	1.117	0.0120616
	1.117	0.0120188
	1.118	0.0120044
	1.119	0.0128682
	1.12	0.0138543
	1.121	0.015129
	1.122	0.0141261
	1.123	0.0143269
	1.124	0.0149205
	1.125	0.0156903
	1.126	0.0154306
	1.127	0.0149369
	1.128	0.0150276
	1.128	0.0157478
	1.129	0.0152012
	1.13	0.0149106
	1.131	0.0153325
	1.132	0.014628
	1.133	0.0142205
	1.134	0.0143091
	1.135	0.0141256
	1.136	0.013781
	1.137	0.013667
	1.138	0.0125078
	1.138	0.0121638
	1.139	0.0116729
	1.14	0.0113249
	1.141	0.0111091
	1.142	0.0109422
	1.143	0.0108593
	1.144	0.0105332
	1.145	0.0103343
	1.146	0.0104247
	1.147	0.00912454
	1.148	0.00856066
	1.149	0.00908715
	1.149	0.00840753
	1.15	0.00717681
	1.151	0.00683521
	1.152	0.00624893
	1.153	0.00703913
	1.154	0.0071208
	1.155	0.00733426
	1.156	0.00699715
	1.157	0.00746813
	1.158	0.0078395
	1.159	0.00835151
	1.16	0.00819955
	1.16	0.00865861
	1.161	0.00812925
	1.162	0.00804113
	1.163	0.00793681
	1.164	0.00813144
	1.165	0.00750605
	1.166	0.00748184
	1.167	0.00728695
	1.168	0.00775197
	1.169	0.00791462
	1.17	0.00645798
	1.17	0.00530934
	1.171	0.00504073
	1.172	0.00453771
	1.173	0.00485055
	1.174	0.00506758
	1.175	0.00558364
	1.176	0.00563567
	1.177	0.00473491
	1.178	0.00460152
	1.179	0.00475641
	1.18	0.00432636
	1.181	0.00377651
	1.181	0.00420315
	1.182	0.00473417
	1.183	0.00620033
	1.184	0.00544954
	1.185	0.00536109
	1.186	0.00478214
	1.187	0.00483964
	1.188	0.00528854
	1.189	0.00493285
	1.19	0.00530991
	1.191	0.00533089
	1.192	0.00508462
	1.192	0.00586014
	1.193	0.00612267
	1.194	0.005607
	1.195	0.00562567
	1.196	0.00452098
	1.197	0.00438885
	1.198	0.00462242
	1.199	0.00470564
	1.2	0.00435174
	1.201	0.00297619
	1.202	0.00193205
	1.202	0.00083866
	1.203	0.00057016
	1.204	0.0005562
	1.205	0.00038871
	1.206	-0.0003641
	1.207	-0.0012526
	1.208	-0.0017822
	1.209	-0.0020297
	1.21	-0.0025472
	1.211	-0.0030005
	1.212	-0.0036476
	1.213	-0.004714
	1.213	-0.0053209
	1.214	-0.0057707
	1.215	-0.0052208
	1.216	-0.0052079
	1.217	-0.0058358
	1.218	-0.005684
	1.219	-0.0060074
	1.22	-0.0070682
	1.221	-0.0084484
	1.222	-0.0092282
	1.223	-0.0090649
	1.224	-0.0088567
	1.224	-0.0077326
	1.225	-0.0070202
	1.226	-0.007378
	1.227	-0.0071084
	1.228	-0.0078513
	1.229	-0.0093657
	1.23	-0.0095313
	1.231	-0.0097936
	1.232	-0.0098164
	1.233	-0.0095201
	1.234	-0.0098039
	1.234	-0.0101527
	1.235	-0.0104157
	1.236	-0.0107946
	1.237	-0.0117759
	1.238	-0.0126722
	1.239	-0.013505
	1.24	-0.0140487
	1.241	-0.0151656
	1.242	-0.0150321
	1.243	-0.0146304
	1.244	-0.0154396
	1.245	-0.0164291
	1.245	-0.0174689
	1.246	-0.0179842
	1.247	-0.0184845
	1.248	-0.0188156
	1.249	-0.0193049
	1.25	-0.0195182
	1.251	-0.0200799
	1.252	-0.0207365
	1.253	-0.0205129
	1.254	-0.0202988
	1.255	-0.0204371
	1.256	-0.0206298
	1.256	-0.0207219
	1.257	-0.020542
	1.258	-0.0206062
	1.259	-0.0207984
	1.26	-0.0211729
	1.261	-0.0219237
	1.262	-0.0220636
	1.263	-0.0220582
	1.264	-0.0224726
	1.265	-0.023237
	1.266	-0.0232324
	1.266	-0.0228583
	1.267	-0.0232647
	1.268	-0.0237441
	1.269	-0.0238093
	1.27	-0.0247028
	1.271	-0.0255141
	1.272	-0.0252784
	1.273	-0.0255873
	1.274	-0.0255871
	1.275	-0.0254005
	1.276	-0.02575
	1.277	-0.0256626
	1.277	-0.0254088
	1.278	-0.0261679
	1.279	-0.0276182
	1.28	-0.0283384
	1.281	-0.0289972
	1.282	-0.0294301
	1.283	-0.0285291
	1.284	-0.0281346
	1.285	-0.0281118
	1.286	-0.0277729
	1.287	-0.0273482
	1.288	-0.0276148
	1.288	-0.0282238
	1.289	-0.0280411
	1.29	-0.0279178
	1.291	-0.0276503
	1.292	-0.0270814
	1.293	-0.0269583
	1.294	-0.0266435
	1.295	-0.0267784
	1.296	-0.0278452
	1.297	-0.0282181
	1.298	-0.028223
	1.298	-0.0281411
	1.299	-0.0279768
	1.3	-0.0287179
	1.301	-0.0285769
	1.302	-0.0291687
	1.303	-0.029753
	1.304	-0.0300805
	1.305	-0.0305267
	1.306	-0.0309136
	1.307	-0.0310266
	1.308	-0.0312787
	1.309	-0.0315152
	1.309	-0.031439
	1.31	-0.0310113
	1.311	-0.0308618
	1.312	-0.0307697
	1.313	-0.0294079
	1.314	-0.0289024
	1.315	-0.0296323
	1.316	-0.0302781
	1.317	-0.0308237
	1.318	-0.0312946
	1.319	-0.0317144
	1.32	-0.0320152
	1.32	-0.0327767
	1.321	-0.0332688
	1.322	-0.0338933
	1.323	-0.0347784
	1.324	-0.0344866
	1.325	-0.0339775
	1.326	-0.0343025
	1.327	-0.0347047
	1.328	-0.034783
	1.329	-0.0353695
	1.33	-0.0361555
	1.331	-0.0374492
	1.331	-0.0389411
	1.332	-0.0396743
	1.333	-0.0399786
	1.334	-0.0402638
	1.335	-0.0405723
	1.336	-0.040684
	1.337	-0.040513
	1.338	-0.0405979
	1.339	-0.0404198
	1.34	-0.0403377
	1.341	-0.0409154
	1.341	-0.0407827
	1.342	-0.0406109
	1.343	-0.0404423
	1.344	-0.0404201
	1.345	-0.0409966
	1.346	-0.040556
	1.347	-0.0404757
	1.348	-0.0405262
	1.349	-0.0406452
	1.35	-0.040901
	1.351	-0.0407561
	1.352	-0.0405792
	1.352	-0.040553
	1.353	-0.0408578
	1.354	-0.0412218
	1.355	-0.0416326
	1.356	-0.0420144
	1.357	-0.0420445
	1.358	-0.0423013
	1.359	-0.0434156
	1.36	-0.0441939
	1.361	-0.0440517
	1.362	-0.044817
	1.363	-0.0451701
	1.363	-0.0454256
	1.364	-0.0459438
	1.365	-0.0465951
	1.366	-0.0464922
	1.367	-0.0454067
	1.368	-0.0456565
	1.369	-0.0460847
	1.37	-0.0470292
	1.371	-0.0476916
	1.372	-0.0473699
	1.373	-0.0469774
	1.373	-0.0468102
	1.374	-0.0465972
	1.375	-0.0464527
	1.376	-0.0466566
	1.377	-0.0460895
	1.378	-0.0458493
	1.379	-0.045679
	1.38	-0.0452786
	1.381	-0.0451074
	1.382	-0.0457398
	1.383	-0.0468765
	1.384	-0.0476487
	1.384	-0.0479614
	1.385	-0.0485116
	1.386	-0.0486016
	1.387	-0.0487848
	1.388	-0.0493077
	1.389	-0.0495373
	1.39	-0.0497483
	1.391	-0.0493931
	1.392	-0.049177
	1.393	-0.0496728
	1.394	-0.0499701
	1.395	-0.0505273
	1.395	-0.0506099
	1.396	-0.0509877
	1.397	-0.051627
	1.398	-0.0521383
	1.399	-0.0521412
	1.4	-0.052191
	1.401	-0.0521765
	1.402	-0.0528316
	1.403	-0.053584
	1.404	-0.0538386
	1.405	-0.0537783
	1.405	-0.0537893
	1.406	-0.0536714
	1.407	-0.0534076
	1.408	-0.0534278
	1.409	-0.0537695
	1.41	-0.0544855
	1.411	-0.0546777
	1.412	-0.0547672
	1.413	-0.0554393
	1.414	-0.0552613
	1.415	-0.0548614
	1.416	-0.0551209
	1.416	-0.0553025
	1.417	-0.0557665
	1.418	-0.055966
	1.419	-0.0568488
	1.42	-0.0581229
	1.421	-0.0586196
	1.422	-0.0586872
	1.423	-0.0593006
	1.424	-0.0603923
	1.425	-0.0608988
	1.426	-0.0610793
	1.427	-0.0616495
	1.427	-0.0619894
	1.428	-0.0615309
	1.429	-0.0611426
	1.43	-0.061565
	1.431	-0.0617249
	1.432	-0.0627862
	1.433	-0.0630584
	1.434	-0.0624822
	1.435	-0.0621865
	1.436	-0.0621293
	1.437	-0.0635399
	1.437	-0.0650357
	1.438	-0.0658855
	1.439	-0.0659606
	1.44	-0.0661762
	1.441	-0.0662743
	1.442	-0.0665172
	1.443	-0.0667184
	1.444	-0.0674092
	1.445	-0.0676128
	1.446	-0.068118
	1.447	-0.0690327
	1.448	-0.0697967
	1.448	-0.0702174
	1.449	-0.070883
	1.45	-0.0714972
	1.451	-0.072142
	1.452	-0.072463
	1.453	-0.0724872
	1.454	-0.0721552
	1.455	-0.0721618
	1.456	-0.071472
	1.457	-0.0711139
	1.458	-0.0709692
	1.459	-0.0711852
	1.459	-0.0712087
	1.46	-0.0713528
	1.461	-0.0711838
	1.462	-0.0715304
	1.463	-0.0717182
	1.464	-0.0719839
	1.465	-0.0726932
	1.466	-0.0722678
	1.467	-0.0733021
	1.468	-0.0725852
	1.469	-0.0717229
	1.469	-0.0713871
	1.47	-0.0710023
	1.471	-0.0716812
	1.472	-0.0718933
	1.473	-0.0721995
	1.474	-0.071985
	1.475	-0.0720355
	1.476	-0.0718843
	1.477	-0.0721267
	1.478	-0.0717337
	1.479	-0.0723598
	1.48	-0.0734589
	1.48	-0.0739677
	1.481	-0.0750596
	1.482	-0.075429
	1.483	-0.0744015
	1.484	-0.0733845
	1.485	-0.073596
	1.486	-0.0734059
	1.487	-0.073645
	1.488	-0.0740834
	1.489	-0.0735046
	1.49	-0.0727266
	1.491	-0.0729238
	1.491	-0.0735192
	1.492	-0.0731882
	1.493	-0.0732202
	1.494	-0.0728407
	1.495	-0.0727835
	1.496	-0.0723627
	1.497	-0.0725398
	1.498	-0.0733337
	1.499	-0.0745777
	1.5	-0.0752235
	1.501	-0.0754481
	1.501	-0.0754344
	1.502	-0.0761582
	1.503	-0.0766512
	1.504	-0.0776439
	1.505	-0.0784129
	1.506	-0.0791153
	1.507	-0.0796452
	1.508	-0.0792585
	1.509	-0.0801621
	1.51	-0.0801931
	1.511	-0.0800001
	1.512	-0.0800176
	1.512	-0.0797424
	1.513	-0.0803758
	1.514	-0.0818772
	1.515	-0.0823307
	1.516	-0.0830126
	1.517	-0.0832461
	1.518	-0.0835715
	1.519	-0.0833947
	1.52	-0.0838811
	1.521	-0.0851079
	1.522	-0.0856682
	1.523	-0.0869951
	1.523	-0.0877662
	1.524	-0.0880358
	1.525	-0.0881046
	1.526	-0.0882941
	1.527	-0.0890752
	1.528	-0.0886151
	1.529	-0.0897883
	1.53	-0.0906426
	1.531	-0.0916527
	1.532	-0.0923564
	1.533	-0.0927348
	1.533	-0.0931813
	1.534	-0.0939298
	1.535	-0.094422
	1.536	-0.0954865
	1.537	-0.0956059
	1.538	-0.0962559
	1.539	-0.095773
	1.54	-0.0961756
	1.541	-0.0955894
	1.542	-0.0962625
	1.543	-0.0969035
	1.544	-0.0971436
	1.544	-0.0963953
	1.545	-0.0968788
	1.546	-0.0967303
	1.547	-0.0975941
	1.548	-0.0977112
	1.549	-0.0986285
	1.55	-0.097967
	1.551	-0.0987847
	1.552	-0.0983079
	1.553	-0.0987265
	1.554	-0.100074
	1.555	-0.0996663
	1.555	-0.100827
	1.556	-0.100632
	1.557	-0.101426
	1.558	-0.102504
	1.559	-0.103098
	1.56	-0.103212
	1.561	-0.102901
	1.562	-0.103027
	1.563	-0.103478
	1.564	-0.104028
	1.565	-0.104684
	1.566	-0.105317
	1.566	-0.105051
	1.567	-0.105386
	1.568	-0.104739
	1.569	-0.104484
	1.57	-0.1052
	1.571	-0.105499
	1.572	-0.106547
	1.573	-0.106757
	1.574	-0.106746
	1.575	-0.106857
	1.576	-0.107458
	1.576	-0.107809
	1.577	-0.108063
	1.578	-0.108536
	1.579	-0.10859
	1.58	-0.109368
	1.581	-0.109958
	1.582	-0.109755
	1.583	-0.110238
	1.584	-0.110958
	1.585	-0.111289
	1.586	-0.111094
	1.587	-0.112245
	1.587	-0.113173
	1.588	-0.113522
	1.589	-0.113676
	1.59	-0.114173
	1.591	-0.11462
	1.592	-0.115418
	1.593	-0.11534
	1.594	-0.115734
	1.595	-0.116057
	1.596	-0.116465
	1.597	-0.116454
	1.598	-0.117537
	1.598	-0.118066
	1.599	-0.11885
	1.6	-0.119933
	1.601	-0.12011
	1.602	-0.119782
	1.603	-0.120448
	1.604	-0.120689
	1.605	-0.120667
	1.606	-0.120442
	1.607	-0.121093
	1.608	-0.121489
	1.608	-0.122496
	1.609	-0.123732
	1.61	-0.123928
	1.611	-0.123911
	1.612	-0.123673
	1.613	-0.123995
	1.614	-0.125154
	1.615	-0.125494
	1.616	-0.125468
	1.617	-0.125649
	1.618	-0.126051
	1.619	-0.126737
	1.619	-0.127335
	1.62	-0.127386
	1.621	-0.127506
	1.622	-0.128137
	1.623	-0.128505
	1.624	-0.128556
	1.625	-0.129107
	1.626	-0.129364
	1.627	-0.12961
	1.628	-0.130391
	1.629	-0.130276
	1.63	-0.130014
	1.63	-0.130523
	1.631	-0.131652
	1.632	-0.131949
	1.633	-0.13205
	1.634	-0.13268
	1.635	-0.132615
	1.636	-0.132711
	1.637	-0.132737
	1.638	-0.133097
	1.639	-0.13364
	1.64	-0.133832
	1.64	-0.133746
	1.641	-0.134164
	1.642	-0.134383
	1.643	-0.134153
	1.644	-0.134382
	1.645	-0.133997
	1.646	-0.133491
	1.647	-0.13351
	1.648	-0.134583
	1.649	-0.134544
	1.65	-0.133826
	1.651	-0.13387
	1.651	-0.134589
	1.652	-0.135246
	1.653	-0.13578
	1.654	-0.135378
	1.655	-0.134973
	1.656	-0.134988
	1.657	-0.135425
	1.658	-0.135892
	1.659	-0.136225
	1.66	-0.13616
	1.661	-0.137145
	1.662	-0.137806
	1.662	-0.137764
	1.663	-0.137062
	1.664	-0.136734
	1.665	-0.137438
	1.666	-0.138267
	1.667	-0.138436
	1.668	-0.138309
	1.669	-0.13817
	1.67	-0.138696
	1.671	-0.139229
	1.672	-0.138931
	1.672	-0.138486
	1.673	-0.138126
	1.674	-0.138722
	1.675	-0.139272
	1.676	-0.14013
	1.677	-0.140537
	1.678	-0.14109
	1.679	-0.141628
	1.68	-0.141863
	1.681	-0.14263
	1.682	-0.14348
	1.683	-0.143738
	1.683	-0.144358
	1.684	-0.144827
	1.685	-0.145445
	1.686	-0.146105
	1.687	-0.146229
	1.688	-0.146616
	1.689	-0.147237
	1.69	-0.147373
	1.691	-0.148111
	1.692	-0.149012
	1.693	-0.149368
	1.694	-0.149952
	1.694	-0.150532
	1.695	-0.150913
	1.696	-0.151803
	1.697	-0.152579
	1.698	-0.152649
	1.699	-0.152683
	1.7	-0.152919
	1.701	-0.153434
	1.702	-0.15419
	1.703	-0.155266
	1.704	-0.156035
	1.704	-0.156425
	1.705	-0.1564
	1.706	-0.156049
	1.707	-0.156086
	1.708	-0.156728
	1.709	-0.157471
	1.71	-0.157925
	1.711	-0.157521
	1.712	-0.157218
	1.713	-0.157056
	1.714	-0.157164
	1.715	-0.157641
	1.715	-0.158111
	1.716	-0.158473
	1.717	-0.159151
	1.718	-0.159897
	1.719	-0.160327
	1.72	-0.160474
	1.721	-0.160422
	1.722	-0.159825
	1.723	-0.159163
	1.724	-0.159447
	1.725	-0.159562
	1.726	-0.15964
	1.726	-0.159812
	1.727	-0.15947
	1.728	-0.159295
	1.729	-0.159416
	1.73	-0.160241
	1.731	-0.160606
	1.732	-0.16011
	1.733	-0.160252
	1.734	-0.161243
	1.735	-0.161699
	1.736	-0.162457
	1.736	-0.162381
	1.737	-0.161721
	1.738	-0.161841
	1.739	-0.161857
	1.74	-0.16145
	1.741	-0.162408
	1.742	-0.163192
	1.743	-0.162855
	1.744	-0.163071
	1.745	-0.163324
	1.746	-0.164014
	1.747	-0.164523
	1.747	-0.16464
	1.748	-0.164197
	1.749	-0.163548
	1.75	-0.163393
	1.751	-0.163336
	1.752	-0.16337
	1.753	-0.163702
	1.754	-0.164585
	1.755	-0.16553
	1.756	-0.16572
	1.757	-0.166993
	1.758	-0.16824
	1.758	-0.169183
	1.759	-0.169973
	1.76	-0.169774
	1.761	-0.169742
	1.762	-0.169442
	1.763	-0.16926
	1.764	-0.169803
	1.765	-0.170547
	1.766	-0.170883
	1.767	-0.170815
	1.768	-0.171177
	1.768	-0.172261
	1.769	-0.173533
	1.77	-0.174335
	1.771	-0.174521
	1.772	-0.174356
	1.773	-0.175102
	1.774	-0.176205
	1.775	-0.176899
	1.776	-0.176854
	1.777	-0.176984
	1.778	-0.178006
	1.779	-0.178589
	1.779	-0.178723
	1.78	-0.179311
	1.781	-0.179526
	1.782	-0.180283
	1.783	-0.181088
	1.784	-0.181768
	1.785	-0.182016
	1.786	-0.182529
	1.787	-0.182757
	1.788	-0.18328
	1.789	-0.184035
	1.79	-0.18463
	1.79	-0.185137
	1.791	-0.185369
	1.792	-0.185603
	1.793	-0.184806
	1.794	-0.18485
	1.795	-0.185747
	1.796	-0.187101
	1.797	-0.188806
	1.798	-0.189228
	1.799	-0.189144
	1.8	-0.188621
	1.8	-0.188299
	1.801	-0.189424
	1.802	-0.189916
	1.803	-0.190076
	1.804	-0.190596
	1.805	-0.190633
	1.806	-0.191087
	1.807	-0.192021
	1.808	-0.192813
	1.809	-0.194049
	1.81	-0.194245
	1.811	-0.193797
	1.811	-0.194154
	1.812	-0.19542
	1.813	-0.196654
	1.814	-0.196817
	1.815	-0.196447
	1.816	-0.195961
	1.817	-0.196757
	1.818	-0.197562
	1.819	-0.198215
	1.82	-0.198812
	1.821	-0.198753
	1.822	-0.199554
	1.822	-0.199852
	1.823	-0.199378
	1.824	-0.200016
	1.825	-0.200438
	1.826	-0.200631
	1.827	-0.200828
[truncated: 24,249 more rows]

[truncated: 3 more sheets: Supplementary Fig 9a, Supplementary Fig 10b-c, Supplementary Fig 12c-f]
